# Supplementary material for: Uncrewed Surface Vessel Technological Diffusion Depends on Cross-Sectoral Investment in Open-Ocean Archetypes: A Systematic Review of USV Applications and Drivers
Source: Frontiers journal article supplement (doi:10.3389/fmars.2021.736984), 2022-01-06
Supplement: Data_Sheet_1.PDF [file Data_Sheet_1.PDF]

## *Supplementary Material*

### **Supplementary 1: Description of application types**

Hydrographic surveys: bathymetric, archaeological, benthic habitat

Ecological survey: acoustic-tag tracking, fish biomass, passive acoustic monitoring, acoustic monitoring

Inshore surveillance: port/harbor surface target tracking, port/harbor subsurface target tracking

Offshore surveillance: offshore asset protection (communications and offshore nuclear reactor), sovereign maritime security, persistent ocean surveillance

Infrastructure protection/inspection: Infrastructure quality surveys and inspections (bridges, dams, subsea cables/pipelines, offshore platforms), automated boom deployment, hull-cleaning vessels, monitoring underwater dredging, submerged infrastructure during floods.

Pollution control: onboard water sampling, pollution detection, radiation detection, spill boom deployments, plume tracking, marine debris

Environmental monitoring: water quality monitoring, water quality sampling, on-board sample processing, meteorological monitoring, sea surface height, wave height, velocity profiling (ADCP), microorganism collection, air-sea/air-sea-ice flux measurements, tracer dispersion tracking

SAR or search: flood disaster relief, sub-sea wreckages, detection and tracking contacts, transport and release of rescue/survival equipment, search and rescue

Collaborative with multiple unmanned vehicles or multi-USV: tracking, docking, launching and recovering other remotely operated or autonomous platforms, data transfer between remotely operated or autonomous platforms, power supply, rendezvous planning, umbilical linking, collaborative surveillance, navigation aid for subsea vehicles.

Military: guarding civilian boats, antisubmarine warfare, surface warfare, mine warfare, intelligence, surveillance and reconnaissance, electronic warfare

Mine counter measures: target detection and reporting

**Supplementary 2: Commercial USV makes, hull type and design assessment**

| <b>Commercial USV</b>                   | <b>Published paper counts</b> | <b>Hull type</b>    | <b>Designed for Unsheltered and Unescorted (UU) or Escorted or Sheltered (ES)</b> |
|-----------------------------------------|-------------------------------|---------------------|-----------------------------------------------------------------------------------|
| Autonaut                                | 1                             | single              | UU                                                                                |
| CatOne                                  | 1                             | multi               | ES                                                                                |
| C-enduro                                | 1                             | multi               | ES                                                                                |
| C-worker                                | 1                             | not self-correcting | ES                                                                                |
| Charlie                                 | 3                             | Multi               | ES                                                                                |
| Edredon                                 | 1                             | not self-correcting | ES                                                                                |
| EMILY                                   | 1                             | Single              | UU                                                                                |
| Kth ANKA                                | 1                             | Multi               | ES                                                                                |
| L3                                      | 1                             | Multi               | ES                                                                                |
| M40                                     | 1                             | Multi               | ES                                                                                |
| MANTA                                   | 2                             | Multi               | ES                                                                                |
| ROAZ                                    | 3                             | Multi               | ES                                                                                |
| Saildrone                               | 10                            | Single              | UU                                                                                |
| Seafox USV                              | 1                             | not self-correcting | ES                                                                                |
| Seagull                                 | 1                             | Multi               | ES                                                                                |
| SEA-KIT                                 | 1                             | Single              | UU                                                                                |
| SEA-RAI                                 | 1                             | Multi               | ES                                                                                |
| SMARTboat                               | 1                             | Multi               | ES                                                                                |
| Smart-sonar-boat                        | 1                             | Multi               | ES                                                                                |
| SWATH                                   | 1                             | Multi               | ES                                                                                |
| SWORDFISH                               | 1                             | Multi               | ES                                                                                |
| Teledyne<br>Oceanscience z-boat<br>1800 | 1                             | Multi               | ES                                                                                |
| Telemetron                              | 1                             | not self-correcting | ES                                                                                |
| WAM-V                                   | 5                             | Multi               | ES                                                                                |
| WASP                                    | 1                             | Single              | UU                                                                                |
| Waveglider                              | 13                            | Single              | UU                                                                                |
| WeMo                                    | 2                             | Multi               | ES                                                                                |
