# Supplementary material for: Uncrewed Surface Vessel Technological Diffusion Depends on Cross-Sectoral Investment in Open-Ocean Archetypes: A Systematic Review of USV Applications and Drivers
Source: Frontiers journal article supplement (doi:10.3389/fmars.2021.736984), 2022-01-06
Supplement: Table_1.XLSX [file Table_1.XLSX]

## Sheet: Sheet1
	Web of Science literature search
	TOPIC: (unmanned surface vessel) OR TOPIC: (unmanned surface vehicle) NOT TOPIC: (aerial) NOT TOPIC: (airborne)
	Timespan=2000-2020. Indexes=SCI-EXPANDED, SSCI, A&HCI, CPCI-S, CPCI-SSH, ESCI, CCR-EXPANDED, IC.
total count	literature category
848	1 engineering
196	2 application
49	1 and 2
13	3 other
584	4 not relevant
1106	total papers used in this study
245	Total applications papers
584	Total papers excluded from this study
1690	Total papers as a result of the search
category	Title	Authors	Source Title	Publication Year
4	The control of flow separation by periodic excitation	Greenblatt, D; Wygnanski, IJ	PROGRESS IN AEROSPACE SCIENCES	2000
4	Natural terrain classification using three-dimensional ladar data for ground robot mobility	Lalonde, Jean-Francois; Vandapel, Nicolas; Huber, Daniel F.; Hebert, Martial	JOURNAL OF FIELD ROBOTICS	2006
4	Backstepping-based flight control with adaptive function approximation	Farrell, J; Sharma, M; Polycarpou, M	JOURNAL OF GUIDANCE CONTROL AND DYNAMICS	2005
1 and 2	Unmanned surface vehicles.: An overview of developments and challenges	Liu, Zhixiang; Zhang, Youmin; Yu, Xiang; Yuan, Chi	ANNUAL REVIEWS IN CONTROL	2016
1	A review on improving the autonomy of unmanned surface vehicles through intelligent collision avoidance manoeuvres	Campbell, S.; Naeem, W.; Irwin, G. W.	ANNUAL REVIEWS IN CONTROL	2012
1	Basic navigation, guidance and control of an Unmanned Surface Vehicle	Caccia, Massimo; Bibuli, Marco; Bono, Riccardo; Bruzzone, Gabriele	AUTONOMOUS ROBOTS	2008
4	Aerothermodynamic study of UHTC-based thermal protection systems	Savino, R; Fumo, MD; Paterna, D; Serpico, M	AEROSPACE SCIENCE AND TECHNOLOGY	2005
1	Safe Maritime Autonomous Navigation With COLREGS, Using Velocity Obstacles	Kuwata, Yoshiaki; Wolf, Michael T.; Zarzhitsky, Dimitri; Huntsberger, Terrance L.	IEEE JOURNAL OF OCEANIC ENGINEERING	2014
4	Design and Fabrication of a Passive 1D Morphing Aircraft Skin	Bubert, Edward A.; Woods, Benjamin K. S.; Lee, Keejoo; Kothera, Curt S.; Wereley, N. M.	JOURNAL OF INTELLIGENT MATERIAL SYSTEMS AND STRUCTURES	2010
4	Piezoaeroelastic Modeling and Analysis of a Generator Wing with Continuous and Segmented Electrodes	De Marqui, Carlos, Jr.; Erturk, Alper; Inman, Daniel J.	JOURNAL OF INTELLIGENT MATERIAL SYSTEMS AND STRUCTURES	2010
1	Sliding-mode formation control for underactuated surface vessels	Fahimi, Farbod	IEEE TRANSACTIONS ON ROBOTICS	2007
2	Autonomous Bathymetry for Risk Assessment with ROAZ Robotic Surface Vehicle	Ferreira, Hugo; Almeida, C.; Martins, A.; Almeida, J.; Dias, N.; Dias, A.; Silva, E.	OCEANS 2009 - EUROPE, VOLS 1 AND 2	2009
1	Integral Line-of-Sight Guidance and Control of Underactuated Marine Vehicles: Theory, Simulations, and Experiments	Caharija, Walter; Pettersen, Kristin Y.; Bibuli, Marco; Calado, Pedro; Zereik, Enrica; Braga, Jose; Gravdahl, Jan Tommy; Sorensen, Asgeir J.; Milovanovic, Milan; Bruzzone, Gabriele	IEEE TRANSACTIONS ON CONTROL SYSTEMS TECHNOLOGY	2016
1	Path following control for marine surface vessel with uncertainties and input saturation	Zheng, Zewei; Sun, Liang	NEUROCOMPUTING	2016
1	COLREGs-based collision avoidance strategies for unmanned surface vehicles	Naeem, Wasif; Irwin, George W.; Yang, Aolei	MECHATRONICS	2012
4	Collaborative optimization using response surface estimation	Sobieski, IP; Kroo, IM	AIAA JOURNAL	2000
4	Generalized vector explicit guidance	Ohlmeyer, EJ; Phillips, CA	JOURNAL OF GUIDANCE CONTROL AND DYNAMICS	2006
1	Path planning algorithm for unmanned surface vehicle formations in a practical maritime environment	Liu, Yuanchang; Bucknall, Richard	OCEAN ENGINEERING	2015
1	Platoon Formation Control With Prescribed Performance Guarantees for USVs	Dai, Shi-Lu; He, Shude; Lin, Hai; Wang, Cong	IEEE TRANSACTIONS ON INDUSTRIAL ELECTRONICS	2018
1	Straight-Line Target Tracking for Unmanned Surface Vehicles	Breivik, Morten; Hovstein, Vegard E.; Fossen, Thor I.	MODELING IDENTIFICATION AND CONTROL	2008
1	The development of a biologically inspired propulsor for unmanned underwater vehicles	Tangorra, James Louis; Davidson, S. Naomi; Hunter, Ian W.; Madden, Peter G. A.; Lauder, George V.; Dong, Haibo; Bozkurttas, Meliha; Mittal, Rajat	IEEE JOURNAL OF OCEANIC ENGINEERING	2007
1	Swarm Formation Control Utilizing Elliptical Surfaces and Limiting Functions	Barnes, Laura E.; Fields, Mary Anne; Valavanis, Kimon P.	IEEE TRANSACTIONS ON SYSTEMS MAN AND CYBERNETICS PART B-CYBERNETICS	2009
1	Stereo Vision-Based Navigation for Autonomous Surface Vessels	Huntsberger, Terry; Aghazarian, Hrand; Howard, Andrew; Trotz, David C.	JOURNAL OF FIELD ROBOTICS	2011
4	Globally finite-time stable tracking control of underactuated UUVs	Yan, Zheping; Yu, Haomiao; Zhang, Wei; Li, Benyin; Zhou, Jiajia	OCEAN ENGINEERING	2015
1 and 2	The design of a navigation, guidance, and control system for an unmanned surface vehicle for environmental monitoring	Naeem, W.; Xu, T.; Sutton, R.; Tiano, A.	PROCEEDINGS OF THE INSTITUTION OF MECHANICAL ENGINEERS PART M-JOURNAL OF ENGINEERING FOR THE MARITIME ENVIRONMENT	2008
1	Modeling, Identification, and Control of an Unmanned Surface Vehicle	Sonnenburg, Christian R.; Woolsey, Craig A.	JOURNAL OF FIELD ROBOTICS	2013
1	Landing, perching and taking off from vertical surfaces	Lussier Desbiens, Alexis; Asbeck, Alan T.; Cutkosky, Mark R.	INTERNATIONAL JOURNAL OF ROBOTICS RESEARCH	2011
4	Modeling and Analysis of Piezoelectric Energy Harvesting From Aeroelastic Vibrations Using the Doublet-Lattice Method	De Marqui, Carlos, Jr.; Vieira, Wander G. R.; Erturk, Alper; Inman, Daniel J.	JOURNAL OF VIBRATION AND ACOUSTICS-TRANSACTIONS OF THE ASME	2011
4	Plasma actuators for hingeless aerodynamic control of an unmanned air vehicle	Patel, Mehul P.; Ng, T. Terry; Vasudevan, Srikanth; Corke, Thomas C.; He, Chuan	JOURNAL OF AIRCRAFT	2007
1	Network-Based Fault Detection Filter and Controller Coordinated Design for Unmanned Surface Vehicles in Network Environments	Wang, Yu-Long; Han, Qing-Long	IEEE TRANSACTIONS ON INDUSTRIAL INFORMATICS	2016
4	Design of solar high altitude long endurance aircraft for multi payload & operations	Cestino, Enrico	AEROSPACE SCIENCE AND TECHNOLOGY	2006
3	Applications of marine robotic vehicles	Yuh, J.; Marani, Giacomo; Blidberg, D. Richard	INTELLIGENT SERVICE ROBOTICS	2011
1	Path-Following Algorithms and Experiments for an Unmanned Surface Vehicle	Bibuli, Marco; Bruzzone, Gabriele; Caccia, Massimo; Lapierre, Lionel	JOURNAL OF FIELD ROBOTICS	2009
1	Ship's Trajectory Planning for Collision Avoidance at Sea Based on Ant Colony Optimisation	Lazarowska, Agnieszka	JOURNAL OF NAVIGATION	2015
4	Prototype microrobots for micro-positioning and micro-unmanned vehicles	Kladitis, PE; Bright, VM	SENSORS AND ACTUATORS A-PHYSICAL	2000
1	A Novel Extreme Learning Control Framework of Unmanned Surface Vehicles	Wang, Ning; Sun, Jing-Chao; Er, Meng Joo; Liu, Yan-Cheng	IEEE TRANSACTIONS ON CYBERNETICS	2016
1	Angular rate-constrained path planning algorithm for unmanned surface vehicles	Kim, Hanguen; Kim, Donghoon; Shin, Jae-Uk; Kim, Hyongjin; Myung, Hyun	OCEAN ENGINEERING	2014
1	Review of Nonlinear Tracking and Setpoint Control Approaches for Autonomous Underactuated Marine Vehicles	Ashrafiuon, Hashem; Muske, Kenneth R.; McNinch, Lucas C.	2010 AMERICAN CONTROL CONFERENCE	2010
1	A method for protocol-based collision avoidance between autonomous marine surface craft	Benjamin, Michael R.; Leonard, John J.; Curcio, Joseph A.; Newman, Paul M.	JOURNAL OF FIELD ROBOTICS	2006
2	Unmanned surface vehicle for coastal and protected waters applications: the Charlie Project	Caccia, M.; Bibidi, M.; Bono, R.; Bruzzone, Ga.; Bruzzone, Gi.; Spirandelli, E.	MARINE TECHNOLOGY SOCIETY JOURNAL	2007
4	Macro-fiber composite actuators for a swept wing unmanned aircraft	Bilgen, O.; Kochersberger, K. B.; Inman, D. J.	AERONAUTICAL JOURNAL	2009
4	Flight testing of the T-wing tail-sitter unmanned air vehicle	Stone, R. Hugh; Anderson, Peter; Hutchison, Colin; Tsai, Allen; Gibbens, Peter; Wong, K. C.	JOURNAL OF AIRCRAFT	2008
1	Navigation of unmanned marine vehicles in accordance with the rules of the road	Benjamin, Michael R.; Curcio, Joseph A.; Leonard, John J.; Newman, Paul M.	2006 IEEE INTERNATIONAL CONFERENCE ON ROBOTICS AND AUTOMATION (ICRA), VOLS 1-10	2006
4	Unmanned ground vehicle swarm formation control using potential fields	Barnes, Laura; Fields, MaryAnne; Valavanis, Kimon	2007 MEDITERRANEAN CONFERENCE ON CONTROL & AUTOMATION, VOLS 1-4	2007
4	A High-Performance Ultrasonic System for the Simultaneous Transmission of Data and Power Through Solid Metal Barriers	Lawry, Tristan J.; Wilt, Kyle R.; Ashdown, Jon D.; Scarton, Henry A.; Saulnier, Gary J.	IEEE TRANSACTIONS ON ULTRASONICS FERROELECTRICS AND FREQUENCY CONTROL	2013
4	Autonomous underwater vehicles: future platforms for fisheries acoustics	Fernandes, PG; Stevenson, P; Brierley, AS; Armstrong, F; Simmonds, EJ	ICES JOURNAL OF MARINE SCIENCE	2003
1	Single Input Fuzzy Logic Controller for Unmanned Underwater Vehicle	Ishaque, Kashif; Abdullah, S. S.; Ayob, S. M.; Salam, Z.	JOURNAL OF INTELLIGENT & ROBOTIC SYSTEMS	2010
1	Trajectory tracking control of underactuated USV based on modified backstepping approach	Dong, Zaopeng; Wan, Lei; Li, Yueming; Liul, Tao; Zhane, Guocheng	INTERNATIONAL JOURNAL OF NAVAL ARCHITECTURE AND OCEAN ENGINEERING	2015
1	A multi-layered fast marching method for unmanned surface vehicle path planning in a time-variant maritime environment	Song, Rui; Liu, Yuanchang; Bucknall, Richard	OCEAN ENGINEERING	2017
2	The Wave Glider: enabling a new approach to persistent ocean observation and research	Daniel, Tom; Manley, Justin; Trenaman, Neil	OCEAN DYNAMICS	2011
1	Target following with motion prediction for unmanned surface vehicle operating in cluttered environments	Svec, Petr; Thakur, Atul; Raboin, Eric; Shah, Brual C.; Gupta, Satyandra K.	AUTONOMOUS ROBOTS	2014
4	Military applications of agent-based simulations	Cioppa, TM; Lucas, TW; Sanchez, SM	PROCEEDINGS OF THE 2004 WINTER SIMULATION CONFERENCE, VOLS 1 AND 2	2004
1	A real-time collision avoidance learning system for Unmanned Surface Vessels	Zhao, Yuxin; Li, Wang; Shi, Peng	NEUROCOMPUTING	2016
4	Underwater optical communications systems - Part 1: Variability of water optical parameters	Smart, Jeffrey H.	MILCOM 2005 - 2005 IEEE MILITARY COMMUNICATIONS CONFERENCE, VOLS 1-5	2005
4	Landing and Perching on Vertical Surfaces with Microspines for Small Unmanned Air Vehicles	Desbiens, Alexis Lussier; Cutkosky, Mark R.	JOURNAL OF INTELLIGENT & ROBOTIC SYSTEMS	2010
1	Leader-Follower Formation Control of USVs With Prescribed Performance and Collision Avoidance	He, Shude; Wang, Min; Dai, Shi-Lu; Luo, Fei	IEEE TRANSACTIONS ON INDUSTRIAL INFORMATICS	2019
4	Introduction to the Limnology and Oceanography Special Issue on Autonomous and Lagrangian Platforms and Sensors (ALPS)	Dickey, T. D.; Itsweire, E. C.; Moline, M. A.; Perry, M. J.	LIMNOLOGY AND OCEANOGRAPHY	2008
1	Multi-objective path planning for unmanned surface vehicle with currents effects	Ma, Yong; Hu, Mengqi; Yan, Xinping	ISA TRANSACTIONS	2018
1	Fast Image-Based Obstacle Detection From Unmanned Surface Vehicles	Kristan, Matej; Kenk, Vildana Sulic; Kovacic, Stanislav; Pers, Janez	IEEE TRANSACTIONS ON CYBERNETICS	2016
1	Adaptive Path-Following Control for an Unmanned Surface Vessel Using an Identified Dynamic Model	Shin, Jongho; Kwak, Dong Jun; Lee, Young-il	IEEE-ASME TRANSACTIONS ON MECHATRONICS	2017
1	Fast In-Field Identification of Unmanned Marine Vehicles	Miskovic, Nikola; Vukic, Zoran; Bibuli, Marco; Bruzzone, Gabriele; Caccia, Massimo	JOURNAL OF FIELD ROBOTICS	2011
1	A constrained A* approach towards optimal path planning for an unmanned surface vehicle in a maritime environment containing dynamic obstacles and ocean currents	Singh, Yogang; Sharma, Sanjay; Sutton, Robert; Hatton, Daniel; Khan, Asiya	OCEAN ENGINEERING	2018
1	Intelligent rudder control of an unmanned surface vessel	Menoyo Larrazabal, J.; Santos Penas, M.	EXPERT SYSTEMS WITH APPLICATIONS	2016
4	Terrain classification and identification of tree stems using ground-based LiDAR	McDaniel, Matthew W.; Nishihata, Takayuki; Brooks, Christopher A.; Salesses, Phil; Iagnemma, Karl	JOURNAL OF FIELD ROBOTICS	2012
1	Guidance of Unmanned Surface Vehicles Experiments in Vehicle Following	Bibuli, Marco; Caccia, Massimo; Lapierre, Lionel; Bruzzone, Gabriele	IEEE ROBOTICS & AUTOMATION MAGAZINE	2012
1	Obstacle Avoidance System with LiDAR Sensor Based Fuzzy Control for an Autonomous Unmanned Ship	Song, HyunWoo; Lee, Kwangkook; Kim, Dong Hun	2018 JOINT 10TH INTERNATIONAL CONFERENCE ON SOFT COMPUTING AND INTELLIGENT SYSTEMS (SCIS) AND 19TH INTERNATIONAL SYMPOSIUM ON ADVANCED INTELLIGENT SYSTEMS (ISIS)	2018
4	Adaptive Composite Marine Propulsors and Turbines: Progress and Challenges	Young, Yin Lu; Motley, Michael R.; Barber, Ramona; Chae, Eun Jung; Garg, Nitin	APPLIED MECHANICS REVIEWS	2016
4	Fire safety in space - beyond flammability testing of small samples	Jomaas, Grunde; Torero, Jose L.; Eigenbrod, Christian; Niehaus, Justin; Olson, Sandra L.; Ferkul, Paul V.; Legros, Guillaume; Fernandez-Pello, A. Carlos; Cowlard, Adam J.; Rouvreau, Sebastien; Smirnov, Nickolay; Fujita, Osamu; T'ien, James S.; Ruff, Gary A.; Urban, David L.	ACTA ASTRONAUTICA	2015
4	Autonomous Exploration and Motion Planning for an Unmanned Aerial Vehicle Navigating Rivers	Nuske, Stephen; Choudhury, Sanjiban; Jain, Sezal; Chambers, Andrew; Yoder, Luke; Scherer, Sebastian; Chamberlain, Lyle; Cover, Hugh; Singh, Sanjiv	JOURNAL OF FIELD ROBOTICS	2015
1	Experimental evaluation of automatically-generated behaviors for USV operations	Bertaska, Ivan R.; Shah, Brual; von Ellenrieder, Karl; Svec, Petr; Klinger, Wilhelm; Sinisterra, Armando J.; Dhanak, Manhar; Gupta, Satyandra K.	OCEAN ENGINEERING	2015
4	Design and Implementation of an Unmanned Tail-sitter	Bapst, Roman; Ritz, Robin; Meier, Lorenz; Pollefeys, Marc	2015 IEEE/RSJ INTERNATIONAL CONFERENCE ON INTELLIGENT ROBOTS AND SYSTEMS (IROS)	2015
4	A novel unmanned aircraft with solid-state control surfaces: Analysis and flight demonstration	Bilgen, Onur; Butt, Lauren M.; Day, Steven R.; Sossi, Craig A.; Weaver, Joseph P.; Wolek, Artur; Mason, William H.; Inman, Daniel J.	JOURNAL OF INTELLIGENT MATERIAL SYSTEMS AND STRUCTURES	2013
1 and 2	Coordinated Navigation of Surface and Underwater Marine Robotic Vehicles for Ocean Sampling and Environmental Monitoring	Vasilijevic, Antonio; Nad, Dula; Mandic, Filip; Miskovic, Nikola; Vukic, Zoran	IEEE-ASME TRANSACTIONS ON MECHATRONICS	2017
1	GPU based generation of state transition models using simulations for unmanned surface vehicle trajectory planning	Thakur, Atul; Svec, Petr; Gupta, Satyandra K.	ROBOTICS AND AUTONOMOUS SYSTEMS	2012
4	Cooperative Positioning in Underwater Sensor Networks	Tan, Xing; Li, Jian	IEEE TRANSACTIONS ON SIGNAL PROCESSING	2010
4	Trajectory tracking control for a marine surface vessel with asymmetric saturation actuators	Zheng, Zewei; Jin, Cheng; Zhu, Ming; Sun, Kangwen	ROBOTICS AND AUTONOMOUS SYSTEMS	2017
1	Horizontal-plane Trajectory-tracking Control of an Underactuated Unmanned Marine Vehicle in the Presence of Ocean Currents	Dong, Zaopeng; Wan, Lei; Liu, Tao; Zeng, Jiangfeng	INTERNATIONAL JOURNAL OF ADVANCED ROBOTIC SYSTEMS	2016
4	Trends in marine control systems	Roberts, G. N.	ANNUAL REVIEWS IN CONTROL	2008
4	Pseudo long base line navigation algorithm for underwater vehicles with inertial sensors and two acoustic range measurements	Lee, Pan-Mook; Jun, Bong-Huan	OCEAN ENGINEERING	2007
4	Induced drag reduction using aeroelastic tailoring with adaptive control surfaces	Weisshaar, TA; Duke, DK	JOURNAL OF AIRCRAFT	2006
4	Fast and reliable obstacle detection and segmentation for cross-country navigation	Talukder, A; Manduchi, R; Rankin, A; Matthies, L	IV'2002: IEEE INTELLIGENT VEHICLE SYMPOSIUM, PROCEEDINGS	2002
1	Developing a navigation, guidance and obstacle avoidance algorithm for an Unmanned Surface Vehicle (USV) by algorithms fusion	Mousazadeh, Hossein; Jafarbiglu, Hamid; Abdolmaleki, Hamid; Omrani, Elham; Monhaseri, Farshid; Abdollahzadeh, Mohammad-reza; Mohammadi-Aghdam, Aref; Kiapei, Ali; Salmani-Zakaria, Yousef; Makhsoos, Ashkan	OCEAN ENGINEERING	2018
2	Integrating Sensors into a Marine Drone for Bathymetric 3D Surveys in Shallow Waters	Giordano, Francesco; Mattei, Gaia; Parente, Claudio; Peluso, Francesco; Santamaria, Raffaele	SENSORS	2016
1	Navigation, guidance and control of an overactuated marine surface vehicle	Nad, Dula; Miskovic, Nikola; Mandic, Filip	ANNUAL REVIEWS IN CONTROL	2015
2	Field operation of a robotic small waterplane area twin hull boat for shallow-water bathymetric characterization	Kitts, Christopher; Mahacek, Paul; Adamek, Thomas; Rasal, Ketan; Howard, Vincent; Li, Steve; Badaoui, Alexi; Kirkwood, William; Wheat, Geoffrey; Hulme, Sam	JOURNAL OF FIELD ROBOTICS	2012
4	Optimum aeorelastic design of a mapping wing	Isogai, Koji; Harino, Yohei	JOURNAL OF AIRCRAFT	2007
4	Design of a high-altitude long-endurance solar-powered unmanned air vehicle for multi-payload and operations	Romeo, G.; Frulla, G.; Cestino, E.	PROCEEDINGS OF THE INSTITUTION OF MECHANICAL ENGINEERS PART G-JOURNAL OF AEROSPACE ENGINEERING	2007
4	Unmanned underwater vehicles for scientific applications and robotics research: The ROMEO Project	Caccia, M; Bono, R; Bruzzone, G; Veruggio, G	MARINE TECHNOLOGY SOCIETY JOURNAL	2000
1	Path Following of Underactuated Marine Surface Vessels in the Presence of Unknown Ocean Currents	Moe, Signe; Caharija, Walter; Pettersen, Kristin Y.; Schjolberg, Ingrid	2014 AMERICAN CONTROL CONFERENCE (ACC)	2014
1	Autonomous navigation and obstacle avoidance for unmanned surface vehicles	Larson, Jacoby; Bruch, Michael; Ebken, John	UNMANNED SYSTEMS TECHNOLOGY VIII, PTS 1 AND 2	2006
1	Adaptive Course Control-Based Trajectory Linearization Control for Uncertain Unmanned Surface Vehicle Under Rudder Saturation	Qiu, Bingbing; Wang, Guofeng; Fan, Yunsheng; Mu, Dongdong; Sun, Xiaojie	IEEE ACCESS	2019
4	Realtime edge-based visual odometry for a monocular camera	Tarrio, Juan Jose; Pedre, Sol	2015 IEEE INTERNATIONAL CONFERENCE ON COMPUTER VISION (ICCV)	2015
4	Monitoring the Algerian Basin through glider observations, satellite altimetry and numerical simulations along a SARAL/AltiKa track	Aulicino, G.; Cotroneo, Y.; Ruiz, S.; Sanchez Roman, A.; Pascual, A.; Fusco, G.; Tintore, J.; Budillon, G.	JOURNAL OF MARINE SYSTEMS	2018
1	Adaptive LOS Path Following for a Podded Propulsion Unmanned Surface Vehicle with Uncertainty of Model and Actuator Saturation	Mu, Dongdong; Wang, Guofeng; Fan, Yunsheng; Sun, Xiaojie; Qiu, Bingbing	APPLIED SCIENCES-BASEL	2017
1	The angle guidance path planning algorithms for unmanned surface vehicle formations by using the fast marching method	Liu, Yuanchang; Bucknall, Richard	APPLIED OCEAN RESEARCH	2016
4	Aerodynamics of aerofoil sections measured on a free-flying bird	Carruthers, A. C.; Walker, S. M.; Thomas, A. L. R.; Taylor, G. K.	PROCEEDINGS OF THE INSTITUTION OF MECHANICAL ENGINEERS PART G-JOURNAL OF AEROSPACE ENGINEERING	2010
4	Path planning and control for multiple point surveillance by an unmanned aircraft in wind	McGee, Timothy G.; Hedrick, J. Karl	2006 AMERICAN CONTROL CONFERENCE, VOLS 1-12	2006
1	Control of an Unmanned Surface Vehicle With Uncertain Displacement and Drag	Klinger, Wilhelm B.; Bertaska, Ivan R.; von Ellenrieder, Karl D.; Dhanak, M. R.	IEEE JOURNAL OF OCEANIC ENGINEERING	2017
1 and 2	Improving Autonomy and Control of Autonomous Surface Vehicles in Port Protection and Mine Countermeasure Scenarios	Pastore, Thomas; Djapic, Vladimir	JOURNAL OF FIELD ROBOTICS	2010
4	Aircraft flight parameter detection based on a neural network using multiple hot-film flow speed sensors	Fei, Haiping; Zhu, Rong; Zhou, Zhaoying; Wang, Jindong	SMART MATERIALS AND STRUCTURES	2007
1 and 2	Efficient multi-task allocation and path planning for unmanned surface vehicle in support of ocean operations	Liu, Yuanchang; Bucknall, Richard	NEUROCOMPUTING	2018
4	Robust neural path-following control for underactuated ships with the DVS obstacles avoidance guidance	Zhang, Guoqing; Deng, Yingjie; Zhang, Weidong	OCEAN ENGINEERING	2017
1	PATH FOLLOWING CONTROL OF THE UNDERACTUATED USV BASED ON THE IMPROVED LINE-OF-SIGHT GUIDANCE ALGORITHM	Liu, Tao; Dong, Zaopeng; Du, Hongwang; Song, Lifei; Mao, Yunsheng	POLISH MARITIME RESEARCH	2017
1	Station-keeping control of an unmanned surface vehicle exposed to current and wind disturbances	Sarda, Edoardo I.; Qu, Huajin; Bertaska, Ivan R.; von Ellenrieder, Karl D.	OCEAN ENGINEERING	2016
1	Trajectory tracking control for underactuated unmanned surface vehicles with dynamic uncertainties	Liao Yu-lei; Zhang Ming-jun; Wan Lei; Li Ye	JOURNAL OF CENTRAL SOUTH UNIVERSITY	2016
1	Local reactive obstacle avoidance approach for high-speed unmanned surface vehicle	Tang, Pingpeng; Zhang, Rubo; Liu, Deli; Huang, Lihua; Liu, Guanqun; Deng, Tingquan	OCEAN ENGINEERING	2015
2	Precision navigation and mapping under bridges with an unmanned surface vehicle	Han, Jungwook; Park, Jeonghong; Kim, Taeyun; Kim, Jinwhan	AUTONOMOUS ROBOTS	2015
1	Serret-Frenet frame based on path following control for underactuated unmanned surface vehicles with dynamic uncertainties	Liao Yu-lei; Zhang Ming-jun; Wan Lei	JOURNAL OF CENTRAL SOUTH UNIVERSITY	2015
1	Velodyne HDL-64E LIDAR for Unmanned Surface Vehicle Obstacle Detection	Halterman, Ryan; Bruch, Michael	UNMANNED SYSTEMS TECHNOLOGY XII	2010
4	Aerodynamic performance of the Smart Wing control effectors	Sanders, B; Cowan, D; Scherer, L	JOURNAL OF INTELLIGENT MATERIAL SYSTEMS AND STRUCTURES	2004
1	Autonomous terrain characterisation and modelling for dynamic control of unmanned vehicles	Talukder, A; Manduchi, R; Castano, R; Owens, K; Matthies, L; Castano, A; Hogg, R	2002 IEEE/RSJ INTERNATIONAL CONFERENCE ON INTELLIGENT ROBOTS AND SYSTEMS, VOLS 1-3, PROCEEDINGS	2002
1	Trajectory Tracking and Path Following for Underactuated Marine Vehicles	Paliotta, Claudio; Lefeber, Erjen; Pettersen, Kristin Ytterstad; Pinto, Jose; Costa, Maria; de Figueiredo Borges de Sousa, Joao Tasso	IEEE TRANSACTIONS ON CONTROL SYSTEMS TECHNOLOGY	2019
1	Smoothed A* algorithm for practical unmanned surface vehicle path planning	Song, Rui; Liu, Yuanchang; Bucknall, Richard	APPLIED OCEAN RESEARCH	2019
1	Stereovision-based target tracking system for USV operations	Sinisterra, Armando J.; Dhanak, Manhar R.; Von Ellenrieder, Karl	OCEAN ENGINEERING	2017
1	Non-linear control algorithms for an unmanned surface vehicle	Sharma, Sanjay K.; Sutton, Robert; Motwani, Amit; Annamalai, Andy	PROCEEDINGS OF THE INSTITUTION OF MECHANICAL ENGINEERS PART M-JOURNAL OF ENGINEERING FOR THE MARITIME ENVIRONMENT	2014
1	ODE-based obstacle avoidance and trajectory planning for unmanned surface vessels	Soltan, Reza A.; Ashrafiuon, Hashem; Muske, Kenneth R.	ROBOTICA	2011
4	Sonar-based iceberg-relative navigation for autonomous underwater vehicles	Kimball, Peter; Rock, Stephen	DEEP-SEA RESEARCH PART II-TOPICAL STUDIES IN OCEANOGRAPHY	2011
4	Design Overview of a Three Kilowatt Recuperated Ceramic Turboshaft Engine	Vick, Michael J.; Heyes, Andrew; Pullen, Keith	JOURNAL OF ENGINEERING FOR GAS TURBINES AND POWER-TRANSACTIONS OF THE ASME	2010
4	Daytime Water Detection Based on Color Variation	Rankin, Arturo; Matthies, Larry	IEEE/RSJ 2010 INTERNATIONAL CONFERENCE ON INTELLIGENT ROBOTS AND SYSTEMS (IROS 2010)	2010
4	Evolutionary Optimization of a Morphing Wing with Wind-Tunnel Hardware in the Loop	Boria, Frank; Stanford, Bret; Bowman, Scott; Ifju, Peter	AIAA JOURNAL	2009
4	Smart structures and actuators: Past, present, and future	Garcia, E	SMART STRUCTURES AND MATERIALS 2002: INDUSTRIAL AND COMMERCIAL APPLICATIONS OF SMART STRUCTURES TECHNOLOGIES	2002
4	Stirling technology development at NASA GRC	Thieme, LG; Schreiber, JG; Mason, LS	SPACE TECHNOLOGY AND APPLICATIONS INTERNATIONAL FORUM-STAIF 2002	2002
1	Nussbaum-Based Adaptive Fuzzy Tracking Control of Unmanned Surface Vehicles with Fully Unknown Dynamics and Complex Input Nonlinearities	Wang, Ning; Gao, Ying; Sun, Zhuo; Zheng, Zhongjiu	INTERNATIONAL JOURNAL OF FUZZY SYSTEMS	2018
1 and 2	Development of the USV 'JingHai-I' and sea trials in the Southern Yellow Sea	Peng, Yan; Yang, Yi; Cui, Jianxiang; Li, Xiaomao; Pu, Huayan; Gu, Jason; Xie, Shaorong; Luo, Jun	OCEAN ENGINEERING	2017
1	Path planning on satellite images for unmanned surface vehicles	Yang, Joe-Ming; Tseng, Chien-Ming; Tseng, P. S.	INTERNATIONAL JOURNAL OF NAVAL ARCHITECTURE AND OCEAN ENGINEERING	2015
4	A Self-learning Framework for Statistical Ground Classification using Radar and Monocular Vision	Milella, Annalisa; Reina, Giulio; Underwood, James	JOURNAL OF FIELD ROBOTICS	2015
1	An automatic COLREGs-compliant obstacle avoidance system for an unmanned surface vehicle	Campbell, Sable; Abu-Tair, Mamun; Naeem, Wasif	PROCEEDINGS OF THE INSTITUTION OF MECHANICAL ENGINEERS PART M-JOURNAL OF ENGINEERING FOR THE MARITIME ENVIRONMENT	2014
1	Dynamics-Aware Target Following for an Autonomous Surface Vehicle Operating under COLREGs in Civilian Traffic	Svec, Petr; Shah, Brual C.; Bertaska, Ivan R.; Alvarez, Jose; Sinisterra, Armando J.; von Ellenrieder, Karl; Dhanak, Manhar; Gupta, Satyandra K.	2013 IEEE/RSJ INTERNATIONAL CONFERENCE ON INTELLIGENT ROBOTS AND SYSTEMS (IROS)	2013
1	An integrated multi-sensor data fusion algorithm and autopilot implementation in an uninhabited surface craft	Naeem, Wasif; Sutton, Robert; Xu, Tao	OCEAN ENGINEERING	2012
2	Unmanned Autonomous Sailing: Current Status and Future Role in Sustained Ocean Observations	Rynne, Patrick F.; von Ellenrieder, Karl D.	MARINE TECHNOLOGY SOCIETY JOURNAL	2009
4	COLREGS-Constrained Real-time Path Planning for Autonomous Ships Using Modified Artificial Potential Fields	Lyu, Hongguang; Yin, Yong	JOURNAL OF NAVIGATION	2019
4	Ice cliff contribution to the tongue-wide ablation of Changri Nup Glacier, Nepal, central Himalaya	Brun, Fanny; Wagnon, Patrick; Berthier, Etienne; Shea, Joseph M.; Immerzeel, Walter W.; Kraaijenbrink, Philip D. A.; Vincent, Christian; Reverchon, Camille; Shrestha, Dibas; Arnaud, Yves	CRYOSPHERE	2018
1	Obstacle Avoidance Approaches for Autonomous Navigation of Unmanned Surface Vehicles	Polvara, Riccardo; Sharma, Sanjay; Wan, Jian; Manning, Andrew; Sutton, Robert	JOURNAL OF NAVIGATION	2018
1	Line-of-Sight Curved Path Following for Underactuated USVs and AUVs in the Horizontal Plane under the influence of Ocean Currents	Moe, Signe; Pettersen, Kristin Y.; Fossen, Thor I.; Gravdahl, Jan T.	2016 24TH MEDITERRANEAN CONFERENCE ON CONTROL AND AUTOMATION (MED)	2016
1	Trajectory planning and tracking control for underactuated unmanned surface vessels	Liao Yu-lei; Su Yu-min; Cao Jian	JOURNAL OF CENTRAL SOUTH UNIVERSITY	2014
1 and 2	Automated synthesis of action selection policies for unmanned vehicles operating in adverse environments	Svec, Petr; Gupta, Satyandra K.	AUTONOMOUS ROBOTS	2012
4	Neural-Network-Based Flush Air Data Sensing System Demonstrated on a Mini Air Vehicle	Samy, Ihab; Postlethwaite, Ian; Gu, Da-Wei; Green, John	JOURNAL OF AIRCRAFT	2010
1	Optimal Specification of Sliding Mode Control Parameters for Unmanned Surface Vessel Systems	McNinch, Lucas C.; Ashrafiuon, Hashem; Muske, Kenneth R.	2009 AMERICAN CONTROL CONFERENCE, VOLS 1-9	2009
1	Trajectory exponential tracking control of unmanned surface ships with external disturbance and system uncertainties	Qu, Yaohong; Xiao, Bing; Fu, Zhenzhou; Yuan, Dongli	ISA TRANSACTIONS	2018
1	A study on path optimization method of an unmanned surface vehicle under environmental loads using genetic algorithm	Kim, Heesu; Kim, Sang-Hyun; Jeon, Maro; Kim, JaeHak; Song, Soonseok; Paik, Kwang-Jun	OCEAN ENGINEERING	2017
2	A USV-Based Automated Launch and Recovery System for AUVs	Sarda, Edoardo I.; Dhanak, Manhar R.	IEEE JOURNAL OF OCEANIC ENGINEERING	2017
1	Neural adaptive steering of an unmanned surface vehicle with measurement noises	Peng, Zhouhua; Wang, Dan; Wang, Wei; Liu, Lu	NEUROCOMPUTING	2016
1	Obstacle avoidance for multi-missile network via distributed coordination algorithm	Zhao, Jiang; Zhou, Rui	CHINESE JOURNAL OF AERONAUTICS	2016
1	An effective fusion defogging approach for single sea fog image	Ma, Zhongli; Wen, Jie; Zhang, Cheng; Liu, Quanyong; Yan, Danniang	NEUROCOMPUTING	2016
1	A Reactive COLREGs-Compliant Navigation Strategy for Autonomous Maritime Navigation	Naeem, Wasif; Henrique, Sable C.; Hu, Liang	IFAC PAPERSONLINE	2016
1	Design of a Fuel-Cell-Powered Catamaran-Type Unmanned Surface Vehicle	Sohn, Seok-In; Oh, Jung-Hwan; Lee, Yeon-Seung; Park, Dae-Hwan; Oh, Il-Kwon	IEEE JOURNAL OF OCEANIC ENGINEERING	2015
1	An Autopilot Based on a Local Control Network Design for an Unmanned Surface Vehicle	Sharma, S. K.; Naeem, W.; Sutton, R.	JOURNAL OF NAVIGATION	2012
1	Adaptive navigation systems for an unmanned surface vehicle	Sutton, R.; Sharma, S.; Xao, T.	JOURNAL OF MARINE ENGINEERING AND TECHNOLOGY	2011
1	Predictive and Sliding Mode Cascade Control for Unmanned Surface Vessels	McNinch, Lucas C.; Ashrafiuon, Hashem	2011 AMERICAN CONTROL CONFERENCE	2011
4	Aerodynamic modeling of the wing-propeller interaction for a tail-sifter unmanned air vehicle	Stone, R. Hugh	JOURNAL OF AIRCRAFT	2008
1	Simulink model for hybrid power system test-bed	Knauff, M. C.; Dafis, C. J.; Niebur, D.; Kwatny, H. G.; Nwankpa, C. O.; Metzer, J.	2007 IEEE ELECTRIC SHIP TECHNOLOGIES SYMPOSIUM	2007
4	Stochastic game approach to air operations	McEneaney, WM; Fitzpatrick, BG; Lauko, IG	IEEE TRANSACTIONS ON AEROSPACE AND ELECTRONIC SYSTEMS	2004
1	Generalized velocity obstacle algorithm for preventing ship collisions at sea	Huang, Yamin; Chen, Linying; van Gelder, P. H. A. J. M.	OCEAN ENGINEERING	2019
1	Design of Adaptive Neural Tracking Controller for Pod Propulsion Unmanned Vessel Subject to Unknown Dynamics	Mu, Dong-Dong; Wang, Guo-Feng; Fan, Yun-Sheng	JOURNAL OF ELECTRICAL ENGINEERING & TECHNOLOGY	2017
1	Network-Based Heading Control and Rudder Oscillation Reduction for Unmanned Surface Vehicles	Wang, Yu-Long; Han, Qing-Long	IEEE TRANSACTIONS ON CONTROL SYSTEMS TECHNOLOGY	2017
4	Design and Optimization of a Contact-Aided Compliant Mechanism for Passive Bending	Tummala, Yashwanth; Wissa, Aimy; Frecker, Mary; Hubbard, James E.	JOURNAL OF MECHANISMS AND ROBOTICS-TRANSACTIONS OF THE ASME	2014
2	Concept design and hydrodynamic optimization of an innovative SWATH USV by CFD methods	Brizzolara, Stefano; Curtin, Tom; Bovio, Marco; Vernengo, Giuliano	OCEAN DYNAMICS	2012
1	Experimental test of a robust formation controller for marine unmanned surface vessels	Schoerling, Daniel; Van Kleeck, Chris; Fahimi, Farbod; Koch, Charles Robert; Ams, Alfons; Loeber, Peter	AUTONOMOUS ROBOTS	2010
1	Standard Linux for embedded real-time robotics and manufacturing control systems	Bruzzone, G.; Caccia, M.; Ravera, G.; Bertone, A.	ROBOTICS AND COMPUTER-INTEGRATED MANUFACTURING	2009
1	Stereo obstacle detection for unmanned surface vehicles by IMU-assisted semantic segmentation	Bovcon, Borja; Mandeljc, Rok; Pers, Janez; Kristan, Matej	ROBOTICS AND AUTONOMOUS SYSTEMS	2018
2	MICROVEGA (MICRO VESSEL FOR GEODETICS APPLICATION): A MARINE DRONE FOR THE ACQUISITION OF BATHYMETRIC DATA FOR GIS APPLICATIONS	Giordano, F.; Mattei, G.; Parente, C.; Peluso, F.; Santamaria, R.	UNDERWATER 3D RECORDING AND MODELING	2015
2	BathyBoat: An Autonomous Surface Vessel for Stand-alone Survey and Underwater Vehicle Network Supervision	Brown, Hunter C.; Jenkins, Liza K.; Meadows, Guy A.; Shuchman, Robert A.	MARINE TECHNOLOGY SOCIETY JOURNAL	2010
4	Vision based distance measurement system using single laser pointer design for underwater vehicle	Muljowidodo, K.; Rasyid, Mochammad A.; SaptoAdi, N.; Budiyono, Agus	INDIAN JOURNAL OF MARINE SCIENCES	2009
1	State-Dependent Trajectory Planning and Tracking Control of Unmanned Surface Vessels	Soltan, Reza A.; Ashrafiuon, Hashem; Muske, Kenneth R.	2009 AMERICAN CONTROL CONFERENCE, VOLS 1-9	2009
4	Fuzzy logic trajectory design and guidance for terminal area energy management	Burchett, BT	JOURNAL OF SPACECRAFT AND ROCKETS	2004
4	Deep learning-based autonomous concrete crack evaluation through hybrid image scanning	Jang, Keunyoung; Kim, Namgyu; An, Yun-Kyu	STRUCTURAL HEALTH MONITORING-AN INTERNATIONAL JOURNAL	2019
1	Adaptive Sliding Mode Trajectory Tracking Control for Unmanned Surface Vehicle with Modeling Uncertainties and Input Saturation	Qiu, Bingbing; Wang, Guofeng; Fan, Yunsheng; Mu, Dongdong; Sun, Xiaojie	APPLIED SCIENCES-BASEL	2019
1	Heading Control of Unmanned Marine Vehicles Based on an Improved Robust Adaptive Fuzzy Neural Network Control Algorithm	Dong, Zaopeng; Bao, Tao; Zheng, Mao; Yang, Xin; Song, Lifei; Mao, Yunsheng	IEEE ACCESS	2019
1	Modeling and Identification of Podded Propulsion Unmanned Surface Vehicle and Its Course Control Research	Mu, Dongdong; Wang, Guofeng; Fan, Yunsheng; Zhao, Yongsheng	MATHEMATICAL PROBLEMS IN ENGINEERING	2017
4	Resolution-adaptive risk-aware trajectory planning for surface vehicles operating in congested civilian traffic	Shah, Brual C.; Svec, Petr; Bertaska, Ivan R.; Sinisterra, Armando J.; Klinger, Wilhelm; von Ellenrieder, Karl; Dhanak, Manhar; Gupta, Satyandra K.	AUTONOMOUS ROBOTS	2016
4	Stability Augmentation and Active Flutter Suppression of a Flexible Flying-Wing Drone	Schmidt, David K.	JOURNAL OF GUIDANCE CONTROL AND DYNAMICS	2016
4	Fault tolerant attitude control for small unmanned aircraft systems equipped with an airflow sensor array	Shen, H.; Xu, Y.; Dickinson, B. T.	BIOINSPIRATION & BIOMIMETICS	2014
1	Alternative trajectory-tracking control approach for marine surface vessels with experimental verification	Fahimi, Farbod; Van Kleeck, Chris	ROBOTICA	2013
1	Improvement in Real-time Obstacle Detection System for USV	Wang, Han; Wei, Zhuo; Ow, Chek Seng; Ho, Kah Tong; Feng, Benjamin; Huang, Junjie	2012 12TH INTERNATIONAL CONFERENCE ON CONTROL, AUTOMATION, ROBOTICS & VISION (ICARCV)	2012
2	The use of autonomous vehicles for spatially measuring mean velocity profiles in rivers and estuaries	Brown, Jenna; Tuggle, Chris; MacMahan, Jamie; Reniers, Ad	INTELLIGENT SERVICE ROBOTICS	2011
1	Three-Dimensional Motion Coordination in a Spatiotemporal Flowfield	Hernandez, Sonia; Paley, Derek A.	IEEE TRANSACTIONS ON AUTOMATIC CONTROL	2010
1	Optical Flow-Based Slip and Velocity Estimation Technique for Unmanned Skid-Steered Vehicles	Song, Xiaojing; Song, Zibin; Seneviratne, Lakmal D.; Althoefer, Kaspar	2008 IEEE/RSJ INTERNATIONAL CONFERENCE ON ROBOTS AND INTELLIGENT SYSTEMS, VOLS 1-3, CONFERENCE PROCEEDINGS	2008
1	Modeling framework for six degree-of-freedom control of Unmanned Sea Surface Vehicles	Krishnamurthy, P.; Khorrami, F.; Fujikawa, S.	2005 44TH IEEE CONFERENCE ON DECISION AND CONTROL & EUROPEAN CONTROL CONFERENCE, VOLS 1-8	2005
4	Cooperative radar jamming for groups of unmanned air vehicles	Kim, J; Hespanha, JP	2004 43RD IEEE CONFERENCE ON DECISION AND CONTROL (CDC), VOLS 1-5	2004
1	State recovery and disturbance estimation of unmanned surface vehicles based on nonlinear extended state observers	Liu, Lu; Wang, Dan; Peng, Zhouhua	OCEAN ENGINEERING	2019
1	A survey of formation control and motion planning of multiple unmanned vehicles	Liu, Yuanchang; Bucknall, Richard	ROBOTICA	2018
1	Course keeping Control Based on Integrated Nonlinear Feedback for a USV with Pod-like Propulsion	Fan, Yunsheng; Mu, Dongdong; Zhang, Xianku; Wang, Guofeng; Guo, Chen	JOURNAL OF NAVIGATION	2018
4	Vision-Based Corrosion Detection Assisted by a Micro-Aerial Vehicle in a Vessel Inspection Application	Ortiz, Alberto; Bonnin-Pascual, Francisco; Garcia-Fidalgo, Emilio; Company-Corcoles, Joan P.	SENSORS	2016
4	The Use of Ship-Launched Fixed-Wing UAVs for Measuring the Marine Atmospheric Boundary Layer and Ocean Surface Processes	Reineman, Benjamin D.; Lenain, Luc; Melville, W. Kendall	JOURNAL OF ATMOSPHERIC AND OCEANIC TECHNOLOGY	2016
1	Coordinated formation control design with obstacle avoidance in three-dimensional space	Chang, Kai; Xia, Yuanqing; Huang, Kaoli	JOURNAL OF THE FRANKLIN INSTITUTE-ENGINEERING AND APPLIED MATHEMATICS	2015
1	A Robust, Opportunistic Clock Synchronization Algorithm for Ad Hoc Underwater Acoustic Networks	Vermeij, Arjan; Munafo, Andrea	IEEE JOURNAL OF OCEANIC ENGINEERING	2015
1	Underwater Acoustic Navigation Using a Beacon With a Spiral Wave Front	Dzikowicz, Benjamin R.; Hefner, Brian T.; Leasko, Robert A.	IEEE JOURNAL OF OCEANIC ENGINEERING	2015
1	The Obstacle Avoidance Planning of USV Based on Improved Artificial Potential Field	Xie, Shaorong; Wu, Peng; Peng, Yan; Luo, Jun; Qu, Dong; Li, Qingmei; Gu, Jason	2014 IEEE INTERNATIONAL CONFERENCE ON INFORMATION AND AUTOMATION (ICIA)	2014
4	CAPTURE: A Communications Architecture for Progressive Transmission via Underwater Relays With Eavesdropping	Murphy, Chris; Walls, Jeffrey M.; Schneider, Toby; Eustice, Ryan M.; Stojanovic, Milica; Singh, Hanumant	IEEE JOURNAL OF OCEANIC ENGINEERING	2014
3	Unmanned Maritime Vehicles: Technology Evolution and Implications	Martin, Antoine Y.	MARINE TECHNOLOGY SOCIETY JOURNAL	2013
1	Trajectory Planning with Look-Ahead for Unmanned Sea Surface Vehicles to Handle Environmental Disturbances	Svec, Petr; Schwartz, Maxim; Thakur, Atul; Gupta, Satyandra K.	2011 IEEE/RSJ INTERNATIONAL CONFERENCE ON INTELLIGENT ROBOTS AND SYSTEMS	2011
1	Shore Construction Detection by Automotive Radar for the Needs of Autonomous Surface Vehicle Navigation	Stateczny, Andrzej; Kazimierski, Witold; Burdziakowski, Pawel; Motyl, Weronika; Wisniewska, Marta	ISPRS INTERNATIONAL JOURNAL OF GEO-INFORMATION	2019
3	A Survey on Unmanned Surface Vehicles for Disaster Robotics: Main Challenges and Directions	Jorge, Vitor A. M.; Granada, Roger; Maidana, Renan G.; Jurak, Darlan A.; Heck, Guilherme; Negreiros, Alvaro P. F.; dos Santos, Davi H.; Goncalves, Luiz M. G.; Amory, Alexandre M.	SENSORS	2019
1	Ship collision avoidance methods: State-of-the-art	Huang, Yamin; Chen, Linying; Chen, Pengfei; Negenborn, Rudy R.; van Gelder, P. H. A. J. M.	SAFETY SCIENCE	2019
1	Tracking Control of Podded Propulsion Unmanned Surface Vehicle with Unknown Dynamics and Disturbance Under Input Saturation	Mu, Dong Dong; Wang, Guo Feng; Fan, Yun Sheng	INTERNATIONAL JOURNAL OF CONTROL AUTOMATION AND SYSTEMS	2018
1	An energy-efficient path planning algorithm for unmanned surface vehicles	Niu, Hanlin; Lu, Yu; Savvaris, Al; Tsourdos, Antonios	OCEAN ENGINEERING	2018
2	Heterogeneous water storage and thermal regime of supraglacial ponds on debris-covered glaciers	Watson, Cameron Scott; Quincey, Duncan J.; Carrivick, Jonathan L.; Smith, Mark W.; Rowan, Ann V.; Richardson, Robert	EARTH SURFACE PROCESSES AND LANDFORMS	2018
1	Global Terminal Sliding Mode Control With the Quick Reaching Law and Its Application	Xiu, Chunbo; Guo, Penghui	IEEE ACCESS	2018
1	Vision-based navigation of an unmanned surface vehicle with object detection and tracking abilities	Shin, Bok-Suk; Mou, Xiaozheng; Mou, Wei; Wang, Han	MACHINE VISION AND APPLICATIONS	2018
4	Health structure monitoring for the design of an innovative UAS fixed wing through inverse finite element method (iFEM)	Papa, Umberto; Russo, Salvatore; Lamboglia, Angelo; Del Core, Giuseppe; Iannuzzo, Generoso	AEROSPACE SCIENCE AND TECHNOLOGY	2017
1	The fast marching method based intelligent navigation of an unmanned surface vehicle	Liu, Yuanchang; Bucknall, Richard; Zhang, Xinyu	OCEAN ENGINEERING	2017
2	Advances in Ecosystem Research: Saildrone Surveys of Oceanography, Fish, and Marine Mammals in the Bering Sea	Mordy, Calvin W.; Cokelet, Edward D.; De Robertis, Alex; Jenkins, Richard; Kuhn, Carey E.; Lawrence-Slavas, Noah; Berchok, Catherine L.; Crance, Jessica L.; Sterling, Jeremy T.; Cross, Jessica N.; Stabeno, Phyllis J.; Meinig, Christian; Tabisola, Heather M.; Burgess, William; Wangen, Ivar	OCEANOGRAPHY	2017
2	Designing the NGC system of a small ASV for tracking underwater targets	Conte, G.; De Capua, G. P.; Scaradozzi, D.	ROBOTICS AND AUTONOMOUS SYSTEMS	2016
1	Set-Based Line-of-Sight (LOS) Path Following with Collision Avoidance for Underactuated Unmanned Surface Vessel	Moe, Signe; Pettersen, Kristin Y.	2016 24TH MEDITERRANEAN CONFERENCE ON CONTROL AND AUTOMATION (MED)	2016
4	The Pilatus unmanned aircraft system for lower atmospheric research	de Boer, Gijs; Palo, Scott; Argrow, Brian; LoDolce, Gabriel; Mack, James; Gao, Ru-Shan; Telg, Hagen; Trussel, Cameron; Fromm, Joshua; Long, Charles N.; Bland, Geoff; Maslanik, James; Schmid, Beat; Hock, Terry	ATMOSPHERIC MEASUREMENT TECHNIQUES	2016
2	Model-predictive asset guarding by team of autonomous surface vehicles in environment with civilian boats	Raboin, Eric; Svec, Petr; Nau, Dana S.; Gupta, Satyandra K.	AUTONOMOUS ROBOTS	2015
4	Autonomous terrain-following for unmanned air vehicles	Samar, Raza; Rehman, Abdur	MECHATRONICS	2011
1	Line Following Guidance Control: Application to the Charlie Unmanned Surface Vehicle	Bibuli, M.; Bruzzone, G.; Caccia, M.; Indiveri, G.; Zizzari, A. A.	2008 IEEE/RSJ INTERNATIONAL CONFERENCE ON ROBOTS AND INTELLIGENT SYSTEMS, VOLS 1-3, CONFERENCE PROCEEDINGS	2008
1	A multilayer path planner for a USV under complex marine environments	Wang, Ning; Jin, Xiaozhao; Er, Meng Joo	OCEAN ENGINEERING	2019
1	An Improved Genetic Algorithm for Path-Planning of Unmanned Surface Vehicle	Xin, Junfeng; Zhong, Jiabao; Yang, Fengru; Cui, Ying; Sheng, Jinlu	SENSORS	2019
1	Heading MFA control for unmanned surface vehicle with angular velocity guidance	Li, Ye; Wang, Leifeng; Liao, Yulei; Jiang, Quanquan; Pan, Kaiwen	APPLIED OCEAN RESEARCH	2018
4	epsilon*: An Online Coverage Path Planning Algorithm	Song, Junnan; Gupta, Shalabh	IEEE TRANSACTIONS ON ROBOTICS	2018
1	Motion planning for Unmanned Surface Vehicle based on Trajectory Unit	Du, Zhe; Wen, Yuanqiao; Xiao, Changshi; Zhang, Fan; Huang, Liang; Zhou, Chunhui	OCEAN ENGINEERING	2018
1	Saturated coordinated control of multiple underactuated unmanned surface vehicles over a closed curve	Liu, Lu; Wang, Dan; Peng, Zhouhua; Liu, Hugh H. T.	SCIENCE CHINA-INFORMATION SCIENCES	2017
4	Aeronautical livery coating with icephobic property	Mazzola, L.	SURFACE ENGINEERING	2016
4	SWARM INTELLIGENCE APPROACH TO SAFE SHIP CONTROL	Lazarowska, Agnieszka	POLISH MARITIME RESEARCH	2015
1	Review of Course Keeping Control System for Unmanned Surface Vehicle	Azzeri, M. N.; Adnan, F. A.; Zain, M. Z. Md.	JURNAL TEKNOLOGI	2015
1	Reliability growth by failure mode removal	Gaver, Donald P.; Jacobs, Patricia A.	RELIABILITY ENGINEERING & SYSTEM SAFETY	2014
1	Swarm-based path-following for cooperative unmanned surface vehicles	Bibuli, Marco; Bruzzone, Gabriele; Caccia, Massimo; Gasparri, Andrea; Priolo, Attilio; Zereik, Enrica	PROCEEDINGS OF THE INSTITUTION OF MECHANICAL ENGINEERS PART M-JOURNAL OF ENGINEERING FOR THE MARITIME ENVIRONMENT	2014
4	Conceptual Design of Future Undersea Unmanned Vehicle (UUV) System for Mine Disposal	Song, Kwang sub; Chu, Peter C.	IEEE SYSTEMS JOURNAL	2014
1	Ant Colony Optimization based navigational decision support system	Lazarowska, Agnieszka	KNOWLEDGE-BASED AND INTELLIGENT INFORMATION & ENGINEERING SYSTEMS 18TH ANNUAL CONFERENCE, KES-2014	2014
1	Intelligent Navigation for a Solar Powered Unmanned Underwater Vehicle	Garcia-Cordova, Francisco; Guerrero-Gonzalez, Antonio	INTERNATIONAL JOURNAL OF ADVANCED ROBOTIC SYSTEMS	2013
4	Static and Forced-Oscillation Tests of a Generic Unmanned Combat Air Vehicle	Vicroy, Dan D.; Loeser, Thomas D.; Schuette, Andreas	JOURNAL OF AIRCRAFT	2012
1	Combined Speed and Yaw Control of Underactuated Unmanned Surface Vehicles	Liao, Yulei; Pang, Yongjie; Wan, Lei	2010 2ND INTERNATIONAL ASIA CONFERENCE ON INFORMATICS IN CONTROL, AUTOMATION AND ROBOTICS (CAR 2010), VOL 1	2010
4	Autonomous Car Fuzzy Control Modeled by Iterative Genetic Algorithms	Onieva, Enrique; Alonso, Javier; Perez, Joshue; Milanes, Vicente; de Pedro, Teresa	2009 IEEE INTERNATIONAL CONFERENCE ON FUZZY SYSTEMS, VOLS 1-3	2009
4	Tailored dynamic gain-scheduled control	Jones, C. D. C.; Lowenberg, M. H.; Richardson, T. S.	JOURNAL OF GUIDANCE CONTROL AND DYNAMICS	2006
1	Linear optoacoustic underwater communication	Blackmon, F; Estes, L; Fain, G	APPLIED OPTICS	2005
4	Application of smart material-hydraulic actuators	Anderson, EH; Bales, GL; White, EV	SMART STRUCTURES AND MATERIALS 2003: INDUSTRIAL AND COMMERCIAL APPLICATIONS OF SMART STRUCTURES TECHNOLOGIES	2003
4	UUV teams, control from a biological perspective	McDowell, P; Chen, J; Bourgeois, B	OCEANS 2002 MTS/IEEE CONFERENCE & EXHIBITION, VOLS 1-4, CONFERENCE PROCEEDINGS	2002
4	Mars rocket vehicle using in situ propellants	Landis, GA; Linne, DL	JOURNAL OF SPACECRAFT AND ROCKETS	2001
4	Motion-based compression of underwater video imagery for the operations of unmanned submersible vehicles	Negahdaripour, S	COMPUTER VISION AND IMAGE UNDERSTANDING	2000
1	Survey on Communication and Networks for Autonomous Marine Systems	Zolich, Artur; Palma, David; Kansanen, Kimmo; Fjortoft, Kay; Sousa, Joao; Johansson, Karl H.; Jiang, Yuming; Dong, Hefeng; Johansen, Tor A.	JOURNAL OF INTELLIGENT & ROBOTIC SYSTEMS	2019
1	Dynamic model identification of unmanned surface vehicles using deep learning network	Woo, Joohyun; Park, Jongyoung; Yu, Chanwoo; Kim, Nakwan	APPLIED OCEAN RESEARCH	2018
1	Optimal path planning of unmanned surface vehicles	Singh, Yogang; Sharma, Sanjay; Hatton, Daniel; Sutton, Robert	INDIAN JOURNAL OF GEO-MARINE SCIENCES	2018
4	Morphing and growing micro unmanned air vehicle: Sizing process and stability	Hassanalian, M.; Quintana, A.; Abdelkefi, A.	AEROSPACE SCIENCE AND TECHNOLOGY	2018
2	Weather-Induced Transport through a Tidal Channel Calibrated by an Unmanned Boat	Li, Chunyan; Weeks, Eddie; Huang, Wei; Milan, Brian; Wu, Renhao	JOURNAL OF ATMOSPHERIC AND OCEANIC TECHNOLOGY	2018
1	An Automatic Navigation System for Unmanned Surface Vehicles in Realistic Sea Environments	Sun, Xiaojie; Wang, Guofeng; Fan, Yunsheng; Mu, Dongdong; Qiu, Bingbing	APPLIED SCIENCES-BASEL	2018
1	A task-based hierarchical control strategy for autonomous motion of an unmanned surface vehicle swarm	Qin, Zihe; Lin, Zhuang; Yang, Dongmei; Li, Ping	APPLIED OCEAN RESEARCH	2017
1	Nonlinear Modeling for a Water-Jet Propulsion USV: An Experimental Study	Han, Jianda; Xiong, Junfeng; He, Yuqing; Gu, Feng; Li, Decai	IEEE TRANSACTIONS ON INDUSTRIAL ELECTRONICS	2017
1	Autonomous obstacle avoidance of an unmanned surface vehicle based on cooperative manoeuvring	Wu, Peng; Xie, Shaorong; Liu, Hengli; Li, Ming; Li, Hengyu; Peng, Yan; Li, Xiaomao; Luo, Jun	INDUSTRIAL ROBOT-AN INTERNATIONAL JOURNAL	2017
2	INFORMATION ABOUT DYNAMICS OF THE SEA SURFACE AS A MEANS TO IMPROVE SAFETY OF THE UNMANNED VESSEL AT SEA	Przyborski, Marek	POLISH MARITIME RESEARCH	2016
4	Platinum Nanoparticle Decorated SiO2 Microfibers as Catalysts for Micro Unmanned Underwater Vehicle Propulsion	Chen, Bolin; Garland, Nathaniel T.; Geder, Jason; Pruessner, Marius; Mootz, Eric; Cargill, Allison; Leners, Anne; Vokshi, Granit; Davis, Jacob; Burns, Wyatt; Daniele, Michael A.; Kogot, Josh; Medintz, Igor L.; Claussen, Jonathan C.	ACS APPLIED MATERIALS & INTERFACES	2016
1	A Sea-Sky Line Detection Method for Unmanned Surface Vehicles Based on Gradient Saliency	Wang, Bo; Su, Yumin; Wan, Lei	SENSORS	2016
1	Design and Implementation of a Control System for a Sailboat Robot	Santos, Davi; Silva Junior, Andouglas G.; Negreiros, Alvaro; Boas, Joao Vilas; Alvarez, Justo; Araujo, Andre; Aroca, Rafael Vidal; Goncalves, Luiz M. G.	ROBOTICS	2016
1	Efficient Path Planning Algorithms for Unmanned Surface Vehicle	Niu, Hanlin; Lu, Yu; Savvaris, Al; Tsourdos, Antonios	IFAC PAPERSONLINE	2016
4	Application of the method of splitting by physical processes for the computation of a hypersonic flow over an aircraft model of complex configuration	Zheleznyakova, A. L.; Surzhikov, S. T.	HIGH TEMPERATURE	2013
1	Stereovision Based Obstacle Detection System for Unmanned Surface Vehicle	Wang, Han; Wei, Zhuo	2013 IEEE INTERNATIONAL CONFERENCE ON ROBOTICS AND BIOMIMETICS (ROBIO)	2013
1	Modeling and optimization of a hybrid power system for an unmanned surface vehicle	Khare, Neeta; Singh, Pritpal	JOURNAL OF POWER SOURCES	2012
1	Development of a Flexible Command and Control Software Architecture for Marine Robotic Applications	Bingham, Brian S.; Walls, Jeffrey M.; Eustice, Ryan M.	MARINE TECHNOLOGY SOCIETY JOURNAL	2011
4	Using space manifold dynamics to deploy a small satellite constellation around the Moon	Marson, Riccardo; Pontani, Mauro; Perozzi, Ettore; Teofilatto, Paolo	CELESTIAL MECHANICS & DYNAMICAL ASTRONOMY	2010
4	Microscale packed bed reactor for controlled hydrogen peroxide decomposition as a fuel cell oxidant aboard unmanned undersea vehicles	Lennon, E.; Burke, A. A.; Ocampo, M.; Besser, R. S.	JOURNAL OF POWER SOURCES	2010
4	Near-surface topology of unmanned combat air vehicle planform: Reynolds number dependence	Elkhoury, M; Yavuz, MM; Rockwell, D	JOURNAL OF AIRCRAFT	2005
1	Assessment of the Steering Precision of a Hydrographic Unmanned Surface Vessel (USV) along Sounding Profiles Using a Low-Cost Multi-Global Navigation Satellite System (GNSS) Receiver Supported Autopilot	Specht, Mariusz; Specht, Cezary; Lasota, Henryk; Cywinski, Piotr	SENSORS	2019
4	Behaviour reactions of bottlenose dolphins (Tursiops truncatus) to multirotor Unmanned Aerial Vehicles (UAVs)	Fettermann, Ticiana; Fiori, Lorenzo; Bader, Martin; Doshi, Ashray; Breen, Dan; Stockin, Karen A.; Bollard, Barbara	SCIENTIFIC REPORTS	2019
1	UNIVERSAL AUTONOMOUS CONTROL AND MANAGEMENT SYSTEM FOR MULTIPURPOSE UNMANNED SURFACE VESSEL	Stateczny, Andrzej; Burdziakowski, Pawel	POLISH MARITIME RESEARCH	2019
4	Load-bearing supercapacitor based on bicontinuous PEO-b-P(S-co-DVB) structural electrolyte integrated with conductive nanowire-carbon fiber electrodes	Bae, Seok-Hu; Jeon, Choongseop; Oh, Saewoong; Kim, Chun-Gon; Seo, Myungeun; Oh, Il-Kwon	CARBON	2018
1	Modeling and Identification for Vector Propulsion of an Unmanned Surface Vehicle: Three Degrees of Freedom Model and Response Model	Mu, Dongdong; Wang, Guofeng; Fan, Yunsheng; Sun, Xiaojie; Qiu, Bingbing	SENSORS	2018
2	Multibeam Echosounder and LiDAR in Process of 360 degrees Numerical Map Production for Restricted Waters with HydroDron	Stateczny, Andrzej; Wlodarczyk-Sielicka, Marta; Gronska, Daria; Motyl, Weronika	2018 BALTIC GEODETIC CONGRESS (BGC-GEOMATICS 2018)	2018
1	A Two Layered Optimal Approach towards Cooperative Motion Planning of Unmanned Surface Vehicles in a Constrained Maritime Environment	Bibuli, Marco; Singh, Yogang; Sharma, Sanjay; Sutton, Robert; Hatton, Daniel; Khan, Asiya	IFAC PAPERSONLINE	2018
1	Radar-based collision avoidance for unmanned surface vehicles	Zhuang Jia-yuan; Zhang Lei; Zhao Shi-qi; Cao Jian; Wang Bo; Sun Han-bing	CHINA OCEAN ENGINEERING	2016
4	Diving control of underactuated unmanned undersea vehicle using integral-fast terminal sliding mode control	Yan Zhe-ping; Yu Hao-miao; Hou Shu-ping	JOURNAL OF CENTRAL SOUTH UNIVERSITY	2016
4	Passive target tracking of marine traffic ships using onboard monocular camera for unmanned surface vessel	Park, Jeonghong; Kim, Jinwhan; Son, Nam-sun	ELECTRONICS LETTERS	2015
2	Preparing the automatic spill recovery by two unmanned boats towing a boom: Development with scale experiments	Giron-Sierra, Jose M.; Gheorghita, Alina T.; Angulo, Guillermo; Jimenez, Juan F.	OCEAN ENGINEERING	2015
1	An Algorithm to Identify Docking Locations for Autonomous Surface Vessels from 3-D LiDAR Scans	Esposito, Joel M.; Graves, Mitchell	2014 IEEE INTERNATIONAL CONFERENCE ON TECHNOLOGIES FOR PRACTICAL ROBOT APPLICATIONS (TEPRA)	2014
4	Multisensor system for the protection of critical infrastructure of seaport	Kastek, Mariusz; Dulski, Rafal; Zyczkowski, Marek; Szustakowski, Mieczyslaw; Trzaskawka, Piotr; Ciurapinski, Wieslaw; Grelowska, Grazyna; Gloza, Ignacy; Milewski, Stanislaw; Listewnik, Karol	UNATTENDED GROUND, SEA, AND AIR SENSOR TECHNOLOGIES AND APPLICATIONS XIV	2012
1	Motion Planning of USV Based on Marine Rules	Zhuang, Jia-yuan; Su, Yu-min; Liao, Yu-lei; Sun, Han-bing	CEIS 2011	2011
4	Real Time 3D Terrain Elevation Mapping Using Ants Optimization Algorithm and Stereo Vision	Cappalunga, Andrea; Cattani, Stefano; Broggi, Alberto; McDaniel, Michael S.; Dutta, Susmita	2010 IEEE INTELLIGENT VEHICLES SYMPOSIUM (IV)	2010
1	ADAPTIVE UKF BASED TRACKING CONTROL FOR UNMANNED TRIMARAN VEHICLES	Peng, Yan; Han, Jianda; Huang, Qingjiu	INTERNATIONAL JOURNAL OF INNOVATIVE COMPUTING INFORMATION AND CONTROL	2009
2	An Unmanned Surface Vehicle for Multi-mission Applications	Wang, Jianhua; Gu, Wei; Zhu, Jianxin; Zhang, Jubiao	ICECT: 2009 INTERNATIONAL CONFERENCE ON ELECTRONIC COMPUTER TECHNOLOGY, PROCEEDINGS	2009
1	Sliding mode formation control for under-actuated autonomous surface vehicles	Fahimi, Farbod	2006 AMERICAN CONTROL CONFERENCE, VOLS 1-12	2006
4	Ridge-valley path planning for 3D terrains	Page, D. L.; Koschan, A. F.; Abidi, M. A.; Overholt, J. L.	2006 IEEE INTERNATIONAL CONFERENCE ON ROBOTICS AND AUTOMATION (ICRA), VOLS 1-10	2006
4	Operational use of guided reentry capsules - system design solutions and mission safety considerations	Burkhardt, J; Zimmermann, F; Schottle, UM	AEROSPACE SCIENCE AND TECHNOLOGY	2004
4	Real-time tracking magnetic gradiometer for underwater mine detection	Kumar, S; Perry, AR; Moeller, CR; Skvoretz, DC; Ebbert, MJ; Ostrom, R; Bennett, SL; Czipott, PV	OCEANS '04 MTS/IEEE TECHNO-OCEAN '04, VOLS 1- 2, CONFERENCE PROCEEDINGS, VOLS. 1-4	2004
1	The Empirical Application of Automotive 3D Radar Sensor for Target Detection for an Autonomous Surface Vehicle's Navigation	Stateczny, Andrzej; Kazimierski, Witold; Gronska-Sledz, Daria; Motyl, Weronika	REMOTE SENSING	2019
4	Increased Flexibility in Polyimide Aerogels Using Aliphatic Spacers in the Polymer Backbone	Pantoja, Marcos; Boynton, Nicholas; Cavicchi, Kevin A.; Dosa, Bushara; Cashman, Jessica L.; Meador, Mary Ann B.	ACS APPLIED MATERIALS & INTERFACES	2019
1	Fast Path Planning for Autonomous Ships in Restricted Waters	Lyu, Hongguang; Yin, Yong	APPLIED SCIENCES-BASEL	2018
4	Mobile Robot Path Planning with a Non-Dominated Sorting Genetic Algorithm	Xue, Yang	APPLIED SCIENCES-BASEL	2018
1	Design, simulation and experimental evaluation of energy system for an unmanned surface vehicle	Makhsoos, Ashkan; Mousazadeh, Hossein; Mohtasebi, Seyed Saeid; Abdollahzadeh, Mohammadreza; Jafarbiglu, Hamid; Omrani, Elham; Salmani, Yousef; Kiapey, Ali	ENERGY	2018
4	Design of 2-degrees-of-freedom (DOF) planar translational mechanisms with parallel linear motion elements for an automatic docking device	Yang, Yi; Peng, Yan; Pu, Huayan; Cheng, Qixing	MECHANISM AND MACHINE THEORY	2018
4	Cooperative adaptive guidance and control paradigm for marine robots in an emergency ship towing scenario	Bruzzone, G.; Bibuli, M.; Zereik, E.; Ranieri, A.; Caccia, M.	INTERNATIONAL JOURNAL OF ADAPTIVE CONTROL AND SIGNAL PROCESSING	2017
1	Performance Enhancement of a USV INS/CNS/DVL Integration Navigation System Based on an Adaptive Information Sharing Factor Federated Filter	Wang, Qiuying; Cui, Xufei; Li, Yibing; Ye, Fang	SENSORS	2017
2	Water Surface Height Determination with a GPS Wave Glider: A Demonstration in Loch Ness, Scotland	Maqueda, M. A. Morales; Penna, N. T.; Williams, S. D. P.; Foden, P. R.; Martin, I.; Pugh, J.	JOURNAL OF ATMOSPHERIC AND OCEANIC TECHNOLOGY	2016
1	Dynamic modeling of wave driven unmanned surface vehicle in longitudinal profile based on D-H approach	Tian Bao-qiang; Yu Jian-cheng; Zhang Ai-qun	JOURNAL OF CENTRAL SOUTH UNIVERSITY	2015
4	Bottom-following control for an underactuated unmanned undersea vehicle using integral-terminal sliding mode control	Yan Zhe-Ping; Yu Hao-Miao; Li Ben-Yin	JOURNAL OF CENTRAL SOUTH UNIVERSITY	2015
1	On Fuzzy Self-adaptive PID Control for USV Course	Fan Yunsheng; Sun Xiaojie; Wang Guofeng; Guo Chen	2015 34TH CHINESE CONTROL CONFERENCE (CCC)	2015
4	3D LIDAR-based Intersection Recognition and Road Boundary Detection Method for Unmanned Ground Vehicle	Zhang, Yihuan; Wang, Jun; Wang, Xiaonian; Li, Chaocheng; Wang, Liang	2015 IEEE 18TH INTERNATIONAL CONFERENCE ON INTELLIGENT TRANSPORTATION SYSTEMS	2015
1 and 2	Robotic Simulation of Dynamic Plume Tracking by Unmanned Surface Vessels	Fahad, Muhammad; Saul, Nathaniel; Guo, Yi; Bingham, Brian	2015 IEEE INTERNATIONAL CONFERENCE ON ROBOTICS AND AUTOMATION (ICRA)	2015
4	Development and experimental validation of an improved pressure-sinkage model for small-wheeled vehicles on dilative, deformable terrain	Meirion-Griffith, G.; Nie, C.; Spenko, M.	JOURNAL OF TERRAMECHANICS	2014
4	Trajectory Planning and Control for Airport Snow Sweeping by Autonomous Formations of Ploughs	Saska, Martin; Vonasek, Vojtech; Preucil, Libor	JOURNAL OF INTELLIGENT & ROBOTIC SYSTEMS	2013
1	Model-Predictive Target Defense by Team of Unmanned Surface Vehicles Operating in Uncertain Environments	Raboin, Eric; Svec, Petr; Nau, Dana; Gupta, Satyandra K.	2013 IEEE INTERNATIONAL CONFERENCE ON ROBOTICS AND AUTOMATION (ICRA)	2013
1	Modelling and Identification of a Twin Hull-Based Autonomous Surface Craft	Wirtensohn, Stefan; Reuter, Johannes; Blaich, Michael; Schuster, Michael; Hamburger, Oliver	2013 18TH INTERNATIONAL CONFERENCE ON METHODS AND MODELS IN AUTOMATION AND ROBOTICS (MMAR)	2013
1	An Obstacle Avoidance Algorithm Designed for USV Based on Single Beam Sonar and Fuzzy Control	Chen, Jie; Pan, Wei; Guo, Yinbin; Huang, Chaoxi; Wu, Haitao	2013 IEEE INTERNATIONAL CONFERENCE ON ROBOTICS AND BIOMIMETICS (ROBIO)	2013
4	UNMANNED RECOVERY OF AN AUV FROM A SURFACE PLATFORM MANUSCRIPT, OCEANS '13 MTS/IEEE SAN DIEGO	Sarda, Edoardo; Dhanak, Manhar	2013 OCEANS - SAN DIEGO	2013
1	Architecture of the Control System of an Unmanned Surface Vehicle in the Process of Harbour Protection	Kitowski, Zygmunt	MECHATRONIC SYSTEMS, MECHANICS AND MATERIALS	2012
1	Real-Time Dynamics Simulation of Unmanned Sea Surface Vehicle for Virtual Environments	Thakur, Atul; Gupta, Satyandra K.	JOURNAL OF COMPUTING AND INFORMATION SCIENCE IN ENGINEERING	2011
4	Pool Fire Extinction by Remotely Controlled Application of Liquid Nitrogen	Levendis, Yiannis A.; Delichatsios, Michael A.	PROCESS SAFETY PROGRESS	2011
1	Hierarchical Control and Obstacle Avoidance System for Unmanned Sea Surface Vehicles	Krishnamurthy, P.; Khorrami, F.	2011 50TH IEEE CONFERENCE ON DECISION AND CONTROL AND EUROPEAN CONTROL CONFERENCE (CDC-ECC)	2011
4	Daytime Water Detection Based on Sky Reflections	Rankin, Arturo L.; Matthies, Larry H.; Bellutta, Paolo	2011 IEEE INTERNATIONAL CONFERENCE ON ROBOTICS AND AUTOMATION (ICRA)	2011
1	Intelligent Autonomy for Unmanned Surface and Underwater Vehicles	Huntsberger, Terry; Woodward, Gail	OCEANS 2011	2011
4	A study on the design and manufacturing of a deep-sea unmanned underwater vehicle based on structural reliability analysis	Joung, T. -H.; Lee, J. -H.; Nho, In-Sik; Kim, Bong-Jae; Han, Seung-Ho; Park, Seong-Hwan; Lee, Chong-Moo; Lee, Pan-Mook; Sammut, Karl; He, Fangpo	SHIPS AND OFFSHORE STRUCTURES	2009
1	Applying unmanned ground vehicle technologies to unmanned surface vehicles	Ebken, J; Bruch, M; Lum, J	Unmanned Ground Vehicle Technology VII	2005
2	Design of a small, multi-purpose, autonomous surface vessel	Leonessa, A; Mandello, J; Morel, Y; Vidal, M	OCEANS 2003 MTS/IEEE: CELEBRATING THE PAST...TEAMING TOWARD THE FUTURE	2003
1	Adaptive Neural Network Control of Underactuated Surface Vessels With Guaranteed Transient Performance: Theory and Experimental Results	Chen, Lepeng; Cui, Rongxin; Yang, Chenguang; Yan, Weisheng	IEEE TRANSACTIONS ON INDUSTRIAL ELECTRONICS	2020
4	Ship predictive collision avoidance method based on an improved beetle antennae search algorithm	Xie, Shuo; Chu, Xiumin; Zheng, Mao; Liu, Chenguang	OCEAN ENGINEERING	2019
1	Collision Avoidance Planning Method of USV Based on Improved Ant Colony Optimization Algorithm	Wang, Hongjian; Guo, Feng; Yao, Hongfei; He, Shanshan; Xu, Xin	IEEE ACCESS	2019
1	Experimental Evaluation of Supervisory Switching Control for Unmanned Surface Vehicles	Bertaska, Ivan R.; von Ellenrieder, Karl D.	IEEE JOURNAL OF OCEANIC ENGINEERING	2019
2	Sensing the Submerged Landscape of Nisida Roman Harbour in the Gulf of Naples from Integrated Measurements on a USV	Mattei, Gaia; Troisi, Salvatore; Aucelli, Pietro P. C.; Pappone, Gerardo; Peluso, Francesco; Stefanile, Michele	WATER	2018
1	Coarse-Fine-Stitched: A Robust Maritime Horizon Line Detection Method for Unmanned Surface Vehicle Applications	Sun, Yuan; Fu, Li	SENSORS	2018
2	A novel ocean bathymetry technology based on an unmanned surface vehicle	Jin Jiucai; Zhang Jie; Shao Feng; Lyu Zhichao; Wang Dong	ACTA OCEANOLOGICA SINICA	2018
2	Sea Surface Height Measurement Using a GNSS Wave Glider	Penna, Nigel T.; Maqueda, Miguel A. Morales; Martin, Ian; Guo, Jing; Foden, Peter R.	GEOPHYSICAL RESEARCH LETTERS	2018
1	Adaptive Trajectory Tracking Control for Underactuated Unmanned Surface Vehicle Subject to Unknown Dynamics and Time-Varing Disturbances	Mu, Dongdong; Wang, Guofeng; Fan, Yunsheng; Qiu, Bingbing; Sun, Xiaojie	APPLIED SCIENCES-BASEL	2018
4	A Probabilistic and Highly Efficient Topology Control Algorithm for Underwater Cooperating AUV Networks	Li, Ning; Curuklu, Baran; Bastos, Joaquim; Sucasas, Victor; Sanchez Fernandez, Jose Antonio; Rodriguez, Jonathan	SENSORS	2017
1	Predictive navigation of unmanned surface vehicles in a dynamic maritime environment when using the fast marching method	Liu, Yuanchang; Liu, Wenwen; Song, Rui; Bucknall, Richard	INTERNATIONAL JOURNAL OF ADAPTIVE CONTROL AND SIGNAL PROCESSING	2017
1	SIMULATION ON LOCAL OBSTACLE AVOIDANCE ALGORITHM FOR UNMANNED SURFACE VEHICLE	Wang, C.; Mao, Y. S.; Du, K. J.; Hu, B. Q.; Song, L. F.	INTERNATIONAL JOURNAL OF SIMULATION MODELLING	2016
1 and 2	An Extended Any-angle Path Planning Algorithm for Maintaining Formation of Multi-agent Jellyfish Elimination Robot System	Kim, Hanguen; Kim, Donghoon; Kim, Hyungjin; Shin, Jae-Uk; Myung, Hyun	INTERNATIONAL JOURNAL OF CONTROL AUTOMATION AND SYSTEMS	2016
1	Effects of the pole-slot combination on the PMSM of an integrated motor propulsor for an unmanned underwater vehicle considering its electric performance, noise and vibration	Hong, Do-Kwan; Joo, Dae-Suk; Lee, Ji-Young; Woo, Byung-Chul	INTERNATIONAL JOURNAL OF APPLIED ELECTROMAGNETICS AND MECHANICS	2016
4	Ground-penetrating radar profiles of the McMurdo Shear Zone, Antarctica, acquired with an unmanned rover: Interpretation of crevasses, fractures, and folds within firn and marine ice	Arcone, Steven A.; Lever, James H.; Ray, Laura E.; Walker, Benjamin S.; Hamilton, Gordon; Kaluzienski, Lynn	GEOPHYSICS	2016
4	An Efficient Calibration Approach for Arbitrary Equipped 3-D LiDAR Based on an Orthogonal Normal Vector Pair	Shang, Erke; An, Xiangjing; Shi, Meiping; Meng, Deyuan; Li, Jian; Wu, Tao	JOURNAL OF INTELLIGENT & ROBOTIC SYSTEMS	2015
2	A Review of the 2014 Gulf of Mexico Wave Glider (R) Field Program	Fitzpatrick, Patrick J.; Lau, Yee; Moorhead, Robert; Skarke, Adam; Merritt, Daniel; Kreider, Keith; Brown, Chris; Canon, Ryan; Hine, Graham; Lampoudi, Teri; Leonardi, Alan P.	MARINE TECHNOLOGY SOCIETY JOURNAL	2015
1 and 2	Capability-oriented robot architecture for maritime autonomy	Insaurralde, Carlos C.; Petillot, Yvan R.	ROBOTICS AND AUTONOMOUS SYSTEMS	2015
1	Course Control of Unmanned Surface Vehicle	Szymak, Piotr	ADVANCES IN MECHATRONIC SYSTEMS, MECHANICS AND MATERIALS	2013
4	3D Mapping for high-fidelity unmanned ground vehicle lidar simulation	Browning, Brett; Deschaud, Jean-Emmanuel; Prasser, David; Rander, Peter	INTERNATIONAL JOURNAL OF ROBOTICS RESEARCH	2012
2	Flood Disaster Mitigation: A Real-World Challenge Problem for Multi-agent Unmanned Surface Vehicles	Scerri, Paul; Kannan, Balajee; Velagapudi, Pras; Macarthur, Kate; Stone, Peter; Taylor, Matt; Dolan, John; Farinelli, Alessandro; Chapman, Archie; Dias, Bernadine; Kantor, George	ADVANCED AGENT TECHNOLOGY	2012
1	Hardware-Friendly Vision Algorithms for Embedded Obstacle Detection Applications	Wei, Zhaoyi; Lee, Dah-Jye; Nelson, Brent E.; Archibald, James K.	IEEE TRANSACTIONS ON CIRCUITS AND SYSTEMS FOR VIDEO TECHNOLOGY	2010
1	The Basic Motion Control Strategy for the Water-jet-propelled USV	Wu, Gongxing; Sun, Hanbin; Zou, Jin; Wan, Lei	2009 IEEE INTERNATIONAL CONFERENCE ON MECHATRONICS AND AUTOMATION, VOLS 1-7, CONFERENCE PROCEEDINGS	2009
4	Ablation and aero-thermodynamic studies on thermal protection systems of sharp-nosed re-entry vehicles	Candane, S. Rameche; Balaji, C.; Venkateshan, S. P.	JOURNAL OF HEAT TRANSFER-TRANSACTIONS OF THE ASME	2007
1	Intelligent autonomy for unmanned naval vehicles	Steinberg, Marc	UNMANNED SYSTEMS TECHNOLOGY VIII, PTS 1 AND 2	2006
4	Error analysis and test study of fiber optic gyroscope north-finder	Zhang, ZJ; Sun, JY; Wu, KY	Advanced Sensor Systems and Applications II Pt 1and 2	2004
4	ODIN - An underwater warfare simulation environment	Robinson, T	WSC'01: PROCEEDINGS OF THE 2001 WINTER SIMULATION CONFERENCE, VOLS 1 AND 2	2001
1	Dynamics-Level Finite-Time Fuzzy Monocular Visual Servo of an Unmanned Surface Vehicle	Wang, Ning; He, Hongkun	IEEE TRANSACTIONS ON INDUSTRIAL ELECTRONICS	2020
1	Adaptive homography-based visual servo for micro unmanned surface vehicles	Wang, Ning; He, Hongkun	INTERNATIONAL JOURNAL OF ADVANCED MANUFACTURING TECHNOLOGY	2019
4	Methodology for Processing of 3D Multibeam Sonar Big Data for Comparative Navigation	Stateczny, Andrzej; Blaszczak-Bak, Wioleta; Sobieraj-Zlobinska, Anna; Motyl, Weronika; Wisniewska, Marta	REMOTE SENSING	2019
2	Using Saildrones to Validate Satellite-Derived Sea Surface Salinity and Sea Surface Temperature along the California/Baja Coast	Vazquez-Cuervo, Jorge; Gomez-Valdes, Jose; Bouali, Marouan; Miranda, Luis E.; Van der Stocken, Tom; Tang, Wenqing; Gentemann, Chelle	REMOTE SENSING	2019
4	Optimized support vector regression algorithm-based modeling of ship dynamics	Zhu, Man; Hahn, Axel; Wen, Yuan-Qiao; Sun, Wu-Qiang	APPLIED OCEAN RESEARCH	2019
2	Methodology for Performing Territorial Sea Baseline Measurements in Selected Waterbodies of Poland	Specht, Mariusz; Specht, Cezary; Waz, Mariusz; Naus, Krzysztof; Grzadziel, Artur; Iwen, Dominik	APPLIED SCIENCES-BASEL	2019
1	Autonomous Visual Perception for Unmanned Surface Vehicle Navigation in an Unknown Environment	Zhan, Wenqiang; Xiao, Changshi; Wen, Yuanqiao; Zhou, Chunhui; Yuan, Haiwen; Xiu, Supu; Zhang, Yimeng; Zou, Xiong; Liu, Xin; Li, Qiliang	SENSORS	2019
2	Shallow-Water Habitat Mapping using Underwater Hyperspectral Imaging from an Unmanned Surface Vehicle: A Pilot Study	Mogstad, Aksel Alstad; Johnsen, Geir; Ludvigsen, Martin	REMOTE SENSING	2019
1	Adaptive course control based on trajectory linearization control for unmanned surface vehicle with unmodeled dynamics and input saturation	Mu, Dongdong; Wang, Guofeng; Fan, Yunsheng; Qiu, Bingbing; Sun, Xiaojie	NEUROCOMPUTING	2019
1	Finite-time predictor line-of-sight-based adaptive neural network path following for unmanned surface vessels with unknown dynamics and input saturation	Yu, Yalei; Guo, Chen; Yu, Haomiao	INTERNATIONAL JOURNAL OF ADVANCED ROBOTIC SYSTEMS	2018
1	A COLREGs-based obstacle avoidance approach for unmanned surface vehicles	Wang, Yanlong; Yu, Xuemin; Liang, Xu; Li, Baoan	OCEAN ENGINEERING	2018
1	Development and Experimental Tests of a ROS Multi-agent Structure for Autonomous Surface Vehicles	Conte, Giuseppe; Scaradozzi, David; Mannocchi, Daniele; Raspa, Paolo; Panebianco, Luca; Screpanti, Laura	JOURNAL OF INTELLIGENT & ROBOTIC SYSTEMS	2018
2	Quantifying cold front induced water transport of a bay with in situ observations using manned and unmanned boats	Weeks, Eddie; Robinson, Mark E.; Li Chunyan	ACTA OCEANOLOGICA SINICA	2018
4	Tracking of Ocean Surface Objects from Unmanned Aerial Vehicles with a Pan/Tilt Unit using a Thermal Camera	Helgesen, Hakon Hagen; Leira, Frederik Stendahl; Fossen, Thor I.; Johansen, Tor Arne	JOURNAL OF INTELLIGENT & ROBOTIC SYSTEMS	2018
4	Improving Tree Species Classification Using UAS Multispectral Images and Texture Measures	Gini, Rossana; Sona, Giovanna; Ronchetti, Giulia; Passoni, Daniele; Pinto, Livio	ISPRS INTERNATIONAL JOURNAL OF GEO-INFORMATION	2018
2	Monitoring Applications for Multifunctional Unmanned Surface Vehicles in Marine Coastal Environments	Kum, Byung-Cheol; Shin, Dong-Hyeok; Lee, Jung Han; Moh, TaeJun; Jang, Seok; Lee, Seung Yong; Cho, Jin Hyung	JOURNAL OF COASTAL RESEARCH	2018
1	Wide-Baseline Stereo-Based Obstacle Mapping for Unmanned Surface Vehicles	Mou, Xiaozheng; Wang, Han	SENSORS	2018
4	A Physics-Based Power Model for Skid-Steered Wheeled Mobile Robots	Dogru, Sedat; Marques, Lino	IEEE TRANSACTIONS ON ROBOTICS	2018
1	Fuzzy-Based Optimal Adaptive Line-of-Sight Path Following for Underactuated Unmanned Surface Vehicle with Uncertainties and Time-Varying Disturbances	Mu, Dongdong; Wang, Guofeng; Fan, Yunsheng; Bai, Yiming; Zhao, Yongsheng	MATHEMATICAL PROBLEMS IN ENGINEERING	2018
1	Collision Avoidance of Podded Propulsion Unmanned Surface Vehicle With COLREGs Compliance and Its Modeling and Identification	Sun, Xiaojie; Wang, Guofeng; Fan, Yunsheng; Mu, Dongdong; Qiu, Bingbing	IEEE ACCESS	2018
1	Human-autonomy teaming interface design considerations for multi-unmanned vehicle control	Calhoun, G. L.; Ruff, H. A.; Behymer, K. J.; Frost, E. M.	THEORETICAL ISSUES IN ERGONOMICS SCIENCE	2018
2	Symphony Lake Dataset	Griffith, Shane; Chahine, Georges; Pradalier, Cedric	INTERNATIONAL JOURNAL OF ROBOTICS RESEARCH	2017
1	Development of an Unmanned Surface Vehicle System for the 2014 Maritime RobotX Challenge	Park, Jeonghong; Kang, Minju; Kim, Taeyun; Kwon, Sungchur; Han, Jungwook; Wang, Jeonghyeon; Yoon, Sukmin; Yoo, Byunghyun; Hong, Seonghun; Shim, Yeonjoo; Park, Jisung; Kim, Jinwhan	JOURNAL OF FIELD ROBOTICS	2017
2	An unmanned seafloor mapping system: the concept of an AUV integrated with the newly designed USV SEA-KIT	Zwolak, Karolina; Simpson, Benjamin; Anderson, Bob; Bazhenova, Evgenia; Falconer, Robin; Kearns, Timothy; Minami, Hiroki; Roperez, Jaya; Rosedee, Azmi; Sade, Hadar; Tinmouth, Neil; Wigley, Rochelle; Zarayskaya, Yulia	OCEANS 2017 - ABERDEEN	2017
1	Ship's Trajectory Planning for Collision Avoidance at Sea Based on Modified Artificial Potential Field	Lyu, Hongguang; Yin, Yong	2017 2ND INTERNATIONAL CONFERENCE ON ROBOTICS AND AUTOMATION ENGINEERING (ICRAE)	2017
1	COLREGs-Compliant Path Planning for Autonomous Surface Vehicles: A Multiobjective Optimization Approach	Hu, Liang; Naeem, Wasif; Rajabally, Eshan; Watson, Graham; Mills, Terry; Bhuiyan, Zakirul; Salter, Ivor	IFAC PAPERSONLINE	2017
2	Derivation of Bathymetry from High-resolution Optical Satellite Imagery and USV Sounding Data	Liang, Jian; Zhang, Jie; Ma, Yi; Zhang, Chuan-Yin	MARINE GEODESY	2017
1	Vision-based target motion analysis and collision avoidance of unmanned surface vehicles	Woo, Joohyun; Kim, Nakwan	PROCEEDINGS OF THE INSTITUTION OF MECHANICAL ENGINEERS PART M-JOURNAL OF ENGINEERING FOR THE MARITIME ENVIRONMENT	2016
4	Drone-based reconstruction for 3D geospatial data processing	Renwick, Jason D.; Klein, Levente J.; Hamann, Hendrik F.	2016 IEEE 3RD WORLD FORUM ON INTERNET OF THINGS (WF-IOT)	2016
1	Co-operative Use of Marine Autonomous Systems to Enhance Navigational Accuracy of Autonomous Underwater Vehicles	Salavasidis, Georgios; Harris, Catherine A.; Rogers, Eric; Phillips, Alexander B.	TOWARDS AUTONOMOUS ROBOTIC SYSTEMS, TAROS 2016	2016
1	GPS-less Coastal Navigation using Marine Radar for USV Operation	Han, Jungwook; Park, Jeonghong; Kim, Jinwhan; Son, Nam-sun	IFAC PAPERSONLINE	2016
1	Course Control of USV Based on Fuzzy Adaptive Guide Control	Mu, Dongdong; Zhao, Yongsheng; Wang, Guofeng; Fan, Yunsheng; Bai, Yiming	PROCEEDINGS OF THE 28TH CHINESE CONTROL AND DECISION CONFERENCE (2016 CCDC)	2016
1	Autonomous Navigation of a Small Boat Using IMU/GPS/Digital Compass Integration	dos Santos, Douglas Soares; Nascimento Junior, Cairo Lucio; Cunha, Wagner Chiepa	2013 7TH ANNUAL IEEE INTERNATIONAL SYSTEMS CONFERENCE (SYSCON 2013)	2013
1	Survey of approaches for improving the intelligence of marine surface vehicles	Zheng, Huarong; Negenborn, Rudy R.; Lodewijks, Gabriel	2013 16TH INTERNATIONAL IEEE CONFERENCE ON INTELLIGENT TRANSPORTATION SYSTEMS - (ITSC)	2013
4	Experimental Validation of Mission Energy Prediction Model for Unmanned Ground Vehicles	Sadrpour, Amir; Jin, J.; Ulsoy, A. G.	2013 AMERICAN CONTROL CONFERENCE (ACC)	2013
4	Low-speed wind-tunnel test results of a BWB-UCAV model	Shim, H. J.; Park, S. O.	7TH ASIAN-PACIFIC CONFERENCE ON AEROSPACE TECHNOLOGY AND SCIENCE, APCATS 2013	2013
1	SEAKEEPING CHARACTERISTICS OF A WAVE-ADAPTIVE MODULAR UNMANNED SURFACE VEHICLE	Dhanak, Manhar R.; Ananthakrishnan, P.; Frankenfield, John; von Ellenrieder, Karl	PROCEEDINGS OF THE ASME 32ND INTERNATIONAL CONFERENCE ON OCEAN, OFFSHORE AND ARCTIC ENGINEERING - 2013 - VOL 9	2013
3	The Seabots are Coming Here: Should they be Treated as 'Vessels'?	Allen, Craig H.	JOURNAL OF NAVIGATION	2012
1	Research on Near-Field Obstacle Avoidance for Unmanned Surface Vehicle based on Heading Window	Tang Pingpeng; Zhang Rubo; Liu Deli; Zou Qijie; Shi Changting	PROCEEDINGS OF THE 2012 24TH CHINESE CONTROL AND DECISION CONFERENCE (CCDC)	2012
4	Design concepts for a hybrid swimming and walking vehicle	Cubero, Samuel N.	INTERNATIONAL SYMPOSIUM ON ROBOTICS AND INTELLIGENT SENSORS 2012 (IRIS 2012)	2012
1	USV TRAJECTORY PLANNING FOR TIME VARYING MOTION GOALS IN AN ENVIRONMENT WITH OBSTACLES	Svec, Petr; Thakur, Atul; Shah, Brual C.; Gupta, Satyandra K.	PROCEEDINGS OF THE ASME INTERNATIONAL DESIGN ENGINEERING TECHNICAL CONFERENCES AND COMPUTERS AND INFORMATION IN ENGINEERING CONFERENCE 2012, VOL 4, PTS A AND B	2012
4	Coherent and Semi-Coherent Processing of Limited-Aperture Circular Synthetic Aperture (CSAS) Data	Marston, Timothy M.; Kennedy, Jermaine L.; Marston, Philip L.	OCEANS 2011	2011
1	Control design for unmanned sea surface vehicles: Hardware-in-the-loop simulator and experimental results	Krishnamurthy, P.; Khorrami, F.; Ng, T. L.	2007 IEEE/RSJ INTERNATIONAL CONFERENCE ON INTELLIGENT ROBOTS AND SYSTEMS, VOLS 1-9	2007
1	Distributed coordinated tracking control of multiple unmanned surface vehicles under complex marine environments	Liang, Xiao; Qu, Xingru; Hou, Yuanhang; Li, Ye; Zhang, Rubo	OCEAN ENGINEERING	2020
4	Human-system concurrent task analysis for maritime autonomous surface ship operation and safety	Ramos, M. A.; Thieme, Christoph A.; Utne, Ingrid B.; Mosleh, A.	RELIABILITY ENGINEERING & SYSTEM SAFETY	2020
4	Bioaerosol field measurements: Challenges and perspectives in outdoor studies	Santl-Temkiv, Tina; Sikoparija, Branko; Maki, Teruya; Carotenuto, Federico; Amato, Pierre; Yao, Maosheng; Morris, Cindy E.; Schnell, Russ; Jaenicke, Ruprecht; Poehlker, Christopher; DeMott, Paul J.; Hill, Thomas C. J.; Huffman, J. Alex	AEROSOL SCIENCE AND TECHNOLOGY	2020
1	Integral-Based Event-Triggered Fault Detection Filter Design for Unmanned Surface Vehicles	Wang, Xudong; Fei, Zhongyang; Gao, Huijun; Yu, Jinyong	IEEE TRANSACTIONS ON INDUSTRIAL INFORMATICS	2019
1	Distributed containment maneuvering of uncertain under-actuated unmanned surface vehicles guided by multiple virtual leaders with a formation	Gu, Nan; Wang, Dan; Peng, Zhouhua; Liu, Lu	OCEAN ENGINEERING	2019
1	Modeling and Experimental Testing of an Unmanned Surface Vehicle with Rudderless Double Thrusters	Li, Chunyue; Jiang, Jiajia; Duan, Fajie; Liu, Wei; Wang, Xianquan; Bu, Lingran; Sun, Zhongbo; Yang, Guoliang	SENSORS	2019
1	Layered berthing method and experiment of unmanned surface vehicle based on multiple constraints analysis	Liao, Yulei; Jia, Zhihao; Zhang, Weibin; Jia, Qi; Li, Ye	APPLIED OCEAN RESEARCH	2019
1	A hybrid coordination controller for speed and heading control of underactuated unmanned surface vehicles system	Lv, Chengxing; Yu, Haisheng; Chi, Jieru; Xu, Tao; Zang, Hechao; Jiang, Hui lue; Zhang, Zhaowen	OCEAN ENGINEERING	2019
1	An autonomous dynamic collision avoidance control method for unmanned surface vehicle in unknown ocean environment	Fan, Yunsheng; Sun, Xiaojie; Wang, Guofeng	INTERNATIONAL JOURNAL OF ADVANCED ROBOTIC SYSTEMS	2019
4	Motion Plan of Maritime Autonomous Surface Ships by Dynamic Programming for Collision Avoidance and Speed Optimization	Geng, Xiongfei; Wang, Yongcai; Wang, Ping; Zhang, Baochen	SENSORS	2019
1	A Formation Collision Avoidance System for Unmanned Surface Vehicles With Leader-Follower Structure	Sun, Xiaojie; Wang, Guofeng; Fan, Yunsheng; Mu, Dongdong; Qiu, Bingbing	IEEE ACCESS	2019
1	Trajectory tracking control of unmanned surface vessels with input saturation and full-state constraints	Qin, Hongde; Li, Chengpeng; Sun, Yanchao; Deng, Zhongchao; Liu, Yuhan	INTERNATIONAL JOURNAL OF ADVANCED ROBOTIC SYSTEMS	2018
1	Design and Verification of Heading and Velocity Coupled Nonlinear Controller for Unmanned Surface Vehicle	Jin, Jiucai; Zhang, Jie; Liu, Deqing	SENSORS	2018
1	Unmanned wave glider heading model identification and control by artificial fish swarm algorithm	WANG Lei-feng; Liao Yu-lei; Li Ye; Zhang Wei-xin; Pan Kai-wen	JOURNAL OF CENTRAL SOUTH UNIVERSITY	2018
1	Path Following for Podded Propulsion Unmanned Surface Vehicle: Theory, Simulation and Experiment	Mu, Dongdong; Wang, Guofeng; Fan, Yunsheng; Bai, Yiming; Zhao, Yongsheng	IEEJ TRANSACTIONS ON ELECTRICAL AND ELECTRONIC ENGINEERING	2018
1	Formation Control for Water-Jet USV Based on Bio-Inspired Method	Fu, Ming-yu; Wang, Duan-song; Wang, Cheng-long	CHINA OCEAN ENGINEERING	2018
1	Tracking Control of Ball on Sphere System Using Tuned Fuzzy Sliding Mode Controller Based on Artificial Bee Colony Algorithm	Zakeri, Ehsan; Moezi, Seyed Alireza; Eghtesad, Mohammad	INTERNATIONAL JOURNAL OF FUZZY SYSTEMS	2018
1	Radar Image-Based Positioning for USV Under GPS Denial Environment	Ma, Hongjie; Smart, Edward; Ahmed, Adeel; Brown, David	IEEE TRANSACTIONS ON INTELLIGENT TRANSPORTATION SYSTEMS	2018
4	Point-Based Versus Set-Based Design Method for Robust Ship Design	Gray, Alexander W.; Rigterink, Douglas T.; McCauley, Peter	NAVAL ENGINEERS JOURNAL	2017
4	Laser range profiling for small target recognition	Steinvall, Ove; Tulldahl, Michael	OPTICAL ENGINEERING	2017
4	An aeromagnetic survey system based on an unmanned autonomous helicopter: Development, experiment, and analysis	Pei, Yanliang; Liu, Baohua; Hua, Qingfeng; Liu, Chenguang; Ji, Yuqiang	INTERNATIONAL JOURNAL OF REMOTE SENSING	2017
2	Development of an automatic sampler for extreme polar environments: first in situ application in Svalbard Islands	Zappala, Giuseppe; Bruzzone, Gabriele; Caruso, Gabriella; Azzaro, Maurizio	RENDICONTI LINCEI-SCIENZE FISICHE E NATURALI	2016
1	INS/GNSS Tightly-Coupled Integration Using Quaternion-Based AUPF for USV	Xia, Guoqing; Wang, Guoqing	SENSORS	2016
1	Hydrogen fuel cells for unmanned undersea vehicle propulsion	Swider-Lyons, Karen; Deitz, Daniel N.	POLYMER ELECTROLYTE FUEL CELLS 16 (PEFC 16)	2016
1 and 2	A novel method of unmanned surface vehicle autonomous cruise	Xie, Shaorong; Wu, Peng; Liu, Hengli; Yan, Peng; Li, Xiaomao; Luo, Jun; Li, Qingmei	INDUSTRIAL ROBOT-AN INTERNATIONAL JOURNAL	2016
4	Hierarchical control of unmanned ground vehicle formations using multi-body approach	Lantos, Bela; Max, Gyoergy	ACTA POLYTECHNICA HUNGARICA	2016
1	Vision based Obstacle Detection and Collision Risk Estimation of an Unmanned Surface Vehicle	Woo, Joohyun; Kim, Nakwan	2016 13TH INTERNATIONAL CONFERENCE ON UBIQUITOUS ROBOTS AND AMBIENT INTELLIGENCE (URAI)	2016
1	Adaptive RBF Neural Network Control for Unmanned Surface Vessel Course Tracking	Li, Canhe; Zhao, Yongsheng; Wang, Guofeng; Fan, Yunsheng; Bai, Yiming	2016 SIXTH INTERNATIONAL CONFERENCE ON INFORMATION SCIENCE AND TECHNOLOGY (ICIST)	2016
1	Straight path following of unmanned surface vehicle under flow disturbance	Zhu, Jing; Wang, Jianhua; Zheng, Tiqiang; Wu, Gongxing	OCEANS 2016 - SHANGHAI	2016
1	Speeding Up A* Search on Visibility Graphs Defined over Quadtrees to Enable Long Distance Path Planning for Unmanned Surface Vehicles	Shah, Brual C.; Gupta, Satyandra K.	TWENTY-SIXTH INTERNATIONAL CONFERENCE ON AUTOMATED PLANNING AND SCHEDULING (ICAPS 2016)	2016
1	Guidance, Navigation and Control of Unmanned Surface Vehicles	Kurowski, Martin; Haghani, Adel; Koschorrek, Philipp; Jeinsch, Torsten	AT-AUTOMATISIERUNGSTECHNIK	2015
4	Fixed-Wing Unmanned Aircraft In-Flight Pitch and Yaw Control Moment Sensing	Yeo, Derrick; Atkins, Ella M.; Bernal, Luis P.; Shyy, Wei	JOURNAL OF AIRCRAFT	2015
4	Adaptive Covariance Estimation Method for LiDAR-Aided Multi-Sensor Integrated Navigation Systems	Liu, Shifei; Atia, Mohamed Maher; Gao, Yanbin; Noureldin, Aboelmagd	MICROMACHINES	2015
2	The Use of Saildrones to Examine Spring Conditions in the Bering Sea Instrument Comparisons, Sea Ice Meltwater and Yukon River Plume Studies	Cokelet, Edward D.; Meinig, Christian; Lawrence-Slavas, Noah; Stabeno, Phyllis J.; Jenkins, Richard; Mordy, Calvin W.; Tabisola, Heather M.; Cross, Jessica N.	OCEANS 2015 - MTS/IEEE WASHINGTON	2015
2	CatOne, Multitask Unmanned Surface Vessel for Hydro-Geological and Environment Surveys	Duranti, Pierluigi	ENGINEERING GEOLOGY FOR SOCIETY AND TERRITORY, VOL 3: RIVER BASINS, RESERVOIR SEDIMENTATION AND WATER RESOURCES	2015
1	Autonomous detection and tracking of a surface ship using onboard monocular vision	Cho, Yonghoon; Park, Jeonghong; Kang, Minju; Kim, Jinwhan	2015 12TH INTERNATIONAL CONFERENCE ON UBIQUITOUS ROBOTS AND AMBIENT INTELLIGENCE (URAI)	2015
4	Real-time Road Detection and Description for Robot Navigation in an Unstructured Campus Environment	Xu, Wenhao; Zhuang, Yan; Hu, Huosheng; Zhao, Yiwen	2014 11TH WORLD CONGRESS ON INTELLIGENT CONTROL AND AUTOMATION (WCICA)	2014
4	Development and Experimental Validation of a Model for the Membrane Restoring Torques in Undulatory Fin Mechanisms	Sfakiotakis, Michael; Fasoulas, John	2014 22ND MEDITERRANEAN CONFERENCE ON CONTROL AND AUTOMATION (MED)	2014
2	Unmanned Surface Vehicles for Automatic Bathymetry Mapping and Shores' Maintenance	Bibuli, M.; Bruzzone, G.; Caccia, M.; Fumagalli, E.; Saggini, E.; Zereik, E.; Buttaro, E.; Caporale, C.; Ivaldi, R.	OCEANS 2014 - TAIPEI	2014
1	A Topological Map Based Approach to Long Range Operation of An Unmanned Surface Vehicle	Gadre, Aditya S.; Du, Shu; Stilwell, Daniel J.	2012 AMERICAN CONTROL CONFERENCE (ACC)	2012
4	Stage: Controlling Space Robots from a CAVE on Earth	Abramyan, Lucy; Powell, Mark; Norris, Jeffrey	2012 IEEE AEROSPACE CONFERENCE	2012
2	Integrating Autonomous Underwater Vessels, Surface Vessels and Aircraft as Persistent Surveillance Components of Ocean Observing Studies	McGillivary, P.; Rajan, K.; Borges de Sousa, J.; Leroy, F.; Martins, R.	2012 IEEE/OES AUTONOMOUS UNDERWATER VEHICLES (AUV)	2012
4	Localization of an Unmanned Ground Vehicle based on Hybrid 3D Registration of 360 degree Range Data and DSM	Park, Soon-Yong; Choi, Sung-In; Moon, Jaekyoung; Kim, Jun; Park, Yong Woon	INTERNATIONAL JOURNAL OF CONTROL AUTOMATION AND SYSTEMS	2011
1	Design and Implement of the Control System for Unmanned Surface Vehicle based on the VxWorks	Zhao, Jiang; Yan, Weisheng; Gao, Jian; Shi, Shuwei	2010 2ND INTERNATIONAL ASIA CONFERENCE ON INFORMATICS IN CONTROL, AUTOMATION AND ROBOTICS (CAR 2010), VOL 3	2010
4	Increasing persistence of UAVs and MAVs through thermal soaring	Cowling, I. D.; Willcox, S.; Patel, Y.; Smith, P.; Roberts, M.	AERONAUTICAL JOURNAL	2009
1	Computations of insect and fish locomotion with applications to unconventional unmanned vehicles	Ramamurti, Ravi; Sandberg, William	AIAA JOURNAL	2008
4	Aerodynamic control using windward-surface plasma actuators on a separation ramp	Lopera, Javier; Ng, T. Terry; Patel, Mehul P.; Vasudevan, Srikanth; Santavicca, Ed; Corke, Thomas C.	JOURNAL OF AIRCRAFT	2007
4	A novel approach for self-localization based on computer vision and artificial marker deposition	Chhaniyara, Savan; Althoefer, Kaspar; Zweiri, Yahya H.; Seneviratne, Lakmal D.	2007 IEEE INTERNATIONAL CONFERENCE ON NETWORKING, SENSING, AND CONTROL, VOLS 1 AND 2	2007
1	Study on Dynamic Behavior of Unmanned Surface Vehicle-Linked Unmanned Underwater Vehicle System for Underwater Exploration	Mai The Vu; Mien Van; Duc Hong Phuc Bui; Quang Thang Do; Tuan-Tu Huynh; Sang-Do Lee; Hyeung-Sik Choi	SENSORS	2020
2	Long-term measurements of fish backscatter from Saildrone unmanned surface vehicles and comparison with observations from a noise-reduced research vessel	De Robertis, Alex; Lawrence-Slavas, Noah; Jenkins, Richard; Wangen, Ivar; Mordy, Calvin W.; Meinig, Christian; Levine, Mike; Peacock, Dave; Tabisola, Heather	ICES JOURNAL OF MARINE SCIENCE	2019
1	Application of Improved Particle Swarm Optimization for Navigation of Unmanned Surface Vehicles	Xin, Junfeng; Li, Shixin; Sheng, Jinlu; Zhang, Yongbo; Cui, Ying	SENSORS	2019
1	(MC)-C-3: Multimodel-and-Multicue-Based Tracking by Detection of Surrounding Vessels in Maritime Environment for USV	Qiao, Dalei; Liu, Guangzhong; Zhang, Jun; Zhang, Qiangyong; Wu, Gongxing; Dong, Feng	ELECTRONICS	2019
1	Track-keeping observer-based robust adaptive control of an unmanned surface vessel by applying a 4-DOF maneuvering model	Faramin, M.; Goudarzi, R. H.; Maleki, A.	OCEAN ENGINEERING	2019
4	Passive/active microwave soil moisture change disaggregation using SMAPVEX12 data	Fang, Bin; Lakshmi, Venkat; Jackson, Thomas J.; Bindlish, Rajat; Colliander, Andreas	JOURNAL OF HYDROLOGY	2019
1	Study on intelligent collision avoidance and recovery path planning system for the waterjet-propelled unmanned surface vehicle	Shi, Binghua; Su, Yixin; Wang, Chen; Wan, Lili; Luo, Yi	OCEAN ENGINEERING	2019
1	Trajectory-cell based method for the unmanned surface vehicle motion planning	Du, Zhe; Wen, Yuanqiao; Xiao, Changshi; Huang, Liang; Zhou, Chunhui; Zhang, Fan	APPLIED OCEAN RESEARCH	2019
2	A Detailed Reconstruction of the Roman Landscape and the Submerged Archaeological Structure at Castel dell'Ovo islet (Naples, Southern Italy)	Pappone, Gerardo; Aucelli, Pietro P. C.; Mattei, Gaia; Peluso, Francesco; Stefanile, Michele; Carola, Armando	GEOSCIENCES	2019
1	Second Path Planning for Unmanned Surface Vehicle Considering the Constraint of Motion Performance	Fan, Jiajia; Li, Ye; Liao, Yulei; Jiang, Wen; Wang, Leifeng; Jia, Qi; Wu, Haowei	JOURNAL OF MARINE SCIENCE AND ENGINEERING	2019
4	A Multi-Feature and Multi-Level Matching Algorithm Using Aerial Image and AIS for Vessel Identification	Xiu, Supu; Wen, Yuanqiao; Yuan, Haiwen; Xiao, Changshi; Zhan, Wenqiang; Zou, Xiong; Zhou, Chunhui; Shah, Sayed Chhattan	SENSORS	2019
1	A Robust Localization Method for Unmanned Surface Vehicle (USV) Navigation Using Fuzzy Adaptive Kalman Filtering	Liu, Wenwen; Liu, Yuanchang; Bucknall, Richard	IEEE ACCESS	2019
1	Monitoring trajectory optimization for unmanned surface vessel in sailboat race	Wang, Yuying; Yao, Peng; Dou, Yanmei	OPTIK	2019
1	A two-level dynamic obstacle avoidance algorithm for unmanned surface vehicles	Song, A. Lifei; Su, B. Yiran; Dong, C. Zaopeng; Shen, D. Wei; Xiang, E. Zuquan; Mao, F. Puxiu	OCEAN ENGINEERING	2018
2	Mapping cetacean sounds using a passive acoustic monitoring system towed by an autonomous Wave Glider in the Southwestern Atlantic Ocean	Bittencourt, Lis; Soares-Filho, William; Seabra de Lima, Isabela Maria; Pai, Sudhir; Lailson-Brito, Jose, Jr.; Barreira, Leonardo Martins; Azevedo, Alexandre Freitas; Guerra, Luiz Alexandre A.	DEEP-SEA RESEARCH PART I-OCEANOGRAPHIC RESEARCH PAPERS	2018
1	Neural adaptive sliding mode controller for unmanned surface vehicle steering system	Wan, Lili; Su, Yixin; Zhang, Huajun; Tang, Yongchuan; Shi, Binghua	ADVANCES IN MECHANICAL ENGINEERING	2018
1	HEADING CONTROL SYSTEM DESIGN FOR A MICRO-USV BASED ON AN ADAPTIVE EXPERT S-PID ALGORITHM	Miao, Runlong; Dong, Zaopeng; Wan, Lei; Zeng, Jiangfeng	POLISH MARITIME RESEARCH	2018
1	Decomposition of Collaborative Surveillance Tasks for Execution in Marine Environments by a Team of Unmanned Surface Vehicles	Shriyam, Shaurya; Shah, Brual C.; Gupta, Satyandra K.	JOURNAL OF MECHANISMS AND ROBOTICS-TRANSACTIONS OF THE ASME	2018
4	Stability and Control Investigations of Generic 53 Degree Swept Wing with Control Surfaces	Schuette, Andreas; Huber, Kerstin C.; Frink, Neal T.; Boelens, Okko J.	JOURNAL OF AIRCRAFT	2018
2	Remote collection of microorganisms at two depths in a freshwater lake using an unmanned surface vehicle (USV)	Powers, Craig; Hanlon, Regina; Schmale, David G., III	PEERJ	2018
4	PROSPECTS FOR TECHNOLOGICAL DEVELOPMENT AND IMPLEMENTATION OF UNMANNED SHIPS	Titov, Alexey V.; Barakat, Lama	MARINE INTELLECTUAL TECHNOLOGIES	2018
2	Development of Unmanned Surface Vehicle for water quality monitoring and measurement	Yang, T. H.; Hsiung, S. H.; Kuo, C. H.; Tsai, Y. D.; Peng, K. C.; Peng, K. C.; Hsieh, Y. C.; Shen, Z. J.; Feng, J.; Kuo, C.	PROCEEDINGS OF 4TH IEEE INTERNATIONAL CONFERENCE ON APPLIED SYSTEM INNOVATION 2018 ( IEEE ICASI 2018 )	2018
1	Feasibility Study of a Constrained Dijkstra Approach for Optimal Path Planning of an Unmanned Surface Vehicle in a Dynamic Maritime Environment	Singh, Yogang; Sharma, Sanjay; Sutton, Robert; Hatton, Daniel; Khan, Asiya	2018 IEEE INTERNATIONAL CONFERENCE ON AUTONOMOUS ROBOT SYSTEMS AND COMPETITIONS (ICARSC)	2018
4	Seabed Characterization From Ambient Noise Using Short Arrays and Autonomous Vehicles	Nielsen, Peter Louring; Muzi, Lanfranco; Siderius, Martin	IEEE JOURNAL OF OCEANIC ENGINEERING	2017
1	DESIGN OF ROBUST ADAPTIVE COURSE CONTROLLER FOR UNMANNED SURFACE VEHICLE WITH INPUT SATURATION	Mu, Dongdong; Wang, Guofeng; Fan, Yunsheng; Zhao, Yongsheng	INTERNATIONAL JOURNAL OF INNOVATIVE COMPUTING INFORMATION AND CONTROL	2017
1	Design and validation of an unmanned surface vehicle simulation model	Heins, Peter H.; Jones, Bryn Ll.; Taunton, Dominic J.	APPLIED MATHEMATICAL MODELLING	2017
1	Improving vision-based obstacle detection on USV using inertial sensor	Bovcon, Borja; Mandeljc, Rok; Pers, Janez; Kristan, Matej	PROCEEDINGS OF THE 10TH INTERNATIONAL SYMPOSIUM ON IMAGE AND SIGNAL PROCESSING AND ANALYSIS	2017
4	Design of control system for an unmaned semi-submersible vehicle	Wang, Bo; Fei, Qing; Huang, Xiao-Song; Geng, Qing-Bo	2017 13TH IEEE INTERNATIONAL CONFERENCE ON CONTROL & AUTOMATION (ICCA)	2017
4	Comparison of Carbon Footprint of Trenchless and Open-Cut Methods for Underground Freight Transportation	Tavakoli, Razieh; Najafi, Mohammad; Tabesh, Amir; Ashoori, Taha	PIPELINES 2017: CONSTRUCTION AND REHABILITATION	2017
4	Comparison of Carbon Footprint of Trenchless and Open-Cut Methods for Underground Freight Transportation	Zhang, Xiangli; Wang, Hesheng; Chen, Weidong	2017 SEVENTH INTERNATIONAL CONFERENCE ON INFORMATION SCIENCE AND TECHNOLOGY (ICIST2017)	2017
1	Effective Waterline Detection of Unmanned Surface Vehicles Based on Optical Images	Wei, Yangjie; Zhang, Yuwei	SENSORS	2016
4	Development of a bio-inspired transformable robotic fin	Yang, Yikun; Xia, Yu; Qin, Fenghua; Xu, Min; Li, Weihua; Zhang, Shiwu	BIOINSPIRATION & BIOMIMETICS	2016
1	NMPC-based Trajectory Tracking and Collision Avoidance of Unmanned Surface Vessels with Rule-based Colregs Confinement	Abdelaal, Mohamed; Hahn, Axel	2016 IEEE CONFERENCE ON SYSTEMS, PROCESS AND CONTROL (ICSPC)	2016
1	A Survey on Tactical Control Algorithms for Path Tracking Unmanned Surface Vehicles	Kumru, Murat; Leblebicioglu, Kemal; Erunsal, Izzet Kagan; Ahiska, Kenan	2016 14TH INTERNATIONAL CONFERENCE ON CONTROL, AUTOMATION, ROBOTICS AND VISION (ICARCV)	2016
1 and 2	Maritime Unmanned Vehicle Cruise Path Planning for Maritime Information Collection	Zhu, Man; Hahn, Axel; Wen, Yuan Q.; Zhang, Fan	IFAC PAPERSONLINE	2016
1	Verifying Collision Avoidance Behaviours for Unmanned Surface Vehicles using Probabilistic Model Checking	Lu, Yu; Niu, Hanlin; Savvaris, Al; Tsourdos, Antonios	IFAC PAPERSONLINE	2016
4	CADDY Project, Year 2: The First Validation Trials	Miskovic, Nikola; Pascoal, Antonio; Bibuli, Marco; Caccia, Massimo; Neasham, Jeffrey A.; Birk, Andreas; Egi, Murat; Grammer, Karl; Marroni, Alessandro; Vasilijevic, Antonio; Vukic, Zoran	IFAC PAPERSONLINE	2016
1	Development of a Multi-purpose Unmanned Surface Vehicle and Simulation Comparison of Path Tracking Methods	Kim, Taejin; Choi, Jinwoo; Lee, Yeongjun; Choi, Hyun-Taek	2016 13TH INTERNATIONAL CONFERENCE ON UBIQUITOUS ROBOTS AND AMBIENT INTELLIGENCE (URAI)	2016
1	Design of Sail-Assisted Unmanned Surface Vehicle Intelligent Control System	Ma, Yong; Zhao, Yujiao; Diao, Jiantao; Gan, Langxiong; Bi, Huaxiong; Zhao, Jingming	MATHEMATICAL PROBLEMS IN ENGINEERING	2016
4	Three-layer intelligence of planetary exploration wheeled mobile robots: Robint, virtint, and humint	Ding Liang; Gao HaiBo; Deng ZongQuan; Li YuanKai; Liu GuangJun; Yang HuaiGuang; Yu HaiTao	SCIENCE CHINA-TECHNOLOGICAL SCIENCES	2015
4	Postswirl Maneuvering Propulsor	Huyer, Stephen A.	JOURNAL OF FLUIDS ENGINEERING-TRANSACTIONS OF THE ASME	2015
4	DSM Generation and Accuracy Analysis from UAV Images on River-side Facilities	Rhee, Sooahm; Kim, Taejung; Kim, Jaein; Kim, Min Chul; Chang, Hwi Jeong	KOREAN JOURNAL OF REMOTE SENSING	2015
1	Low Cost Optronic Obstacle Detection Sensor for Unmanned Surface Vehicles	Sorbara, Andrea; Zereik, Enrica; Bibuli, Marco; Bruzzone, Gabriele; Caccia, Massimo	2015 IEEE SENSORS APPLICATIONS SYMPOSIUM (SAS)	2015
1	The Control and Simulation for the ADRC of USV	Chen, Feihu; Xiong, Hejin; Fu, Jian	2015 Chinese Automation Congress (CAC)	2015
1	COLREGS-Compliant Target Following for an Unmanned Surface Vehicle in Dynamic Environments	Agrawal, Pranay; Dolan, John M.	2015 IEEE/RSJ INTERNATIONAL CONFERENCE ON INTELLIGENT ROBOTS AND SYSTEMS (IROS)	2015
1	Autonomous Robotic Refueling of an Unmanned Surface Vehicle in Varying Sea States	Scott, Gregory P.; Henshaw, C. Glen; Walker, Ian D.; Willimon, Bryan	2015 IEEE/RSJ INTERNATIONAL CONFERENCE ON INTELLIGENT ROBOTS AND SYSTEMS (IROS)	2015
2	AGaPaS: A new approach for search-and-rescue-operations at sea	Kurowski, Martin; Lampe, Bernhard P.	PROCEEDINGS OF THE INSTITUTION OF MECHANICAL ENGINEERS PART M-JOURNAL OF ENGINEERING FOR THE MARITIME ENVIRONMENT	2014
4	Inverse simulation and analysis of underwater vehicle dynamics using feedback principles	Murray-Smith, David J.	MATHEMATICAL AND COMPUTER MODELLING OF DYNAMICAL SYSTEMS	2014
1	Trajectory Planning with Adaptive Control Primitives for Autonomous Surface Vehicles Operating in Congested Civilian Traffic	Shah, Brual C.; Svec, Petr; Bertaska, Ivan R.; Klinger, Wilhelm; Sinisterra, Armando J.; von Ellenrieder, Karl; Dhanak, Manhar; Gupta, Satyandra K.	2014 IEEE/RSJ INTERNATIONAL CONFERENCE ON INTELLIGENT ROBOTS AND SYSTEMS (IROS 2014)	2014
1	A Sonar Image Mosaicing Algorithm based on Improved SIFT for USV	Li, Hengyu; Dong, Yi; He, Xudong; Xie, Shaorong; Luo, Jun	2014 IEEE INTERNATIONAL CONFERENCE ON MECHATRONICS AND AUTOMATION (IEEE ICMA 2014)	2014
1	Adaptive mission planning for cooperative autonomous maritime vehicles	Ferri, Gabriele; Djapic, Vladimir	2013 IEEE INTERNATIONAL CONFERENCE ON ROBOTICS AND AUTOMATION (ICRA)	2013
4	Under Ice Positioning and Communications for Unmanned Vehicles	Jones, Clayton; Morozov, Andrey; Manley, Justin E.	2013 MTS/IEEE OCEANS - BERGEN	2013
1	Free running tests of a waterjet propelled unmanned surface vehicle	von Ellenrieder, K. D.	JOURNAL OF MARINE ENGINEERING AND TECHNOLOGY	2013
1	Navigation of an Unmanned Surface Vessel under Bridges	Han, Jungwook; Kim, Jinwhan	2013 10TH INTERNATIONAL CONFERENCE ON UBIQUITOUS ROBOTS AND AMBIENT INTELLIGENCE (URAI)	2013
1	Towards Good Experimental Methodologies for Unmanned Marine Vehicles	Caccia, Massimo; Saggini, Eleonora; Bibuli, Marco; Bruzzone, Gabriele; Zereik, Enrica; Riccomagno, Eva	COMPUTER AIDED SYSTEMS THEORY, PT II	2013
1	A Nonlinear Path Following Controller for an Underactuated Unmanned Surface Vessel	Daly, John M.; Tribou, Michael J.; Waslander, Steven L.	2012 IEEE/RSJ INTERNATIONAL CONFERENCE ON INTELLIGENT ROBOTS AND SYSTEMS (IROS)	2012
4	A Comprehensive Pressure-Sinkage Model for Small-Wheeled Unmanned Ground Vehicles on Dilative, Deformable Terrain	Meirion-Griffith, Gareth; Spenko, Matthew	2012 IEEE INTERNATIONAL CONFERENCE ON ROBOTICS AND AUTOMATION (ICRA)	2012
4	Adaptive Bearing Sampling for a Constant-Time Surfacing A* Path Planning Algorithm for Gliders	Fernandez-Perdomo, Enrique; Cabrera-Gamez, Jorge; Hernandez-Sosa, Daniel; Isern-Gonzalez, Josep; Dominguez-Brito, Antonio C.; Prieto-Maranon, Victor; Ramos, Antonio G.	2011 IEEE INTERNATIONAL CONFERENCE ON ROBOTICS AND AUTOMATION (ICRA)	2011
2	The Unmanned Port Security Vessel: An Autonomous Platform for Monitoring Ports and Harbors	Howard, Vincent; Mefford, Jonathon; Arnold, Lee; Bingham, Brian; Camilli, Richard	OCEANS 2011	2011
4	Piezo-composite actuated control surface system for flying vehicle	Park, Ki Hoon; Yoon, Bum Soo; Nguyen, Ngoc Trung; Goo, Nam Seo; Kang, Tae Sam; Yoon, Kwang Joon	AIRCRAFT ENGINEERING AND AEROSPACE TECHNOLOGY	2010
1	An Automatic Collision Avoidance Strategy for Unmanned Surface Vehicles	Naeem, Wasif; Irwin, George W.	LIFE SYSTEM MODELING AND INTELLIGENT COMPUTING, PT II	2010
1	Control-Oriented Planar Motion Modeling of Unmanned Surface Vehicles	Sonnenburg, C.; Gadre, A.; Horner, D.; Kragelund, S.; Marcus, A.; Stilwell, D. J.; Woolsey, C. A.	OCEANS 2010	2010
4	Hardware-in-The-Loop Simulators for multi-vehicles scenarios: survey on existing solutions and proposal of a new architecture	Parodi, Olivier; Lapierre, Lionel; Jouvencel, Bruno	2009 IEEE-RSJ INTERNATIONAL CONFERENCE ON INTELLIGENT ROBOTS AND SYSTEMS	2009
1	Design of the Intelligence Motion Control System for the High-speed USV	Wu Gong-xing; Zou Jin; Wan Lei; Qin Zai-bai	ICICTA: 2009 SECOND INTERNATIONAL CONFERENCE ON INTELLIGENT COMPUTATION TECHNOLOGY AND AUTOMATION, VOL III, PROCEEDINGS	2009
4	Formation Control of Marine Veihicles via Real-Time Networked Decentralized MPC	Vaccarini, Massimo; Longhi, Sauro	MED: 2009 17TH MEDITERRANEAN CONFERENCE ON CONTROL & AUTOMATION, VOLS 1-3	2009
4	Transition Measurement of Natural Laminar Flow Wing on Supersonic Experimental Airplane NEXST-1	Tokugawa, Naoko; Kwak, Dong-Youn; Yoshida, Kenji; Ueda, Yoshine	JOURNAL OF AIRCRAFT	2008
4	Dual-RiverSonde measurements of two-dimensional river flow patterns	Teague, Calvin C.; Barrick, Donald E.; Lilleboe, Peter M.; Cheng, Ralph T.; Stumpner, Paul; Burau, Jon R.	PROCEEDINGS OF THE IEEE/OES/CMTC NINTH WORKING CONFERENCE ON CURRENT MEASUREMENT TECHNOLOGY	2008
4	Recovering Unmanned Undersea Vehicles with a Homing and Docking Sonar	de Goede, Grant M.; Norris, Donald	OCEANS 2005, VOLS 1-3	2005
4	Obstacle detection in foliage with ladar and radar	Matthies, L; Bergh, C; Castano, A; Macedo, J; Manduchi, R	Robotics Research	2005
4	Device for electro-magnetohydrodynamic (EMHD) energy harvesting	Snarski, SR; Kasper, RG; Bruno, AB	UNATTENDED/UNMANNED GROUND, OCEAN, AND AIR SENSOR TECHNOLOGIES AND APPLICATIONS VI	2004
4	Sensor fusion based missile guidance	Pathirana, PN; Savkin, AV	FUSION 2003: PROCEEDINGS OF THE SIXTH INTERNATIONAL CONFERENCE OF INFORMATION FUSION, VOLS 1 AND 2	2003
2	Modularized unmanned vehicle packages for the littoral combat ship mine countermeasures missions	Schnoor, RT	OCEANS 2003 MTS/IEEE: CELEBRATING THE PAST...TEAMING TOWARD THE FUTURE	2003
4	Hardware-in-the-loop simulation for undersea vehicle applications	Kelf, MA	TECHNOLOGIES FOR SYNTHETIC ENVIRONMENTS: HARDWARE-IN-THE-LOOP TESTING VI	2001
1	Redefined Output Model-Free Adaptive Control Method and Unmanned Surface Vehicle Heading Control	Liao, Yulei; Jiang, Quanquan; Du, Tingpeng; Jiang, Wen	IEEE JOURNAL OF OCEANIC ENGINEERING	2020
1	A framework to identify factors influencing navigational risk for Maritime Autonomous Surface Ships	Fan, Cunlong; Wrobel, Krzysztof; Montewka, Jakub; Gil, Mateusz; Wan, Chengpeng; Zhang, Di	OCEAN ENGINEERING	2020
1	Greedy Mechanism Based Particle Swarm Optimization for Path Planning Problem of an Unmanned Surface Vehicle	Xin, Junfeng; Zhong, Jiabao; Li, Shixin; Sheng, Jinlu; Cui, Ying	SENSORS	2019
4	Adaptive neural dynamic surface control of MIMO uncertain nonlinear systems with time-varying full state constraints and disturbances	Wei, Yan; Zhou, Ping-fang; Wang, Yue-ying; Duan, Deng-ping; Zhou, Weixiang	NEUROCOMPUTING	2019
1	Optimal search path planning for unmanned surface vehicle based on an improved genetic algorithm	Guo, Hui; Mao, Zhaoyong; Ding, Wenjun; Liu, Peiliang	COMPUTERS & ELECTRICAL ENGINEERING	2019
4	Ground Control Point-Free Unmanned Aerial Vehicle-Based Photogrammetry for Volume Estimation of Stockpiles Carried on Barges	He, Haiqing; Chen, Ting; Zeng, Huaien; Huang, Shengxiang	SENSORS	2019
4	Evaluation of atomic oxygen effects on nano-coated carbon-carbon structures for re-entry applications	Delfini, A.; Santoni, F.; Bisegna, F.; Piergentili, F.; Pastore, R.; Vricella, A.; Albano, M.; Familiari, G.; Battaglione, E.; Matassa, R.; Marchetti, M.	ACTA ASTRONAUTICA	2019
4	A Precise and Robust Segmentation-Based Lidar Localization System for Automated Urban Driving	Liu, Hang; Ye, Qin; Wang, Hairui; Chen, Liang; Yang, Jian	REMOTE SENSING	2019
4	Dynamics modeling of an unmanned wave glider with flexible umbilical	Wang, Leifeng; Li, Ye; Liao, Yulei; Pan, Kaiwen; Zhang, Weixin	OCEAN ENGINEERING	2019
1	Robust Adaptive Path Following Control of an Unmanned Surface Vessel Subject to Input Saturation and Uncertainties	Fan, Yunsheng; Huang, Hongyun; Tan, Yuanyuan	APPLIED SCIENCES-BASEL	2019
1	Coastal SLAM With Marine Radar for USV Operation in GPS-Restricted Situations	Han, Jungwook; Cho, Yonghoon; Kim, Jinwhan	IEEE JOURNAL OF OCEANIC ENGINEERING	2019
4	A multi-sensor robotic platform for ground mapping and estimation beyond the visible spectrum	Milella, Annalisa; Reina, Giulio; Nielsen, Michael	PRECISION AGRICULTURE	2019
1	Global fast terminal sliding mode control based on radial basis function neural network for course keeping of unmanned surface vehicle	Wan, Lili; Su, Yixin; Zhang, Huajun; Tang, Yongchuan; Shi, Binghua	INTERNATIONAL JOURNAL OF ADVANCED ROBOTIC SYSTEMS	2019
1	Improved decentralized finite-time formation control of underactuated USVs via a novel disturbance observer	Huang, Chenfeng; Zhang, Xianku; Zhang, Guoqing	OCEAN ENGINEERING	2019
4	Plasma Actuator Application on a Full-Scale Aircraft Tail	Keisar, David; Hasin, David; Greenblatt, David	AIAA JOURNAL	2019
1	Fault Diagnosis Observer and Fault-Tolerant Control Design for Unmanned Surface Vehicles in Network Environments	Zhou, Zitian; Zhong, Maiying; Wang, Youqing	IEEE ACCESS	2019
4	Uncertainty-based design optimization of NLF airfoil for high altitude long endurance unmanned air vehicles	Zhao, Huan; Gao, Zhenghong	ENGINEERING COMPUTATIONS	2019
1	High reliability management and control operator risks in autonomous marine systems and operations	Utne, Ingrid B.; Schjolberg, Ingrid; Roe, Emery	OCEAN ENGINEERING	2019
1	Obstacles modeling method in cluttered environments using satellite images and its application to path planning for USV	Shi, Binghua; Su, Yixin; Zhang, Huajun; Liu, Jiawen; Wan, Lili	INTERNATIONAL JOURNAL OF NAVAL ARCHITECTURE AND OCEAN ENGINEERING	2019
1	ERROR MITIGATION ALGORITHM BASED ON BIDIRECTIONAL FITTING METHOD FOR COLLISION AVOIDANCE OF UNMANNED SURFACE VEHICLE	Song, Lifei; Chen, Zhuo; Mao, Yunsheng; Dong, Zaopeng; Xiang, Zuquan	POLISH MARITIME RESEARCH	2018
1	Collision Avoidance Using Finite Control Set Model Predictive Control for Unmanned Surface Vehicle	Sun, Xiaojie; Wang, Guofeng; Fan, Yunsheng; Mu, Dongdong; Qiu, Bingbing	APPLIED SCIENCES-BASEL	2018
1	Autopilot Design for Unmanned Surface Vehicle based on CNN and ACO	Zhao, D.; Yang, T.; Ou, W.; Zhou, H.	INTERNATIONAL JOURNAL OF COMPUTERS COMMUNICATIONS & CONTROL	2018
2	Status of Ocean Observation using Wave Glider	Son, Young Baek; Moh, Taejun; Jung, Seom-Kyu; Hwnag, Jae Dong; Oh, Hyunju; Kim, Sang-Hyun; Ryu, Joo-Hyung; Cho, Jin Hyung	KOREAN JOURNAL OF REMOTE SENSING	2018
4	Distributed Water Pollution Source Localization with Mobile UV-Visible Spectrometer Probes in Wireless Sensor Networks	Ma, Junjie; Meng, Fansheng; Zhou, Yuexi; Wang, Yeyao; Shi, Ping	SENSORS	2018
4	Research on a Real-Time Monitoring Platform for Compaction of High Embankment in Airport Engineering	Yao, Yang-Ping; Ruan, Yang-Zhi; Chen, Jun; Geng, Yi; Zhang, Xing; Liu, Bing-Yang; Zong, Xiao-Peng; Yu, Gui-Zhen	JOURNAL OF CONSTRUCTION ENGINEERING AND MANAGEMENT	2018
4	Neuro-adaptive dynamic integral sliding mode control design with output differentiation observer for uncertain higher order MIMO nonlinear systems	Khan, Qudrat; Akmeliawati, Rini	NEUROCOMPUTING	2017
1	Set-Based Line-of-Sight (LOS) Path Following with Collision Avoidance for Underactuated Unmanned Surface Vessels under the Influence of Ocean Currents	Moe, Signe; Pettersen, Kristin Y.	2017 IEEE CONFERENCE ON CONTROL TECHNOLOGY AND APPLICATIONS (CCTA 2017)	2017
4	Robotic Experiments to Evaluate Ocean Plume Characteristics and Structure	Fahad, Muhammad; Guo, Yi; Bingham, Brian; Krasnosky, Kristopher; Fitzpatrick, Laura; Sanabria, Fernando A.	2017 IEEE/RSJ INTERNATIONAL CONFERENCE ON INTELLIGENT ROBOTS AND SYSTEMS (IROS)	2017
1	A Design of Control System for Fixed Double Propellant Unmanned Surface Vehicle Based on Moos-IvP	Dong, Lingyan; Jia, Songli; Xu, Hongli; Yi, Wenkang	2017 2ND ASIA-PACIFIC CONFERENCE ON INTELLIGENT ROBOT SYSTEMS (ACIRS)	2017
1	A course control system of unmanned surface vehicle (USV) using back-propagation neural network (BPNN) and artificial bee colony (ABC) algorithm	Fang, Yang; Pang, Muye; Wang, Biao	8TH INTERNATIONAL CONFERENCE ON ADVANCES IN INFORMATION TECHNOLOGY	2017
1	A situation awareness approach for USV based on Artificial Potential Fields	Chao, Wu; Qing, Wu; Feng, Ma; Shuwu, Wang	2017 4TH INTERNATIONAL CONFERENCE ON TRANSPORTATION INFORMATION AND SAFETY (ICTIS)	2017
1	Formation Control of Unmanned Surface Vehicles with Sensing Constraints Using Exponential Remapping Method	Wang, Jian; Liu, Jing-Yang; Yi, Hong	MATHEMATICAL PROBLEMS IN ENGINEERING	2017
1	CONTROLLING UNMANNED SURFACE VEHICLE ROCKET USING GPS TRACKING METHOD	Sutresman, Onny; Syam, Rafiuddin; Asmal, Sapta	INTERNATIONAL JOURNAL OF TECHNOLOGY	2017
1	Flexible Unmanned Surface Vehicles enabling Future Internet Experimentally-driven Research	Ferreira, Bruno; Coelho, Andre; Lopes, Mario; Matos, Anibal; Goncalves, Carlos; Kandasamy, Saravanan; Campos, Rui; Barbosa, Jorge	OCEANS 2017 - ABERDEEN	2017
4	Development and Experimental Testing of an Autonomous Jellyfish Detection and Removal Robot System	Kim, Donghoon; Shin, Jae-Uk; Kim, Hyungjin; Kim, Hanguen; Lee, Donghwa; Lee, Seung-Mok; Myung, Hyun	INTERNATIONAL JOURNAL OF CONTROL AUTOMATION AND SYSTEMS	2016
1	Distance Estimation for Marine Vehicles Using a Monocular Video Camera	Gladstone, Ran; Moshe, Yair; Bard, Avihai; Shenhav, Elior	2016 24TH EUROPEAN SIGNAL PROCESSING CONFERENCE (EUSIPCO)	2016
4	Tracking of Marine Surface Objects from Unmanned Aerial Vehicles with a Pan/Tilt Unit using a Thermal Camera and Optical Flow	Helgesen, Hakon Hagen; Leira, Frederik Stendahl; Johansen, Tor Arne; Fossen, Thor I.	2016 INTERNATIONAL CONFERENCE ON UNMANNED AIRCRAFT SYSTEMS (ICUAS)	2016
1	On Model Parameters Identification and Fuzzy Self-adaptive Course Control for USV	Fan Yunsheng; Sun Xiaojie; Wang Guofeng	PROCEEDINGS OF THE 28TH CHINESE CONTROL AND DECISION CONFERENCE (2016 CCDC)	2016
4	Trajectory Tracking for Underactuated UUV Using Terminal Sliding Mode Control	Wang Shikai; Jin Hongzhang; Meng Lingwei	PROCEEDINGS OF THE 28TH CHINESE CONTROL AND DECISION CONFERENCE (2016 CCDC)	2016
2	Hydrodynamic characterization of USV vessels with innovative SWATH configuration for coastal monitoring and low environmental impact	Zaghi, Stefano; Dubbioso, Giulio; Broglia, Riccardo; Muscari, Roberto	TRANSPORT RESEARCH ARENA TRA2016	2016
4	An Euclidean norm based criterion to assess robots' 2D path-following performance	Saggini, Eleonora; Torrente, Maria-Laura	JOURNAL OF ALGEBRAIC STATISTICS	2016
4	Active control design for an unmanned air vehicle with a morphing wing	Li, Daochun; Guo, Shijun; Aburass, Tariq Osman; Yang, Daqing; Xiang, Jinwu	AIRCRAFT ENGINEERING AND AEROSPACE TECHNOLOGY	2016
4	Human Exploration Missions to Phobos Prior to Crewed Mars Surface Missions	Gernhardt, Michael L.; Bekdash, Omar S.; Li, Zu Qun; Abercromby, Andrew F. J.; Chappell, Steven P.; Beaton, Kara H.; Bielski, Paul; Crues, Edwin Z.	2016 IEEE AEROSPACE CONFERENCE	2016
1	USV Model Identification and Course Control	Mu, Dongdong; Zhao, Yongsheng; Wang, Guofeng; Fan, Yunsheng; Bai, Yiming	2016 SIXTH INTERNATIONAL CONFERENCE ON INFORMATION SCIENCE AND TECHNOLOGY (ICIST)	2016
1	Trajectory-Linearization Based Robust Model Predictive Control for Constrained Unmanned Surface Vessels	Wang, Liang; Sun, Tairen; Yu, Xin	INFORMATION TECHNOLOGY AND CONTROL	2016
4	A 3D Dynamic Voronoi Diagram-Based Path-Planning System for UUVs	Candeloro, Mauro; Lekkas, Anastasios M.; Hegde, Jeevith; Sorensen, Asgeir J.	OCEANS 2016 MTS/IEEE MONTEREY	2016
4	USE OF BIOLOGICAL ADHESIVE FOR EFFECTIVE DUST SUPPRESSION IN MINING OPERATIONS	Danilov, Aleksandr Sergeevich; Smirnov, Yuri Dmitrievich; Pashkevich, Maria Anatolievna	JOURNAL OF ECOLOGICAL ENGINEERING	2015
1	Neural network fault diagnosis of a trolling motor based on feature reduction techniques for an unmanned surface vehicle	Abed, Wathiq; Sharma, Sanjay; Sutton, Robert	PROCEEDINGS OF THE INSTITUTION OF MECHANICAL ENGINEERS PART I-JOURNAL OF SYSTEMS AND CONTROL ENGINEERING	2015
1	Active Fault Tolerant Control of an Unmanned Surface Vehicle	Liu, Zhixiang; Zhang, Youmin; Yuan, Chi	2015 15TH INTERNATIONAL CONFERENCE ON CONTROL, AUTOMATION AND SYSTEMS (ICCAS)	2015
1	Parameter Identification and Validation Analysis for a Small USV	Wirtensohn, Stefan; Wenzl, Hanna; Tietz, Thomas; Reuter, Johannes	2015 20TH INTERNATIONAL CONFERENCE ON METHODS AND MODELS IN AUTOMATION AND ROBOTICS (MMAR)	2015
1	Design of Information Network and Control System for USV	Fan Yunsheng; Ge Zenglu; Zhao Yongsheng; Wang Guofeng	2015 54TH ANNUAL CONFERENCE OF THE SOCIETY OF INSTRUMENT AND CONTROL ENGINEERS OF JAPAN (SICE)	2015
2	Innovative Technology Development for Arctic Exploration	Cross, J. N.; Mordy, C. W.; Tabisola, H. M.; Meinig, C.; Cokelet, E. D.; Stabeno, P. J.	OCEANS 2015 - MTS/IEEE WASHINGTON	2015
1	USV Course Controller Optimization Based on Elitism Estimation of Distribution Algorithm	Xu, Qingyang	2014 IEEE CHINESE GUIDANCE, NAVIGATION AND CONTROL CONFERENCE (CGNCC)	2014
1	Underway Path-planning for an Unmanned Surface Vehicle Performing Cooperative Navigation for UUVs at Varying Depths	Hudson, J.; Seto, M. L.	2014 IEEE/RSJ INTERNATIONAL CONFERENCE ON INTELLIGENT ROBOTS AND SYSTEMS (IROS 2014)	2014
1	An A Priori Planning of Joint Motions for USV as a Problem of Guaranteed Control/Estimation	Kruglikov, Sergey V.; Kruglikov, Alexey S.	CURRENT DEVELOPMENT OF MECHANICAL ENGINEERING AND ENERGY, PTS 1 AND 2	2014
4	Investigation of the aerodynamic characteristics of an aerofoil shaped fuselage UAV model	Alam, G. M. Jahangir; Mamun, Md.; Ali, Md. Abu Taher; Islam, Md. Quamrul; Islam, A. K. M. Sadrul	10TH INTERNATIONAL CONFERENCE ON MECHANICAL ENGINEERING (ICME 2013)	2014
2	Three-Dimensional Reconstruction of Bridge Structures above the Waterline with an Unmanned Surface Vehicle	Han, Jungwook; Park, Jeonghong; Kim, Jinwhan	2014 IEEE/RSJ INTERNATIONAL CONFERENCE ON INTELLIGENT ROBOTS AND SYSTEMS (IROS 2014)	2014
1	Experimental Testing of an Adaptive Controller for USVs with Uncertain Displacement and Drag	Klinger, Wilhelm B.; Bertaska, Ivan R.; von Ellenrieder, Karl D.	2014 OCEANS - ST. JOHN'S	2014
1	An online adaptive logic-oriented neural approach for tracking control	Sun Qiaomei; Ren Guang	OCEAN ENGINEERING	2013
4	Aurelia aurita Inspired Artificial Mesoglea	Joshi, Keyur; Villanueva, Alex; Smith, Colin; Maurya, Deepam; Blottman, John; Priya, Shashank	INTEGRATED FERROELECTRICS	2013
4	Supervisory Traction Control for a Slipping UGV	Broderick, John A.; Tilbury, Dawn M.; Atkins, Ella M.	2013 AMERICAN CONTROL CONFERENCE (ACC)	2013
4	Lightweight tablet devices for command and control of ROS-enabled robots	Speers, Andrew; Forooshani, Parisa Mojiri; Dicke, Michael; Jenkin, Michael	2013 16TH INTERNATIONAL CONFERENCE ON ADVANCED ROBOTICS (ICAR)	2013
2	Homing an Unmanned Underwater Vehicle Equipped with a DUSBL to an Unmanned Surface Platform: A Feasibility Study	Miranda, Mario, II; Beaujean, Pierre-Philippe; An, Edgar; Dhanak, Manhar	2013 OCEANS - SAN DIEGO	2013
1	A Decision Support Framework for Collision Avoidance of Unmanned Maritime Vehicles	Abu-Tair, Mamun; Naeem, Wasif	INTELLIGENT COMPUTING FOR SUSTAINABLE ENERGY AND ENVIRONMENT	2013
4	UAV Decision-making for Maritime Rescue based on Bayesian Network	Tang Tao; Ren Jia	PROCEEDINGS OF 2012 2ND INTERNATIONAL CONFERENCE ON COMPUTER SCIENCE AND NETWORK TECHNOLOGY (ICCSNT 2012)	2012
4	They Blazed the Trail for the Space Pioneers (On Some Little-Known Ukrainian Names in the History of Astronautics and Rocketry)	Ventskovsky, Oleg; Vavilova, Iryna; Yatskiv, Yaroslav	HISTORY OF ROCKETRY AND ASTRONAUTICS	2012
4	Preswirl Maneuvering Propulsor	Huyer, Stephen A.; Dropkin, Amanda; Beal, David N.; Farnsworth, John A. N.; Amitay, Michael	IEEE JOURNAL OF OCEANIC ENGINEERING	2012
4	Design, analysis and experimental validation of a morphing UAV wing	Bolinches, M.; Keane, A. J.; Forrester, A. I. J.; Scanlan, J. P.; Takeda, K.	AERONAUTICAL JOURNAL	2011
1 and 2	Improving Coastal Operations With Unmanned Surface Vehicles Charlie USV Overcomes Common Problems By Utilizing Dual-Communications System, Acoustic Integration, Mission Control	Bruzzone, Gabriele; Bibuli, Marco; Caccia, Massimo	SEA TECHNOLOGY	2011
4	Autonomous landing and ingress of micro-air-vehicles in urban environments based on monocular vision.	Brockers, Roland; Bouffard, Patrick; Ma, Jeremy; Matthies, Larry; Tomlin, Claire	MICRO- AND NANOTECHNOLOGY SENSORS, SYSTEMS, AND APPLICATIONS III	2011
2	A Development Project of Autonomous Marine Surface Vehicles for Sea Demining	Pereda, Fernando J.; Garcia de Marina, Hector; Francisco Jimenez, Juan; Giron-Sierra, Jose M.	11TH INTERNATIONAL CONFERENCE ON CONTROL, AUTOMATION, ROBOTICS AND VISION (ICARCV 2010)	2010
1	TRAJECTORY REAL-TIME OBSTACLE AVOIDANCE FOR UNDERACTUATED UNMANNED SURFACE VESSELS	Soltan, Reza A.; Ashrafiuon, Hashem; Muske, Kenneth R.	PROCEEDINGS OF THE ASME INTERNATIONAL DESIGN ENGINEERING TECHNICAL CONFERENCES AND COMPUTERS AND INFORMATION IN ENGINEERING CONFERENCE, VOL 7, PTS A AND B	2010
4	Control of Underwater Vehicles in Full Unsteady Flow	Levedahl, Blaine A.; Silverberg, L.	IEEE JOURNAL OF OCEANIC ENGINEERING	2009
1	Theoretical and experimental investigation of unmanned boat electric propulsion system with PMDC motor and waterjet	Xiros, N. I.; Logis, E.; Gaspaons, L.; Tsolakidis, S.; Kardasis, K.	JOURNAL OF MARINE ENGINEERING AND TECHNOLOGY	2009
4	Covering Hostile Terrains with Partial and Complete Visibilities: On Minimum Distance Paths	Mohan, Mahesh; Sawhney, Rahul; Krishna, K. Madhava; Srinathan, K.; Srikanth, M. B.	2008 IEEE/RSJ INTERNATIONAL CONFERENCE ON ROBOTS AND INTELLIGENT SYSTEMS, VOLS 1-3, CONFERENCE PROCEEDINGS	2008
1	3-d unsteady computations of flapping flight in insects, fish, and unmanned vehicles	Sandberg, William C.; Ramamurti, Ravi	BIO-MECHANISMS OF SWIMMING AND FLYING: FLUID DYNAMICS, BIOMIMETIC ROBOTS, AND SPORTS SCIENCE	2008
4	Prognostics and health management as design variable in air-vehicle conceptual design	Bodden, David S.; Hadden, Wes; Grube, Bill E.; Clements, N. Scott	JOURNAL OF AIRCRAFT	2006
4	Vehicle mounted SAR-GPR and its evaluation	Sato, Motoyuki; Kobayashi, Takao; Takahashi, Kazunori; Fujiwara, Jun; Feng, Xuan	DETECTION AND REMEDIATION TECHNOLOGIES FOR MINES AND MINELIKE TARGETS XI, PTS 1 AND 2	2006
1	Multi-robot operator control unit	Powell, D.; Gilbreath, G.; Bruch, M.	UNMANNED SYSTEMS TECHNOLOGY VIII, PTS 1 AND 2	2006
4	PHM as a design variable in air vehicle conceptual design	Bodden, David S.; Hadden, Wes; Grube, Bill E.; Clements, N. Scott	2005 IEEE Aerospace Conference, Vols 1-4	2005
1	Development of an autonomous planing watercraft test bed	Woelfel, GA; Ehrhardt, BJ; Bishop, BE	PROCEEDINGS OF THE THIRTY-SIXTH SOUTHEASTERN SYMPOSIUM ON SYSTEM THEORY	2004
1	Obstacle Tracking for Unmanned Surface Vessels Using 3-D Point Cloud	Muhovic, Jon; Mandeljc, Rok; Bovcon, Borja; Kristan, Matej; Pers, Janez	IEEE JOURNAL OF OCEANIC ENGINEERING	2020
1	Adaptive trajectory tracking algorithm of unmanned surface vessel based on anti-windup compensator with full-state constraints	Qin, Hongde; Li, Chengpeng; Sun, Yanchao; Wang, Ning	OCEAN ENGINEERING	2020
1 and 2	Accuracy of Trajectory Tracking Based on Nonlinear Guidance Logic for Hydrographic Unmanned Surface Vessels	Stateczny, Andrzej; Burdziakowski, Pawel; Najdecka, Klaudia; Domagalska-Stateczna, Beata	SENSORS	2020
1	Iterative Learning-Based Path and Speed Profile Optimization for an Unmanned Surface Vehicle	Yang, Yang; Li, Quan; Zhang, Junnan; Xie, Yangmin	SENSORS	2020
1	Convolutional neural network based obstacle detection for unmanned surface vehicle	Ma, Liyong; Xie, Wei; Huang, Haibin	MATHEMATICAL BIOSCIENCES AND ENGINEERING	2020
1	State-of-the-Art Research on Motion Control of Maritime Autonomous Surface Ships	Wang, Le; Wu, Qing; Liu, Jialun; Li, Shijie; Negenborn, Rudy R.	JOURNAL OF MARINE SCIENCE AND ENGINEERING	2019
1	Fault-tolerant Compensation Control Based on Sliding Mode Technique of Unmanned Marine Vehicles Subject to Unknown Persistent Ocean Disturbances	Hao, Li-Ying; Zhang, He; Yue, Wei; Li, Hui	INTERNATIONAL JOURNAL OF CONTROL AUTOMATION AND SYSTEMS	2020
1	A novel GPS/DVL/MEMS-INS smartphone sensors integrated method to enhance autonomous navigation, guidance and control system of AUSVs based on ADSF Combined Filter	Mostafa, Mohamed Z.; Khater, Hatem A.; Rizk, Mohamed R.; Bahasan, Abdullah M.	MEASUREMENT	2019
4	Traversability Assessment and Trajectory Planning of Unmanned Ground Vehicles with Suspension Systems on Rough Terrain	Zhang, Kai; Yang, Yi; Fu, Mengyin; Wang, Meiling	SENSORS	2019
4	Received Signal Strength Indication (RSSI) of 2.4 GHz and 5 GHz Wireless Local Area Network Systems Projected over Land and Sea for Near-Shore Maritime Robot Operations	Yamamoto, Brennan; Wong, Allison; Agcanas, Peter Joseph; Jones, Kai; Gaspar, Dominic; Andrade, Raymond; Trimble, A. Zachary	JOURNAL OF MARINE SCIENCE AND ENGINEERING	2019
1	Intelligent multi-task allocation and planning for multiple unmanned surface vehicles (USVs) using self-organising maps and fast marching method	Liu, Yuanchang; Song, Rui; Bucknall, Richard; Zhang, Xinyu	INFORMATION SCIENCES	2019
2	Autonomous tracking of an oceanic thermal front by a Wave Glider	Zhang, Yanwu; Rueda, Carlos; Kieft, Brian; Ryan, John P.; Wahl, Christopher; O'Reilly, Thomas C.; Maughan, Thom; Chavez, Francisco P.	JOURNAL OF FIELD ROBOTICS	2019
1	Robust sliding mode control for a USV water-jet system	Kim, HyunWoo; Lee, Jangmyung	INTERNATIONAL JOURNAL OF NAVAL ARCHITECTURE AND OCEAN ENGINEERING	2019
1	Deep reinforcement learning-based controller for path following of an unmanned surface vehicle	Woo, Joohyun; Yu, Chanwoo; Kim, Nakwan	OCEAN ENGINEERING	2019
1	Voronoi-Visibility Roadmap-based Path Planning Algorithm for Unmanned Surface Vehicles	Niu, Hanlin; Al Savvaris; Tsourdos, Antonios; Ji, Ze	JOURNAL OF NAVIGATION	2019
4	In Situ and Satellite Sea Surface Salinity in the Algerian Basin Observed through ABACUS Glider Measurements and BEC SMOS Regional Products	Aulicino, Giuseppe; Cotroneo, Yuri; Olmedo, Estrella; Cesarano, Cinzia; Fusco, Giannetta; Budillon, Giorgio	REMOTE SENSING	2019
2	COMPARING AIR-SEA FLUX MEASUREMENTS FROM A NEW UNMANNED SURFACE VEHICLE AND PROVEN PLATFORMS DURING THE SPURS-2 FIELD CAMPAIGN	Zhang, Dongxiao; Cronin, Meghan F.; Meinig, Christian; Farrar, J. Thomas; Jenkins, Richard; Peacock, David; Keene, Jennifer; Sutton, Adrienne; Yang, Qiong	OCEANOGRAPHY	2019
2	Launch and Recovery of an Autonomous Underwater Vehicle From a Station-Keeping Unmanned Surface Vehicle	Sarda, Edoardo I.; Dhanak, Manhar R.	IEEE JOURNAL OF OCEANIC ENGINEERING	2019
1	Unscented Kalman Filter trained neural network control design for ship autopilot with experimental and numerical approaches	Wang, Yuanyuan; Chai, Shuhong; Hung Duc Nguyen	APPLIED OCEAN RESEARCH	2019
2	Rendezvous Planning for Multiple AUVs With Mobile Charging Stations in Dynamic Currents	Li, Bingxi; Page, Brian R.; Hoffman, John; Moridian, Barzin; Mahmoudian, Nina	IEEE ROBOTICS AND AUTOMATION LETTERS	2019
1	Unmanned Surface Vehicle Simulator with Realistic Environmental Disturbances	Paravisi, Marcelo; Santos, Davi H.; Jorge, Vitor; Heck, Guilherme; Goncalves, Luiz Marcos; Amory, Alexandre	SENSORS	2019
1	A new guidance law for trajectory tracking of an underactuated unmanned surface vehicle with parameter perturbations	Huang, Haibin; Gong, Mian; Zhuang, Yufei; Sharma, Sanjay; Xu, Dianguo	OCEAN ENGINEERING	2019
2	Automated Survey in Very Shallow Water using an Unmanned Surface Vehicle	Kurowski, Martin; Thal, Janis; Damerius, Robert; Korte, Holger; Jeinsch, Torsten	IFAC PAPERSONLINE	2019
1	A Novel Distributed and Self-Organized Swarm Control Framework for Underactuated Unmanned Marine Vehicles	Liang, Xiao; Qu, Xingru; Wang, Ning; Li, Ye; Zhang, Rubo	IEEE ACCESS	2019
1	Self-Adaptive Dynamic Obstacle Avoidance and Path Planning for USV Under Complex Maritime Environment	Liu, Xinyu; Li, Yun; Zhang, Jing; Zheng, Jian; Yang, Chunxi	IEEE ACCESS	2019
1	Formation Control of Multiple Unmanned Surface Vehicles Using the Adaptive Null-Space-Based Behavioral Method	Fan, Jiajia; Liao, Yulei; Li, Ye; Jiang, Quanquan; Wang, Leifeng; Jiang, Wen	IEEE ACCESS	2019
1	Global Path Planning for Unmanned Surface Vehicle Based on Improved Quantum Ant Colony Algorithm	Xia, Guoqing; Han, Zhiwei; Zhao, Bo; Liu, Caiyun; Wang, Xinwei	MATHEMATICAL PROBLEMS IN ENGINEERING	2019
4	A CPU-GPU Hybrid System of Environment Perception and 3D Terrain Reconstruction for Unmanned Ground Vehicle	Song, Wei; Zou, Shuanghui; Tian, Yifei; Sun, Su; Fong, Simon; Cho, Kyungeun; Qiu, Lvyang	JOURNAL OF INFORMATION PROCESSING SYSTEMS	2018
1	PATH FOLLOWING CONTROLLER DESIGN FOR UNMANNED SURFACE VEHICLE BASED ON TRAJECTORY LINEARIZATION CONTROL	Qiu, Bingbing; Wang, Guofeng; Fan, Yunsheng; Mu, Dongdong; Sun, Xiaojie	INTERNATIONAL JOURNAL OF INNOVATIVE COMPUTING INFORMATION AND CONTROL	2018
4	A review on snake robot testbeds in granular and restricted maneuverability spaces	Xiao, Xuesu; Murphy, Robin	ROBOTICS AND AUTONOMOUS SYSTEMS	2018
1 and 2	An Aquatic Mobile Sensing USV Swarm with a Link Quality-Based Delay Tolerant Network	Sousa, Daniela; Luis, Miguel; Sargento, Susana; Pereira, Artur	SENSORS	2018
4	A Operational Concept for Correcting Navigation Drift During Sonar Surveys of the Seafloor	Hunter, Alan J.; Connors, Warren A.; Dugelay, Samantha	IEEE JOURNAL OF OCEANIC ENGINEERING	2018
1	Incremental predictive control-based output consensus of networked unmanned surface vehicle formation systems	Liu, Zhao-Qing; Wang, Yu-Long; Wang, Tian-Bao	INFORMATION SCIENCES	2018
4	Experiments of Propeller-Induced Flow Effects on a Low-Reynolds-Number Wing	Ananda, Gavin K.; Selig, Michael S.; Deters, Robert W.	AIAA JOURNAL	2018
1 and 2	Energy Consumption Research of Mobile Data Collection Protocol for Underwater Nodes Using an USV	Lv, Zhichao; Zhang, Jie; Jin, Jiucai; Li, Qi; Gao, Baoru	SENSORS	2018
4	Multimedia System for Real-Time Photorealistic Nonground Modeling of 3D Dynamic Environment for Remote Control System	Phuong Minh Chu; Cho, Seoungjae; Sim, Sungdae; Kwak, Kiho; Chol, Kyungeun	SYMMETRY-BASEL	2018
1	Towards use of Dijkstra Algorithm for Optimal Navigation of an Unmanned Surface Vehicle in a Real-Time Marine Environment with results from Artificial Potential Field	Singh, Y.; Sharma, S.; Sutton, R.; Hatton, D.	TRANSNAV-INTERNATIONAL JOURNAL ON MARINE NAVIGATION AND SAFETY OF SEA TRANSPORTATION	2018
1	Model Predictive Control of Permanent Magnet Synchronous Propulsion Motor Applied in USV with Composite Ship-propeller Load	Luo, Peng; Zhao, Hong; Guo, Chen; Cheng, Shichao	2018 8TH INTERNATIONAL CONFERENCE ON INFORMATION SCIENCE AND TECHNOLOGY (ICIST 2018)	2018
1	Cybersecurity Attacks and Defences for Unmanned Smart Ships	Silverajan, Bilhanan; Ocak, Mert; Nagel, Benjamin	IEEE 2018 INTERNATIONAL CONGRESS ON CYBERMATICS / 2018 IEEE CONFERENCES ON INTERNET OF THINGS, GREEN COMPUTING AND COMMUNICATIONS, CYBER, PHYSICAL AND SOCIAL COMPUTING, SMART DATA, BLOCKCHAIN, COMPUTER AND INFORMATION TECHNOLOGY	2018
4	Trajectory Tracking Control of an Underactuated UUV Using a Novel Nonlinear Integral Sliding Mode Surface	Yu, Haomiao; Guo, Chen; Li, Hui; Shen, Zhipeng	2018 37TH CHINESE CONTROL CONFERENCE (CCC)	2018
4	Backstepping Control based on Sliding Mode for Station-Keeping of Stratospheric Airship	Parsa, Ashkan; Monfared, Sadra Borji; Kalhor, Ahmad	2018 6TH RSI INTERNATIONAL CONFERENCE ON ROBOTICS AND MECHATRONICS (ICROM 2018)	2018
1	An Integral Line-of-Sight Guidance Law with a Speed-dependent Lookahead Distance	Wiig, Martin S.; Pettersen, Kristin Y.; Ruud, Else-Line M.; Krogstad, Thomas R.	2018 EUROPEAN CONTROL CONFERENCE (ECC)	2018
1	Unlocking the power of combined autonomous operations with underwater and surface vehicles: success with a deep-water survey AUV and USV mothership	Proctor, Alison A.; Zarayskaya, Yulia; Bazhenova, Evgenia; Sumiyoshi, Masanao; Wigley, Rochelle; Roperez, Jaya; Zwolak, Karolina; Sattiabaruth, Seeboruth; Sade, Hadar; Tinmouth, Neil; Simpson, Benjamin; Kristoffersen, Stian Michael	2018 OCEANS - MTS/IEEE KOBE TECHNO-OCEANS (OTO)	2018
1	Obstacle Detection for USVs by Joint Stereo-View Semantic Segmentation	Bovcon, Borja; Kristan, Matej	2018 IEEE/RSJ INTERNATIONAL CONFERENCE ON INTELLIGENT ROBOTS AND SYSTEMS (IROS)	2018
1	Catenary Tether Shape Analysis for a UAV - USV Team	Talke, Kurt A.; de Oliveira, Mauricio; Bewley, Thomas	2018 IEEE/RSJ INTERNATIONAL CONFERENCE ON INTELLIGENT ROBOTS AND SYSTEMS (IROS)	2018
1	Design an Adaptive Autopilot for an Unmanned Surface Vessel	Dinh Due Vo; Viet Anh Pham; Duy Anh Nguyen	PROCEEDINGS OF 2018 4TH INTERNATIONAL CONFERENCE ON GREEN TECHNOLOGY AND SUSTAINABLE DEVELOPMENT (GTSD)	2018
1	Experimental Testing of a Path Manager for Unmanned Surface Vehicles in Survey Missions	Iovino, S.; Savvaris, A.; Tsourdos, A.	IFAC PAPERSONLINE	2018
1	Experimental Evaluation of Shore to Unmanned Surface Vehicle Wi-Fi Communications	Coelho, Andre; Lopes, Mario; Ferreira, Bruno; Campos, Rui; Ricardo, Manuel	PROCEEDINGS OF THE 2018 WIRELESS DAYS (WD)	2018
1	Teleoperated path following and trajectory tracking of unmanned vehicles using spatial auditory guidance system	Vasilijevic, Antonio; Jambrosic, Kristian; Vukic, Zoran	APPLIED ACOUSTICS	2018
1	Integral sliding mode based finite-time trajectory tracking control of unmanned surface vehicles with input saturations	Wang, Ning; Gao, Ying; Lv, Shuailin; Er, Meng Joo	INDIAN JOURNAL OF GEO-MARINE SCIENCES	2017
1	Disturbance/Uncertainty estimation based accurate trajectory tracking control of an unmanned surface vehicle with system uncertainties and external disturbances	Wang, Ning; Lv, Shuailin; Gao, Ying; Er, Meng Joo	INDIAN JOURNAL OF GEO-MARINE SCIENCES	2017
1	Design and research of automobile anti-collision warning system based on monocular vision sensor with license plate cooperative target	Qin, Lijuan; Wang, Ting	MULTIMEDIA TOOLS AND APPLICATIONS	2017
1	Podded Propulsion Unmanned Surface Vehicle Model Identification Based on Field Experiments	Mu, Dongdong; Wang, Guofeng; Fan, Yunsheng; Bai, Yiming	PROCEEDINGS OF THE 36TH CHINESE CONTROL CONFERENCE (CCC 2017)	2017
1	A Novel Fast Terminal Sliding Mode Control Method Based on Immersion and Invariance for Course Control of USV	Xue Wentao; Zhang Chen; Li Jianzhen; Wang Yulong	PROCEEDINGS OF THE 36TH CHINESE CONTROL CONFERENCE (CCC 2017)	2017
1	Adaptive line-of-sight guidance law for synchronized path-following of under-actuated unmanned surface vehicles based on low-frequency learning	Gu, Nan; Wang, Dan; Liu, Lu; Zhang, Bin; Peng, Zhouhua	PROCEEDINGS OF THE 36TH CHINESE CONTROL CONFERENCE (CCC 2017)	2017
1	Deep Convolutional Neural Network Based Unmanned Surface Vehicle Maneuvering	Xu, Qingvang; Zhang, Chengjin; Zhang, Li	2017 CHINESE AUTOMATION CONGRESS (CAC)	2017
1 and 2	A Hexagonal Grid-based Sampling Planner for Aquatic Environmental Monitoring using Unmanned Surface Vehicles	Li, Teng; Xia, Min; Chen, Jiahong; Gao, Shujun; de Silva, Clarence	2017 IEEE INTERNATIONAL CONFERENCE ON SYSTEMS, MAN, AND CYBERNETICS (SMC)	2017
1	Effective Waterline Detection for Unmanned Surface Vehicles in Inland Water	Zhan, Wenqiang; Xiao, Changshi; Yuan, Haiwen; Wen, Yuanqiao	PROCEEDINGS OF THE 2017 SEVENTH INTERNATIONAL CONFERENCE ON IMAGE PROCESSING THEORY, TOOLS AND APPLICATIONS (IPTA 2017)	2017
1	Underwater Acoustic-based Navigation towards Multi-vehicle Operation and Adaptive Oceanographic Sampling	Zhou, Mingxi; Bachmayer, Ralf; de Young, Brad	2017 IEEE/RSJ INTERNATIONAL CONFERENCE ON INTELLIGENT ROBOTS AND SYSTEMS (IROS)	2017
1	Research of USV Obstacle Avoidance Strategy Based on Dynamic Window	Lin, Xiaogong; Fu, Yang	2017 IEEE INTERNATIONAL CONFERENCE ON MECHATRONICS AND AUTOMATION (ICMA)	2017
1	Model Predictive Controller Design with Disturbance Observer for Path Following of Unmanned Surface Vessel	Liu, Zhilin; Geng, Chao; Zhang, Jun	2017 IEEE INTERNATIONAL CONFERENCE ON MECHATRONICS AND AUTOMATION (ICMA)	2017
1	Disturbance Observer Based Finite-Time Trajectory Tracking Control of Unmanned Surface Vehicles with Unknown Dead-Zones	Gao, Ying; Wang, Ning; Zhang, Weidong	2017 32ND YOUTH ACADEMIC ANNUAL CONFERENCE OF CHINESE ASSOCIATION OF AUTOMATION (YAC)	2017
1	Study on the MMG three-degree-of-freedom motion model of a sailing vessel	You, Xu; Huang, Ming; Ma, Feng; He, Wei	2017 4TH INTERNATIONAL CONFERENCE ON TRANSPORTATION INFORMATION AND SAFETY (ICTIS)	2017
4	First principle analysis of Coanda Micro Air Vehicle aerodynamic forces for preliminary sizing	Djojodihardjo, Harijono; Ahmed, Riyadh Ibraheem; Abu Talib, Abd Rahim; Rafie, Azmin Shakrine Mohd	AIRCRAFT ENGINEERING AND AEROSPACE TECHNOLOGY	2017
2	Application of a Winch-type Towed Acoustic Sensor to a Wave-powered Unmanned Surface Vehicle	Moh, Taejun; Jang, Namdo; Jang, Seok; Cho, Jin Hyung	DEFENCE SCIENCE JOURNAL	2017
1	Rapid Environmental Picture Atlantic exercise 2016: Field Report	Ferreira, Antonio Sergio; Pereira, Joao; Pinto, Jose; Dias, Paulo; Sousa, Joao; Lourenco, Paulo	OCEANS 2017 - ABERDEEN	2017
2	A Compact, Low-Cost Unmanned Surface Vehicle for Shallow Inshore Applications	Metcalfe, Ben; Thomas, Ben; Treloar, Alfie; Rymansaib, Zuhayr; Hunter, Alan; Wilson, Peter	PROCEEDINGS OF THE 2017 INTELLIGENT SYSTEMS CONFERENCE (INTELLISYS)	2017
3	Toward Resilient Unmanned Maritime Systems (UMS)	Nuss, Andrew; Blackburn, Timothy; Garstenauer, Andreas	NAVAL ENGINEERS JOURNAL	2016
1	USV attitude estimation: an approach using quaternion in direction cosine matrix	Onunka, Chiemela; Bright, Glen; Stopforth, Riaan	ROBOTICA	2016
4	Aerodynamic performance analysis of a winged re-entry vehicle from hypersonic down to subsonic speed	Pezzella, Giuseppe; Viviani, Antonio	AEROSPACE SCIENCE AND TECHNOLOGY	2016
1	Disturbance Observer Based Finite-Time Trajectory Tracking Control of Unmanned Surface Vehicles	Lv, Shuailin; Wang, Ning; Gao, Ying; Er, Meng Joo	2016 IEEE 6TH INTERNATIONAL CONFERENCE ON UNDERWATER SYSTEM TECHNOLOGY: THEORY AND APPLICATIONS	2016
1	The vulnerability of unmanned vehicles to terrorist attacks such as Global Navigation Satellite System spoofing	Dobryakova, Larisa; Lemieszewski, Lukasz; Ochin, Evgeny	SCIENTIFIC JOURNALS OF THE MARITIME UNIVERSITY OF SZCZECIN-ZESZYTY NAUKOWE AKADEMII MORSKIEJ W SZCZECINIE	2016
2	A Low Cost USV for Aqua Farm Inspection	Osen, Ottar L.; Havnegjerde, Albert; Kamsvag, Vegard; Liavaag, Sveinung; Bye, Robin T.	TECHNO-OCEAN 2016: RETURN TO THE OCEANS	2016
2	Experimental testing of a cooperative ASV-ROY multi-agent system	Conte, Giuseppe; Scaradozzi, David; Mannocchi, Daniele; Raspa, Paolo; Panebianco, Luca; Screpanti, Laura	IFAC PAPERSONLINE	2016
1	ERON: A Flexible Autonomous Surface Vessel	Demetriou, G. A.; Ioannou, S.; Hadjipieri, A.; Panayidou, I. E.; Papasavva, A.; Savva, A. P.	2016 24TH MEDITERRANEAN CONFERENCE ON CONTROL AND AUTOMATION (MED)	2016
2	Design and Development of an Autonomous Surface Vessel for Inland Water Depth Monitoring	Idris, Mohamad Hilmi bin Mat; Kamarudin, Muhammad Al Azhari bin Che; Sahalan, Muhammad Irsyad; Abidin, Zulkifli bin Zainal; Rashid, Muhammad Mahbubur	PROCEEDINGS OF 6TH INTERNATIONAL CONFERENCE ON COMPUTER AND COMMUNICATION ENGINEERING (ICCCE 2016)	2016
4	Field Report: Autonomous Lake Bed Depth Mapping by a Portable Semi-submersible USV at Mt. Zao Okama Crater Lake	Watanabe, Atsushi; Kuri, Miwa; Nagatani, Keiji	2016 IEEE INTERNATIONAL SYMPOSIUM ON SAFETY, SECURITY, AND RESCUE ROBOTICS (SSRR)	2016
1	Automatic Water Line Detection for an USV System	Wei, Yangjie; He, Yuqing	2016 IEEE INTERNATIONAL CONFERENCE ON CYBER TECHNOLOGY IN AUTOMATION, CONTROL, AND INTELLIGENT SYSTEMS (CYBER)	2016
1	Fault Detection Filter and Controller Design for Unmanned Surface Vehicles	Wang, Yu-Long; Han, Qing-Long; Wang, Tian-Bao; Peng, Chen	PROCEEDINGS OF THE 2016 12TH WORLD CONGRESS ON INTELLIGENT CONTROL AND AUTOMATION (WCICA)	2016
2	Active and passive underwater acoustic applications using an Unmanned Surface Vehicle	Jin, Jiucai; Zhang, Jie; Lv, Zhichao; Shao, Feng; Li, Ming; Liu, Lanjun; Zhang, Pengcheng	OCEANS 2016 - SHANGHAI	2016
2	Development of Unmanned Surface Vehicle for Smart Water Quality Inspector	Siyang, Satetha; Kerdcharoen, Teerakiat	2016 13TH INTERNATIONAL CONFERENCE ON ELECTRICAL ENGINEERING/ELECTRONICS, COMPUTER, TELECOMMUNICATIONS AND INFORMATION TECHNOLOGY (ECTI-CON)	2016
4	Efficient Visual SLAM using Selective Image Registration for Autonomous Inspection of Underwater Structures	Hong, Sconghun; Kim, Jinwhan	2016 IEEE/OES AUTONOMOUS UNDERWATER VEHICLES (AUV)	2016
4	Built-in hyperspectral camera for smartphone in visible, near-infrared and middle-infrared lights region (first report): Trial products of beans-size Fourier-spectroscopic line-imager and feasibility experimental results of middle infrared spectroscopic imaging	Ishimaru, Ichiro; Kawashima, Natsumi; Hosono, Satsuki	NEXT-GENERATION SPECTROSCOPIC TECHNOLOGIES IX	2016
1	Development of a Remotely Controlled Testing Platform with Low-drag Air-ventilated Hull	Matveev, Konstantin I.; Perry, Nicholaus I.; Mattson, Alexander W.; Chaney, Christopher S.	JOURNAL OF MARINE SCIENCE AND APPLICATION	2015
1	Human-computer interface studies for semi-autonomous unmanned surface vessels	Osga, Glenn A.; McWilliams, Michael R.	6TH INTERNATIONAL CONFERENCE ON APPLIED HUMAN FACTORS AND ERGONOMICS (AHFE 2015) AND THE AFFILIATED CONFERENCES, AHFE 2015	2015
4	Numerical Simulation Study on Propeller Slipstream Interference of High Altitude Long Endurance Unmanned Air Vehicle	Chen, Guangqiang; Chen, Bingyan; Li, Pengfei; Bai, Peng; Ji, Chuqun	2014 ASIA-PACIFIC INTERNATIONAL SYMPOSIUM ON AEROSPACE TECHNOLOGY, APISAT2014	2015
1	A Survey of Motion Control for Marine Vehicles	Qi, Ai-Chun; Han, Qing-Long; Wang, Yu-Long	2015 34TH CHINESE CONTROL CONFERENCE (CCC)	2015
4	A cascaded adaptive UUV tracking control design with ocean current	Sun, Bing; Mei, Man; Zhu, Daqi	2015 34TH CHINESE CONTROL CONFERENCE (CCC)	2015
1	An Adaptive Linear Parameter Varying Fault Tolerant Control Scheme for Unmanned Surface Vehicle Steering Control	Liu Zhixiang; Zhang Youmin; Yuan Chi; Luo Jun	2015 34TH CHINESE CONTROL CONFERENCE (CCC)	2015
1	Fast Object Detection from Unmanned Surface Vehicles via Objectness and Saliency	Li, Chang; Cao, Zhiguo; Xiao, Yang; Fang, Zhiwen	2015 CHINESE AUTOMATION CONGRESS (CAC)	2015
1	Lagrangian Dynamic Modeling of Wave-driven Unmanned Surface Vehicle in Three Dimensions Based on the D-H Approach	Tian, Baoqiang; Yu, Jiancheng; Zhang, Aiqun	2015 IEEE INTERNATIONAL CONFERENCE ON CYBER TECHNOLOGY IN AUTOMATION, CONTROL, AND INTELLIGENT SYSTEMS (CYBER)	2015
4	Design and Motion Control of Autonomous Underwater Vehicle, Amogh	Upadhyay, V.; Gupta, S.; Dubey, A. C.; Rao, M. J.; Siddhartha, P.; Gupta, V.; George, S.; Bobba, R.; Sirikonda, R.; Maloo, A.; Idichandy, V. G.	2015 IEEE UNDERWATER TECHNOLOGY (UT)	2015
1	Adversarial Blocking Techniques for Autonomous Surface Vehicles using Model-Predictive Motion Goal Computation	Mullins, Galen E.; Gupta, Satyandra K.	2015 IEEE/RSJ INTERNATIONAL CONFERENCE ON INTELLIGENT ROBOTS AND SYSTEMS (IROS)	2015
1	Evaluation and comparison of navigation guidance and control systems for 2D surface path-following	Saggini, Eleonora; Zereik, Enrica; Bibuli, Marco; Ranieri, Andrea; Bruzzone, Gabriele; Caccia, Massimo; Riccomagno, Eva	ANNUAL REVIEWS IN CONTROL	2015
1	A Graphical Model for Rapid Obstacle Image-Map Estimation from Unmanned Surface Vehicles	Kristan, Matej; Pers, Janez; Sulic, Vildana; Kovacic, Stanislav	COMPUTER VISION - ACCV 2014, PT II	2015
4	COMPARISON OF DEPTH CONTROL FORM SURFACE AND BOTTOM SET POINT OF AN UNMANNED UNDERWATER REMOTELY OPERATED VEHICLE USING PID CONTROLLER	Aras, Mohd Shahrieel Mohd; Teck, Lim Wee; Azis, Fadilah Abdul; Nor, Arfah Syahida Mohd; Hasim, Norhaslinda	JURNAL TEKNOLOGI	2015
3	The Enigmatic Juridical Regime of Unmanned Maritime Systems	Giunta, Leonida	OCEANS 2015 - GENOVA	2015
1	Trajectory tracking algorithm for autonomous vehicles using adaptive reinforcement learning	De Paula, Mariano; Acosta, Gerardo G.	OCEANS 2015 - MTS/IEEE WASHINGTON	2015
2	Tracking and remote monitoring of an autonomous underwater vehicle using an unmanned surface vehicle in the Trondheim fjord	Norgren, Petter; Ludvigsen, Martin; Ingebretsen, Thomas; Hovstein, Vegard Evjen	OCEANS 2015 - MTS/IEEE WASHINGTON	2015
2	Real time detecting of harmful dinoflagellate Cochlodinium polykrikoides using unmanned surface vehicle in dynamic environments	Seo, Sung Mok; Chung, Wan Kyun; Cho, Eun Seob	JOURNAL OF ENVIRONMENTAL BIOLOGY	2014
4	ARTIFICIAL HAIR SENSORS: ELECTRO-MECHANICAL CHARACTERIZATION	Phillips, David M.; Slinker, Keith A.; Ray, Cody W.; Hagen, Benjamin J.; Baur, Jeffery W.; Dickinson, Benjamin T.; Reich, Gregory W.	PROCEEDINGS OF THE ASME CONFERENCE ON SMART MATERIALS ADAPTIVE STRUCTURES AND INTELLIGENT SYSTEMS, 2014, VOL 2	2014
1	A nonlinear controller for trajectory tracking of hovercraft robot	Herman, Przemyslaw; Kowalczyk, Wojciech	2014 22ND MEDITERRANEAN CONFERENCE ON CONTROL AND AUTOMATION (MED)	2014
1	Multi-objective based Course-keeping Controller Optimization of Unmanned Surface Vehicle	Xu Qingyang	2014 33RD CHINESE CONTROL CONFERENCE (CCC)	2014
1	Multi-targets Recognition for Surface Moving Platform Vision System Based on Combined Features	Ma, Zhongli; Wen, Jie; Hao, Liangliang; Wang, Xiang	2014 IEEE INTERNATIONAL CONFERENCE ON MECHATRONICS AND AUTOMATION (IEEE ICMA 2014)	2014
4	Motion planning in the belief space for compliant behaviour of a diver companion robot	Zereik, Enrica; Bibuli, Marco; Bruzzone, Gabriele; Gagliardi, Francesco; Bonsignorio, Fabio	2014 IEEE INTERNATIONAL CONFERENCE ON ROBOTICS AND BIOMIMETICS IEEE-ROBIO 2014	2014
1	Stereo vision-based Target Tracking System for an USV	Sinisterra, Armando J.; Dhanak, Manhar R.; von Ellenrieder, Karl	2014 OCEANS - ST. JOHN'S	2014
4	Visual Appearance-Based Unmanned Vehicle Sequential Localization Regular Paper	Liu, Wei; Zheng, Nanning; Xue, Jianru; Zhang, Xuetao; Yuan, Zejian	INTERNATIONAL JOURNAL OF ADVANCED ROBOTIC SYSTEMS	2013
4	NONLINEAR CONTROL OF AN UNMANNED AMPHIBIOUS VEHICLE	Alvarez, Jose; Bertaska, Ivan R.; von Ellenrieder, Karl	ASME 2013 DYNAMIC SYSTEMS AND CONTROL CONFERENCE, VOL. 3	2013
1	Online Path Planning Based on MILP for Unmanned Surface Vehicles	Leng, Jing; Liu, Jian; Xu, Hongli	2013 OCEANS - SAN DIEGO	2013
1	Guidance, Navigation, and Control of Unmanned Hovercraft	Kim, Kilsoo; Lee, Young-Ki; Oh, Sehwan; Moroniti, David; Mavris, Dimitri; Vachtsevanos, George J.; Papamarkos, Nikos; Georgoulas, George	2013 21ST MEDITERRANEAN CONFERENCE ON CONTROL AND AUTOMATION (MED)	2013
4	Image structural analysis in the tasks of automatic navigation of unmanned vehicles and inspection of Earth surface	Lutsiv, Vadim; Malyshev, Igor	ELECTRO-OPTICAL REMOTE SENSING, PHOTONIC TECHNOLOGIES, AND APPLICATIONS VII; AND MILITARY APPLICATIONS IN HYPERSPECTRAL IMAGING AND HIGH SPATIAL RESOLUTION SENSING	2013
1	A Method of Detecting Wave Grade Based on Visual Image Taken by USV	Liu Kangke; Wang Jianhua	ADVANCES IN ENERGY SCIENCE AND TECHNOLOGY, PTS 1-4	2013
2	An Autonomous Air-Sea Rescue System Using Particle Swarm Optimization	Rafferty, K. J.; McGookin, E. W.	2013 INTERNATIONAL CONFERENCE ON CONNECTED VEHICLES AND EXPO (ICCVE)	2013
1	Controller Design Challenges for Waterjet Propelled Unmanned Surface Vehicles with Uncertain Drag and Mass Properties	Klinger, Wilhelm B.; Bertaska, Ivan; Alvarez, Jose; von Ellenrieder, Karl D.	2013 OCEANS - SAN DIEGO	2013
1	A Feasibility Study on the Design, Development and Operation of an Automated Oceanic Wave Surface Glider Robot	Wang, Yao; Anvar, Amir M.; Anvar, Amir Parsa; Hu, Eric	20TH INTERNATIONAL CONGRESS ON MODELLING AND SIMULATION (MODSIM2013)	2013
1	Design and simulation analysis of flying trimaran USV	Muljowidodo, K.; Nugroho, Sapto Adi; Prayogo, Nico; Budiyono, Agus	INDIAN JOURNAL OF GEO-MARINE SCIENCES	2012
4	Aurelia aurita bio-inspired tilt sensor	Smith, Colin; Villanueva, Alex; Priya, Shashank	SMART MATERIALS AND STRUCTURES	2012
4	Heading Control of a Fixed Wing UAV Using Alternate Control Surfaces	Ahsan, Mansoor; Rafique, Hamza; Abbas, Zofishan	2012 15TH INTERNATIONAL MULTITOPIC CONFERENCE (INMIC)	2012
1	Using Neural-Evolutionary-Fuzzy Algorithm for Anti-collision System of Unmanned Surface Vehicle	Szymak, Piotr; Praczyk, Tomasz	2012 17TH INTERNATIONAL CONFERENCE ON METHODS AND MODELS IN AUTOMATION AND ROBOTICS (MMAR)	2012
1	Using Genetic Algorithms to Fix a Route for an Unmanned Surface Vehicle	Praczyk, Tomasz; Szymak, Piotr	2012 17TH INTERNATIONAL CONFERENCE ON METHODS AND MODELS IN AUTOMATION AND ROBOTICS (MMAR)	2012
4	1303 Unmanned Combat Air Vehicle Flowfield Simulations and Comparison with Experimental Data	Sherer, Scott E.; Visbal, Miguel R.; Gordnier, Raymond E.; Yilmaz, Turgut O.; Rockwell, Donald O.	JOURNAL OF AIRCRAFT	2011
2	Coordinated sea rescue system based on unmanned air vehicles and surface vessels	Fernandez Ramirez, Francisco; Sanchez Benitez, David; Besada Portas, Eva; Lopez Orozco, Jose A.	2011 IEEE - OCEANS SPAIN	2011
4	Spectral LADAR as a UGV Navigation Sensor	Powers, Michael A.; Davis, Christopher C.	LASER RADAR TECHNOLOGY AND APPLICATIONS XVI	2011
1	Visual-Based Navigation of an Autonomous Surface Vehicle	Tall, M. H.; Rynne, P. F.; Lorio, J. M.; von Ellenrieder, K. D.	MARINE TECHNOLOGY SOCIETY JOURNAL	2010
1	Full State-Feedback Stabilization of an Underactuated Unmanned Surface Vehicle	Liao, Yulei; Wan, Lei; Zhuang, Jiayuan	2ND IEEE INTERNATIONAL CONFERENCE ON ADVANCED COMPUTER CONTROL (ICACC 2010), VOL. 4	2010
4	Design and manufacture of the DEMON unmanned air vehicle demonstrator vehicle	Fielding, J. P.; Mills, A.; Smith, H.	PROCEEDINGS OF THE INSTITUTION OF MECHANICAL ENGINEERS PART G-JOURNAL OF AEROSPACE ENGINEERING	2010
2	Shallow Water Surveying Using Experimental Interferometric Synthetic Aperture Sonar	Silva, Sergio Rui; Cunha, Sergio; Matos, Anibal; Cruz, Nuno	MARINE TECHNOLOGY SOCIETY JOURNAL	2009
2	Combined GIS and ROV technologies improve characterization of water quality in Coastal Rivers of the Gulf of Mexico	Casper, A. F.; Steimle, E. T.; Hall, M. L.; Dixon, B.	OCEANS 2009, VOLS 1-3	2009
4	Land, Sea, and Air Unmanned Systems Research and Development at SPAWAR Systems Center Pacific	Nguyen, Hoa G.; Laird, Robin; Kogut, Greg; Andrews, John; Fletcher, Barbara; Webber, Todd; Arrieta, Rich; Everett, H. R.	UNMANNED SYSTEMS TECHNOLOGY XI	2009
4	Dynamical Response Analysis of Incautious Water entry of UUV Based on Exact Body Shape Approach	Wang, Yonghu; Shi, Xiuhua; Wang, Peng	2008 7TH WORLD CONGRESS ON INTELLIGENT CONTROL AND AUTOMATION, VOLS 1-23	2008
1	Comparison of low-cost GPS/INS sensors for autonomous vehicle applications	Elkaim, G. H.; Lizarraga, M.; Pedersen, L.	2008 IEEE/ION POSITION, LOCATION AND NAVIGATION SYMPOSIUM, VOLS 1-3	2008
4	NDT Detection and Quantification of Induced Defects on Composite Helicopter Rotor Blade and UAV Wing Sections	Findeis, Dirk; Gryzagoridis, Jasson; Musonda, Vincent	NINTH INTERNATIONAL SYMPOSIUM ON LASER METROLOGY, PTS 1 AND 2	2008
4	Mobility prediction for unmanned ground vehicles in uncertain environments	Kewlani, Gaurav; Iagnemma, Karl	UNMANNED SYSTEMS TECHNOLOGY X	2008
4	Visual odometry for velocity estimation of UGVs	Song, Xiaojing; Seneviratne, Lakmal D.; Althoefer, Kaspar; Song, Zibin; Zweiri, Yahya H.	2007 IEEE INTERNATIONAL CONFERENCE ON MECHATRONICS AND AUTOMATION, VOLS I-V, CONFERENCE PROCEEDINGS	2007
4	Magnetic gradiometer for underwater detection applications	Kumar, S.; Skvoretz, D. C.; Moeller, C. R.; Ebbert, M. J.; Perry, A. R.; Ostrom, R. K.; Tzouris, A.; Bennett, S. L.; Czipott, P. V.; Sulzberger, G.; Allen, G. I.; Bono, J.; Clem, T. R.	SENSORS, AND COMMAND, CONTROL, COMMUNICATIONS, AND INTELLIGENCE (C31)TECHNOLOGIES FOR HOMELAND SECURITY AND HOMELAND DEFENSE V	2006
4	A group filter algorithm for sea mine detection	Cobb, JT; An, M; Tolimieri, R	DETECTION AND REMEDIATION TECHNOLOGIES FOR MINES AND MINELIKE TARGETS X, PTS 1 AND 2	2005
4	Preliminary evaluation of the laser scalar gradiometer for buried minehunting	Clem, T. R.; Davis, P. S.; McDonald, R. J.; Overway, D. J.; Purpura, J. W.; Vaizer, L.; King, D.	OCEANS 2005, VOLS 1-3	2005
4	Real-Time Tracking Gradiometer for use in an autonomous underwater vehicle for buried minehunting	Kumar, S.; Skvoretz, D. C.; Moeller, C. R.; Ebbert, M. J.; Perry, A. R.; Ostrom, R. K.; Tzouris, A.; Bennett, S. L.; Czipott, P. V.	OCEANS 2005, VOLS 1-3	2005
4	Romeo-ARAMIS integration and sea trials	Caccia, M; Bono, R; Bruzzone, GA; Bruzzone, GI; Spirandelli, E; Veruggio, G	MARINE TECHNOLOGY SOCIETY JOURNAL	2002
4	Fuzzy depth control of an unmanned free-swimming submersible vehicle	Li, CS; Chen, YC	IEEE 5TH INTERNATIONAL CONFERENCE ON INTELLIGENT TRANSPORTATION SYSTEMS, PROCEEDINGS	2002
4	WetNet(TM) a mutli-client, marine communication network	Smith, S; Kolar, R; Varley, RF	OCEANS 2002 MTS/IEEE CONFERENCE & EXHIBITION, VOLS 1-4, CONFERENCE PROCEEDINGS	2002
4	An all weather millimetre wave imaging radar for UAVs	Britton, A; Joynson, D	AERONAUTICAL JOURNAL	2001
4	FDTD seismic simulation of moving battlefield targets	Anderson, TS; Ketcham, SA; Moran, ML; Greenfield, RJ	UNATTENDED GROUND SENSOR TECHNOLOGIES AND APPLICATIONS III	2001
1	An obstacle avoidance strategy for the wave glider based on the improved artificial potential field and collision prediction model	Wang, Daoyong; Wang, Peng; Zhang, Xiantao; Guo, Xiaoxian; Shu, Yaqing; Tian, Xinliang	OCEAN ENGINEERING	2020
1	The autonomous navigation and obstacle avoidance for USVs with ANOA deep reinforcement learning method	Wu, Xing; Chen, Haolei; Chen, Changgu; Zhong, Mingyu; Xie, Shaorong; Guo, Yike; Fujita, Hamido	KNOWLEDGE-BASED SYSTEMS	2020
2	Mapping Topobathymetry in a Shallow Tidal Environment Using Low-Cost Technology	Genchi, Sibila A.; Vitale, Alejandro J.; Perillo, Gerardo M. E.; Seitz, Carina; Delrieux, Claudio A.	REMOTE SENSING	2020
1	Trajectory Linearization-Based Adaptive PLOS Path Following Control for Unmanned Surface Vehicle with Unknown Dynamics and Rudder Saturation	Qiu, Bingbing; Wang, Guofeng; Fan, Yunsheng	APPLIED SCIENCES-BASEL	2020
1	Development of Broadband Underwater Radio Communication for Application in Unmanned Underwater Vehicles	Smolyaninov, Igor; Balzano, Quirino; Young, Dendy	JOURNAL OF MARINE SCIENCE AND ENGINEERING	2020
4	Linear surface gravity waves on current for a general inertial viewer	Kouskoulas, David M.; Toledo, Yaron	PHYSICS OF FLUIDS	2020
4	Adaptive disturbance rejection for course tracking of marine vessels under actuator constraint	Hu, Xin; Wei, Xinjiang; Han, Jian; Zhang, Qiang	ISA TRANSACTIONS	2020
2	The Autonomous Underwater Vehicle Integrated with the Unmanned Surface Vessel Mapping the Southern Ionian Sea. The Winning Technology Solution of the Shell Ocean Discovery XPRIZE	Zwolak, Karolina; Wigley, Rochelle; Bohan, Aileen; Zarayskaya, Yulia; Bazhenova, Evgenia; Dorshow, Wetherbee; Sumiyoshi, Masanao; Sattiabaruth, Seeboruth; Roperez, Jaya; Proctor, Alison; Wallace, Craig; Sade, Hadar; Ketter, Tomer; Simpson, Benjamin; Tinmouth, Neil; Falconer, Robin; Ryzhov, Ivan; Abou-Mahmoud, Mohamed Elsaied	REMOTE SENSING	2020
4	Station-Keeping Underwater Gliders Using a Predictive Ocean Circulation Model and Applications to SWOT Calibration and Validation	Clark, Evan B.; Branch, Andrew; Chien, Steve; Mirza, Faiz; Farrara, John D.; Chao, Yi; Fratantoni, David; Aragon, David; Schofield, Oscar; Flexas, Mar M.; Thompson, Andrew	IEEE JOURNAL OF OCEANIC ENGINEERING	2020
1	A restricted circle based position keeping strategy for the wave glider	Wang, Peng; Zhang, Xiantao; Wang, Daoyong; Guo, Xiaoxian; Lu, Wenyue; Tian, Xinliang	APPLIED OCEAN RESEARCH	2020
1	Doppler-based navigation for mobile protection system of strategic maritime facilities in GNSS jamming and spoofing conditions	Ziolkowski, Cezary; Kelner, Jan M.	IET RADAR SONAR AND NAVIGATION	2020
1	Broken lines path following algorithm for a water-jet propulsion USV with disturbance uncertainties	Zhao, Yujiao; Qi, Xin; Incecik, Atilla; Ma, Yong; Li, Zhixiong	OCEAN ENGINEERING	2020
1	The review unmanned surface vehicle path planning: Based on multi-modality constraint	Zhou, Chunhui; Gu, Shangding; Wen, Yuanqiao; Du, Zhe; Xiao, Changshi; Huang, Liang; Zhu, Man	OCEAN ENGINEERING	2020
4	Adaptive modeling of maritime autonomous surface ships with uncertainty using a weighted LS-SVR robust to outliers	Zhu, Man; Sun, Wuqiang; Hahn, Axel; Wen, Yuanqiao; Xiao, Changshi; Tao, Wei	OCEAN ENGINEERING	2020
1	A Novel Water-Shore-Line Detection Method for USV Autonomous Navigation	Zou, Xiong; Xiao, Changshi; Zhan, Wenqiang; Zhou, Chunhui; Xiu, Supu; Yuan, Haiwen	SENSORS	2020
4	Fast Planar Detection System Using a GPU-Based 3D Hough Transform for LiDAR Point Clouds	Tian, Yifei; Song, Wei; Chen, Long; Sung, Yunsick; Kwak, Jeonghoon; Sun, Su	APPLIED SCIENCES-BASEL	2020
1	Collision avoidance for an unmanned surface vehicle using deep reinforcement learning	Woo, Joohyun; Kim, Nakwan	OCEAN ENGINEERING	2020
4	Three-dimensional Visual Mapping of Underwater Ship Hull Surface Using Piecewise-planar SLAM	Hong, Seonghun; Kim, Jinwhan	INTERNATIONAL JOURNAL OF CONTROL AUTOMATION AND SYSTEMS	2020
1	Adaptive Non-singular Terminal Sliding Mode Control for an Unmanned Underwater Vehicle: Real-time Experiments	Rangel, Miguel Angel Garcia; Manzanilla, Adrian; Suarez, Angel Eduardo Zamora; Munoz, Filiberto; Salazar, Sergio; Lozano, Rogelio	INTERNATIONAL JOURNAL OF CONTROL AUTOMATION AND SYSTEMS	2020
4	Eye of the Storm Observing Hurricanes with a Small Unmanned Aircraft System	Cione, Joseph J.; Bryan, George H.; Dobosy, Ronald; Zhang, Jun A.; de Boer, Gijs; Aksoy, Altug; Wadler, Joshua B.; Kalina, Evan A.; Dahl, Brittany A.; Ryan, Kelly; Neuhaus, Jonathan; Dumas, Ed; Marks, Frank D.; Farber, Aaron M.; Hock, Terry; Chen, Xiaomin	BULLETIN OF THE AMERICAN METEOROLOGICAL SOCIETY	2020
1	Identification-based 3 DOF model of unmanned surface vehicle using support vector machines enhanced by cuckoo search algorithm	Xu, Peng-Fei; Cheng, Chen; Cheng, Hong-Xia; Shen, Ya-Lin; Ding, Yan-Xu	OCEAN ENGINEERING	2020
2	Sensors to Increase the Security of Underwater Communication Cables: A Review of Underwater Monitoring Sensors	Eleftherakis, Dimitrios; Vicen-Bueno, Raul	SENSORS	2020
1	Adaptive Semantic Segmentation for Unmanned Surface Vehicle Navigation	Zhan, Wenqiang; Xiao, Changshi; Wen, Yuanqiao; Zhou, Chunhui; Yuan, Haiwen; Xiu, Supu; Zou, Xiong; Xie, Cheng; Li, Qiliang	ELECTRONICS	2020
1	Adaptive Fuzzy Output Regulation for Unmanned Surface Vehicles with Prescribed Performance	Li, Shaobao; Ma, Tingting; Luo, Xiaoyuan; Yang, Zhenyu	INTERNATIONAL JOURNAL OF CONTROL AUTOMATION AND SYSTEMS	2020
4	Using Ship-Deployed High-Endurance Unmanned Aerial Vehicles for the Study of Ocean Surface and Atmospheric Boundary Layer Processes	Zappa, Christopher J.; Brown, Scott M.; Laxague, Nathan J. M.; Dhakal, Tejendra; Harris, Ryan A.; Farber, Aaron M.; Subramaniam, Ajit	FRONTIERS IN MARINE SCIENCE	2020
1	Underactuated Coupled Nonlinear Adaptive Control Synthesis Using U-Model for Multivariable Unmanned Marine Robotics	Hussain, Nur Afande Ali; Ali, Syed Saad Azhar; Ovinis, Mark; Arshad, Mohd Rizal; Al-Saggaf, Ubaid M.	IEEE ACCESS	2020
1	Model Identification and Trajectory Tracking Control for Vector Propulsion Unmanned Surface Vehicles	Sun, Xiaojie; Wang, Guofeng; Fan, Yunsheng	ELECTRONICS	2020
4	The Ocean-Going Autonomous Ship-Challenges and Threats	Felski, Andrzej; Zwolak, Karolina	JOURNAL OF MARINE SCIENCE AND ENGINEERING	2020
1	Stochastic Model Predictive Control for the Set Point Tracking of Unmanned Surface Vehicles	Tan, Yuan; Cai, Guangbin; Li, Bin; Teo, Kok Lay; Wang, Song	IEEE ACCESS	2020
1	AN AUTOMATIC COLLISION AVOIDANCE ALGORITHM FOR MULTIPLE MARINE SURFACE VEHICLES	Hedjar, Ramdane; Bounkhel, Messaoud	INTERNATIONAL JOURNAL OF APPLIED MATHEMATICS AND COMPUTER SCIENCE	2019
4	Adaptive multi-index collocation for uncertainty quantification and sensitivity analysis	Jakeman, John D.; Eldred, Michael S.; Geraci, Gianluca; Gorodetsky, Alex	INTERNATIONAL JOURNAL FOR NUMERICAL METHODS IN ENGINEERING	2020
2	Three-Dimensional Reconstruction of a Marine Floating Structure With an Unmanned Surface Vessel	Han, Jungwook; Kim, Jinwhan	IEEE JOURNAL OF OCEANIC ENGINEERING	2019
1	Finite-Time PLOS-Based Integral Sliding-Mode Adaptive Neural Path Following for Unmanned Surface Vessels With Unknown Dynamics and Disturbances	Yu, Yalei; Guo, Chen; Yu, Haomiao	IEEE TRANSACTIONS ON AUTOMATION SCIENCE AND ENGINEERING	2019
4	Development of an Inexpensive Decentralized Autonomous Aquatic Craft Swarm System for Ocean Exploration	Miao, Runlong; Pang, Shuo; Jiang, Dapeng	JOURNAL OF MARINE SCIENCE AND APPLICATION	2019
1	A novel GPS/RAVO/MEMS-INS smartphone-sensor-integrated method to enhance USV navigation systems during GPS outages	Mostafa, Mohamed Z.; Khater, Hatem A.; Rizk, Mohamed R.; Bahasan, Abdullah M.	MEASUREMENT SCIENCE AND TECHNOLOGY	2019
4	Investigation of hydrodynamic lift & drag on an autonomous winged submarine using computational fluid dynamics	Olmos, Sergio; de Lara, Jose; Carrasco, Pablo	OCEAN ENGINEERING	2019
3	Public-Private Partnerships to Advance Regional Ocean-Observing Capabilities: A Saildrone and NOAA-PMEL Case Study and Future Considerations to Expand to Global Scale Observing	Meinig, Christian; Burger, Eugene F.; Cohen, Nora; Cokelet, Edward D.; Cronin, Meghan F.; Cross, Jessica N.; de Halleux, Sebastien; Jenkins, Richard; Jessup, Andrew T.; Mordy, Calvin W.; Lawrence-Slavas, Noah; Sutton, Adrienne J.; Zhang, Dongxiao; Zhang, Chidong	FRONTIERS IN MARINE SCIENCE	2019
1	A Method of Path Planning on Safe Depth for Unmanned Surface Vehicles Based on Hydrodynamic Analysis	Liu, Shuai; Wang, Chenxu; Zhang, Anmin	APPLIED SCIENCES-BASEL	2019
4	Multi-Media and Multi-Band Based Adaptation Layer Techniques for Underwater Sensor Networks	Raj, Delphin K. M.; Yum, Sun-Ho; Ko, Eunbi; Shin, Soo-Young; Namgung, Jung-Il; Park, Soo-Hyun	APPLIED SCIENCES-BASEL	2019
1	Development and path planning of a novel unmanned surface vehicle system and its application to exploitation of Qarhan Salt Lake	Xue, Zhibin; Liu, Jincun; Wu, Zhengxing; Du, Sheng; Kong, Shihan; Yu, Junzhi	SCIENCE CHINA-INFORMATION SCIENCES	2019
1	Feedback motion planning of unmanned surface vehicles via random sequential composition	Ege, Emre; Ankarali, Mustafa Mert	TRANSACTIONS OF THE INSTITUTE OF MEASUREMENT AND CONTROL	2019
1	Collision avoidance planning for unmanned surface vehicle based on eccentric expansion	Song, Lifei; Chen, Zhuo; Dong, Zaopeng; Xiang, Zuquan; Mao, Yunsheng; Su, Yiran; Hu, Kai	INTERNATIONAL JOURNAL OF ADVANCED ROBOTIC SYSTEMS	2019
2	Design and Experiment for an Offshore Nuclear Radiation Emergent Observation System based on an Unmanned Surface Vehicle	Jin, Jincai; Zhang, Jie; Liu, Deqing; Shao, Feng; Wang, Dong; Shi, Junnan; Li, Fangxu	JOURNAL OF COASTAL RESEARCH	2019
4	MallARD: An Autonomous Aquatic Surface Vehicle for Inspection and Monitoring of Wet Nuclear Storage Facilities	Groves, Keir; West, Andrew; Gornicki, Konrad; Watson, Simon; Carrasco, Joaquin; Lennox, Barry	ROBOTICS	2019
1	A Path-Planning Strategy for Unmanned Surface Vehicles Based on an Adaptive Hybrid Dynamic Stepsize and Target Attractive Force-RRT Algorithm	Zhang, Zhen; Wu, Defeng; Gu, Jiadong; Li, Fusheng	JOURNAL OF MARINE SCIENCE AND ENGINEERING	2019
4	Overcast versus clear-sky remote sensing: comparing surface reflectance estimatesP	Shoshany, Maxim; Spond, Hanan; Bar, Doron E.	INTERNATIONAL JOURNAL OF REMOTE SENSING	2019
4	A novel rapid point-cloud surface reconstruction algorithm for laser imaging radar	Wang, Wendong	MULTIMEDIA TOOLS AND APPLICATIONS	2019
1	Efficient LiDAR-Based Object Segmentation and Mapping for Maritime Environments	Thompson, David; Coyle, Eric; Brown, Jeremy	IEEE JOURNAL OF OCEANIC ENGINEERING	2019
1	Adaptive heading control of unmanned wave glider with heading information fusion	Wang Leifeng; Li Ye; Liao Yulei; Pan Kaiwen; Zhang Weixin	CONTROL ENGINEERING PRACTICE	2019
2	First Rocketsonde Launched from an Unmanned Semi-submersible Vehicle	Chen, Hongbin; Li, Jun; Xuan, Yuejian; Huang, Xiaosong; Zhu, Weifeng; Zhu, Keping; Shao, Wenzheng	ADVANCES IN ATMOSPHERIC SCIENCES	2019
1	A Multi-Agent Based Intelligent Training System for Unmanned Surface Vehicles	Han, Wei; Zhang, Bing; Wang, Qianyi; Luo, Jun; Ran, Weizhi; Xu, Yang	APPLIED SCIENCES-BASEL	2019
1	Fuzzy Categorical Deep Reinforcement Learning of a Defensive Game for an Unmanned Surface Vessel	Cheng, Yin; Sun, Zhijian; Huang, Yuexin; Zhang, Weidong	INTERNATIONAL JOURNAL OF FUZZY SYSTEMS	2019
1	A 3D Object Detection Based on Multi-Modality Sensors of USV	Wu, Yingying; Qin, Huacheng; Liu, Tao; Liu, Hao; Wei, Zhiqiang	APPLIED SCIENCES-BASEL	2019
1	A gain-scheduling control strategy and short-term path optimization with genetic algorithm for autonomous navigation of a sailboat robot	dos Santos, Davi Henrique; Garcia Goncalves, Luiz Marcos	INTERNATIONAL JOURNAL OF ADVANCED ROBOTIC SYSTEMS	2019
4	Performance Analysis of an Unmanned Under Water Vehicle Using CFD Technique	Al Noman, Abdullah; Tusar, Mehedi Hasan; Uddin, Kazi Zahir; Uddin, Faruk; Paul, Shanak; Rahman, M. M.	8TH BSME INTERNATIONAL CONFERENCE ON THERMAL ENGINEERING	2019
1	Automatic target tracking with time-delayed measurements for unmanned surface vehicles	Han, Jungwook; Son, Nam-Sun; Kim, Jinwhan	SPIE FUTURE SENSING TECHNOLOGIES	2019
1	Filtered Extended State Observer Based Line-of-Sight Guidance for Path Following of Unmanned Surface Vehicles With Unknown Dynamics and Disturbances	Li, Mingcong; Guo, Chen; Yu, Haomiao	IEEE ACCESS	2019
2	Three-Dimensional Visual Mapping of Underwater Ship Hull Surface using View-based Piecewise-Planar Measurements	Hong, Seonghun; Kim, Jinwhan	IFAC PAPERSONLINE	2019
4	Multi-vehicle Guidance, Navigation and Control towards Autonomous Ship Maneuvering in Confined Waters	Kurowski, Martin; Roy, Sylvain; Gehrt, Jan-Joeran; Damerius, Robert; Bueskens, Christof; Abel, Dirk; Jeinsch, Torsten	2019 18TH EUROPEAN CONTROL CONFERENCE (ECC)	2019
1	Motion planning for USVs with communication guarantees: an experimental setup	Hervagault, Yoann; Prodan, Ionela; Lefevre, Laurent	2019 18TH EUROPEAN CONTROL CONFERENCE (ECC)	2019
4	Wheel-surface model parameters estimation: sand humidity influence on traction effort of all-terrain unmanned vehicle	Czapla, Tomasz; Fice, Marcin; Niestroj, Roman	LATIN AMERICAN JOURNAL OF SOLIDS AND STRUCTURES	2019
1	ROBUST COURSE CONTROLLER BASED TRAJECTORY LINEARIZATION CONTROL FOR UNMANNED SURFACE VEHICLE WITH INPUT SATURATION	Qiu, Bingbing; Wang, Guofeng; Fan, Yunsheng; Mu, Dongdong; Sun, Xiaojie	MECHATRONIC SYSTEMS AND CONTROL	2019
4	Navigation and Control of Underwater Tracked Vehicle Using Ultrashort Baseline and Ring Laser Gyro Sensors	Ji, Dae-Hyeong; Choi, Hyeung-Sik; Mai The Vu; Ngoc-Duc Nguyen; Kim, Seo-Kang	SENSORS AND MATERIALS	2019
1	Model-based path planning and obstacle avoidance architecture for a twin jet Unmanned Surface Vessel	Villa, Jose; Aaltonen, Jussi; Koskinen, Kari T.	2019 THIRD IEEE INTERNATIONAL CONFERENCE ON ROBOTIC COMPUTING (IRC 2019)	2019
4	Intelligent Pavement Damage Monitoring Research in China	Zhang, Bing; Liu, Xianlin	IEEE ACCESS	2019
4	Conceptual Design of Small ROV for Sky to Water System	Watanabe, Keisuke; Utsunomiya, Koushi; Harada, Kazumasa; Nakajima, Shuhei	ICAROB 2019: PROCEEDINGS OF THE 2019 INTERNATIONAL CONFERENCE ON ARTIFICIAL LIFE AND ROBOTICS	2019
2	Monitoring of small and medium-sized water bodies using manned and unmanned surface vehicles - results of the RiverView (R)-project	Kutschera, Gesa; Blankenbach, Jorg; Blut, Christoph; Bolle, Friedrich-Wilhelm; Effkemann, Christoph; Gahlaut, Shakti; Hein, Nicole; Jagow, Marie-Luise; Schuttrumpf, Holger; Schwermann, Raimund; Tabatabaei, Sina; Woffler, Theide	HYDROLOGIE UND WASSERBEWIRTSCHAFTUNG	2018
1	Toward Resilience as a Tradable Parameter During Conceptual Trade Studies	Nuss, Andrew J.; Blackburn, Timothy D.; Garstenauer, Andreas	IEEE SYSTEMS JOURNAL	2018
4	Performance analysis of fixed wing space drones in different solar system bodies	Hassanalian, M.; Rice, D.; Johnstone, S.; Abdelkefi, A.	ACTA ASTRONAUTICA	2018
4	Unconventional control solutions for small fixed wing unmanned aircraft	Panta, A.; Mohamed, A.; Marino, M.; Watkins, S.; Fisher, A.	PROGRESS IN AEROSPACE SCIENCES	2018
4	Frequency Sensitivity and Mode Characteristics of Body Structure for a Piezoelectric-Based UUV	Li, Chong	APPLIED SCIENCES-BASEL	2018
1	A utilizing efficiency estimation method for wave-driven unmanned surface vehicle	Liu, Peng; Su, Yumin; Liu, Fushun; Liu, Yebao; Zhang, Jianhua; Huang, Shuling	OCEAN ENGINEERING	2018
4	Conceptual Design of a Reusable Unmanned Space Vehicle Using Multidisciplinary Optimization	Jung, Jongho; Yang, Hyungak; Kim, Kyuhong; Yee, Kwanjung; You, Kangkuk; Park, Kitae; Jeong, Shinkyu	INTERNATIONAL JOURNAL OF AERONAUTICAL AND SPACE SCIENCES	2018
4	Cooperative communication framework design for the unmanned aerial vehicles-unmanned surface vehicles formation	Ma, Yong; Zhao, Yujiao; Qi, Xin; Zheng, Yuanzhou; Gan, Runze	ADVANCES IN MECHANICAL ENGINEERING	2018
1	Adaptive Non-Strict Trajectory Tracking Control Scheme for a Fully Actuated Unmanned Surface Vehicle	Wang, Jian; Liu, Jing-yang; Yi, Hong; Wu, Nai-long	APPLIED SCIENCES-BASEL	2018
1	Safety engineering of computational cognitive architectures within safety-critical systems	Dreany, Harry H.; Roncace, Robert; Young, Paul	SAFETY SCIENCE	2018
1	Motion Control Algorithm for Path Following and Trajectory Tracking for Unmanned Surface Vehicle: A Review Paper	Shamsuddin, Putri Nur Farhanah Bt Mohd; bin Mansor, Muhamad Arifpin	2018 3RD INTERNATIONAL CONFERENCE ON CONTROL, ROBOTICS AND CYBERNETICS (CRC)	2018
4	Autonomous Vessel with an Air Look	Koszelew, Jolanta; Wolejsza, Piotr; Oldziej, Daniel	2018 BALTIC GEODETIC CONGRESS (BGC-GEOMATICS 2018)	2018
1	Object Detection Based on Saliency and Sea-Sky Line for USV Vision	Shi, Junnan; Jin, Jiucai; Zhang, Jie	PROCEEDINGS OF 2018 IEEE 4TH INFORMATION TECHNOLOGY AND MECHATRONICS ENGINEERING CONFERENCE (ITOEC 2018)	2018
4	Unmanned Ship Path Planning Based on RRT	Chen, Xinjia; Liu, Yanxia; Hong, Xiaobin; Wei, Xinyong; Huang, Yesheng	INTELLIGENT COMPUTING THEORIES AND APPLICATION, PT I	2018
4	Survey on Short-Term Technology Developments and Readiness Levels for Autonomous Shipping	van Cappelle, Laurien E.; Chen, Linying; Negenborn, Rudy R.	COMPUTATIONAL LOGISTICS (ICCL 2018)	2018
1	HorizonNet for visual terrain navigation	Grelsson, Bertil; Robinson, Andreas; Felsberg, Michael; Khan, Fahad Shahbaz	2018 IEEE THIRD INTERNATIONAL CONFERENCE ON IMAGE PROCESSING, APPLICATIONS AND SYSTEMS (IPAS)	2018
2	Fast and ultra-wide area bathymetric survey system without support vessel	Ohki, Takeshi; Nakatani, Takeshi; Nishida, Yuya; Thornton, Blair	2018 OCEANS - MTS/IEEE KOBE TECHNO-OCEANS (OTO)	2018
1	Hydrodynamics of Advanced-hull Surface Vehicles	Prasad, Bijoy; Dhanak, Manhar	OCEANS 2018 MTS/IEEE CHARLESTON	2018
1	A Review on Collaborative Planning of Multiple Unmanned Surface Vehicles	Liu, Guanqun; Wu, Junwei; Wen, Naifeng; Zhang, Rubo	2018 CHINESE AUTOMATION CONGRESS (CAC)	2018
2	Localization of an Acoustic Fish-Tag using the Time-of-Arrival Measurements: Preliminary results using eXogenous Kalman Filter	Jain, R. Praveen; Aguiar, A. Pedro; de Sousa, Joao Borges; Zolich, Artur; Johansen, Tor Arne; Alfredsen, Jo Arve; Erstorp, Elias; Kuttenkeuler, Jakob	2018 IEEE/RSJ INTERNATIONAL CONFERENCE ON INTELLIGENT ROBOTS AND SYSTEMS (IROS)	2018
2	Implementation of an Unmanned Surface Vehicle for Environmental Monitoring Applications	Paez, J.; Villa, J. L.; Cabrera, J.; Yime, E.	2018 IEEE 2ND COLOMBIAN CONFERENCE ON ROBOTICS AND AUTOMATION (CCRA)	2018
4	Online Update Siamese Network for Unmanned Surface Vehicle Tracking	Gong, Kaicheng; Cao, Zhiguo; Xiao, Yang; Fang, Zhiwen	INTELLIGENT ROBOTICS AND APPLICATIONS (ICIRA 2018), PT II	2018
1	Adaptive Tracking Control of Underactuated USV Based on Back-stepping and RBF Neural Network	Li, Yanzhe; Pan, Feng; Xing, Yao	2018 NINTH INTERNATIONAL CONFERENCE ON INTELLIGENT CONTROL AND INFORMATION PROCESSING (ICICIP)	2018
4	Evaluation of High Precision Localization Approach for a Fleet of Unmanned Deep Ocean Vehicles	Devassykutty, Edwin; Brink, Gunnar	ISCSIC'18: PROCEEDINGS OF THE 2ND INTERNATIONAL SYMPOSIUM ON COMPUTER SCIENCE AND INTELLIGENT CONTROL	2018
1	Effective detection by using visible and infrared mages of targets for Unmanned Surface Vehicles	Dai, Xuefeng; Zhao, Jianqi; Li, Dahui	AUTOMATIKA	2018
4	Development of a wall-climbing drone with a rotary arm for climbing various-shaped surfaces	Myeong, Wancheol; Song, Seungwon; Myung, Hyun	2018 15TH INTERNATIONAL CONFERENCE ON UBIQUITOUS ROBOTS (UR)	2018
1	Adaptive Online Constructive Fuzzy Tracking Control for Unmanned Surface Vessel With Unknown Time-Varying Uncertainties	Wang, Shasha; Fu, Mingyu; Wang, Yuanhui; Tuo, Yulong; Ren, Hongliang	IEEE ACCESS	2018
4	Low-resolution Ship Detection from High-altitude Aerial Images	Qi, Shengxiang; Wu, Jianmin; Zhou, Qing; Kang, Minyang	MIPPR 2017: AUTOMATIC TARGET RECOGNITION AND NAVIGATION	2018
1	Application of Improved Genetic Algorithm to Unmanned Surface Vehicle Path Planning	Long, Yang; Su, Yixin; Zhang, Huajun; Li, Ming	PROCEEDINGS OF 2018 IEEE 7TH DATA DRIVEN CONTROL AND LEARNING SYSTEMS CONFERENCE (DDCLS)	2018
1	SPAD array based TOF SoC design for unmanned vehicle	Pan, An; Xu, Yuan; Xie, Gang; Huang, Zhiyu; Zheng, Yanghao; Shi, Weiwei	YOUNG SCIENTISTS FORUM 2017	2018
1	A Test and Evaluation Framework for Unmanned Surface Vehicle	Kong, Weiwei; Feng, Weiqiang; Zheng, Yi; Hu, Tianjiang	PROCEEDINGS OF 2018 IEEE 7TH DATA DRIVEN CONTROL AND LEARNING SYSTEMS CONFERENCE (DDCLS)	2018
1	Asymmetric Steering Hydrodynamics Identification of a Differential Drive Unmanned Surface Vessel	Peeters, G.; Boonen, R.; Vanierschot, M.; DeFilippo, M.; Robinette, P.; Slaets, P.	IFAC PAPERSONLINE	2018
1	Imaging through haze using multispectral polarization imaging method	El Ketara, M.; Breugnot, S.	POLARIZATION: MEASUREMENT, ANALYSIS, AND REMOTE SENSING XIII	2018
4	Touchdown Remaining Lift on the Wings and Dynamic Vertical Force Transmitted to the Runway	De Luca, Mario; Dell'Acqua, Gianluca	PERIODICA POLYTECHNICA-CIVIL ENGINEERING	2018
1	Robust obstacle detection for Unmanned Surface Vehicles	Qin, Yueming; Zhang, Xiuzhi	MIPPR 2017: REMOTE SENSING IMAGE PROCESSING, GEOGRAPHIC INFORMATION SYSTEMS, AND OTHER APPLICATIONS	2018
1	Dynamic Surface Adaptive Robust Control of Unmanned Marine Vehicles with Disturbance Observer	Zhang, Pengchao	JOURNAL OF ROBOTICS	2018
1	Speed and Heading Control of an Unmanned Surface Vehicle Based on State Error PCH Principle	Lv, Chengxing; Yu, Haisheng; Hua, Zhili; Li, Lei; Chi, Jieru	MATHEMATICAL PROBLEMS IN ENGINEERING	2018
1	A Ground Control Station for Collaborative Unmanned Surface Vehicles	Bonache Seco, J. A.; Dormido Canto, J.; Montalvo Martinez, M.; Lopez-Orozco, J. A.; Besada Portas, E.; de la Cruz Garcia, J. M.	REVISTA IBEROAMERICANA DE AUTOMATICA E INFORMATICA INDUSTRIAL	2018
4	Use of Multi-Spectral High Repetition Rate LED Systems for High Bandwidth Underwater Optical Communications, and Communications to Surface and Aerial Systems	McGillivary, Philip A.; Chirayath, Ved; Baghdady, Joshua	2018 FOURTH UNDERWATER COMMUNICATIONS AND NETWORKING CONFERENCE (UCOMMS)	2018
1	Increasing the operational safety of Autonomous Underwater Vehicles using the JANUS communication standard	Ferreira, Fausto; Petroccia, Roberto; Alves, Joao	2018 IEEE/OES AUTONOMOUS UNDERWATER VEHICLE WORKSHOP (AUV)	2018
4	A Comparative Study of Two Approaches for UAV Emergency Landing Site Surface Type Estimation	Ayhan, Bulent; Kwan, Chiman	IECON 2018 - 44TH ANNUAL CONFERENCE OF THE IEEE INDUSTRIAL ELECTRONICS SOCIETY	2018
4	Developing and Evolving Unmanned Surface Vessels	Eudeline, Guillaume	SEA TECHNOLOGY	2017
2	Naval robots and rescue	Sparrow, Robert; McLaughlin, Rob; Howard, Mark	INTERNATIONAL REVIEW OF THE RED CROSS	2017
1	Dynamic Analysis and Motion Control of an Underactuated Unmanned Surface Vehicle (WL-II)	Wu, Ying; Yang, Shengqiang; Li, Wenhui; Liu, Daliang; Hou, Kang	MARINE TECHNOLOGY SOCIETY JOURNAL	2017
1	COMPARISON OF FUZZY SYSTEM WITH NEURAL AGGREGATION FSNA WITH CLASSICAL TSK FUZZY SYSTEM IN ANTI-COLLISION PROBLEM OF USV	Szymak, Piotr	POLISH MARITIME RESEARCH	2017
1	Egalitarian versus prioritarian approach in multiple task motion planning for nonholonomic systems	Ratajczak, Adam	NONLINEAR DYNAMICS	2017
4	Tire Force Estimation of Unmanned Ground Vehicles on Off-Road Terrains for Navigation Decisions	Wilson, Graeme Neff; Ramirez-Serrano, Alejandro; Sun, Qiao	2017 IEEE/RSJ INTERNATIONAL CONFERENCE ON INTELLIGENT ROBOTS AND SYSTEMS (IROS)	2017
4	The Combat of Unmanned Surface Vehicles Based on Wolves Attack	Pu, Juan; Wu, Xing; Guo, Yike; Xie, Shaorong; Pu, Huayan; Peng, Yan	NEW TRENDS IN INTELLIGENT SOFTWARE METHODOLOGIES, TOOLS AND TECHNIQUES	2017
1	The Unmanned Surface Vehicle Course Tracking Control with Input Saturation	Bai, Yiming; Zhao, Yongsheng; Fan, Yunsheng	PROCEEDINGS OF THE 36TH CHINESE CONTROL CONFERENCE (CCC 2017)	2017
2	CARACaS multi-agent maritime autonomy for unmanned surface vehicles in the Swarm II harbor patrol demonstration	Wolf, Michael T.; Rahmani, Amir; de la Croix, Jean-Pierre; Woodward, Gail; Vander Hook, Joshua; Brown, David; Schaffer, Steve; Lim, Christopher; Bailey, Philip; Tepsuporn, Scott; Pomerantz, Marc; Viet Nguyen; Sorice, Cristina; Sandoval, Michael	UNMANNED SYSTEMS TECHNOLOGY XIX	2017
2	Polish USV 'EDREDON' and non-European USV: a comparative sketch	Kalinowski, Arkadiusz; Malecki, Jozef	JOURNAL OF MARINE ENGINEERING AND TECHNOLOGY	2017
1	Disturbance Observer-based Trajectory Tracking Control of Unmanned Surface Vehicles with Unknown Disturbances and Input Saturation	Gao, Ying; Wang, Ning; Zheng, Zhongjiu	PROCEEDINGS OF THE 36TH CHINESE CONTROL CONFERENCE (CCC 2017)	2017
1	Leader-Follower Formation Control of Fully Actuated USVs With Prescribed Performance and Collision Avoidance	Dai, Shi-Lu; He, Shude; Luo, Fei; Wang, Ning	PROCEEDINGS OF THE 36TH CHINESE CONTROL CONFERENCE (CCC 2017)	2017
1	USING SITUATIONAL AWARENESS FOR ADAPTIVE DECISION MAKING IN AGENT-BASED SIMULATION	Topcu, Okan	2017 WINTER SIMULATION CONFERENCE (WSC)	2017
1	Two-layer Model Predictive Formation Control Of Unmanned Surface Vehicle	Fan, Zhenyuan; Li, Huiping	2017 CHINESE AUTOMATION CONGRESS (CAC)	2017
1	Experimental Variable Structure Trajectory Tracking Control of a Surface Vessel with a Motion Capture System	Castro Rosario, Rafael Vida; Cunha, Jose Paulo V. S.	IECON 2017 - 43RD ANNUAL CONFERENCE OF THE IEEE INDUSTRIAL ELECTRONICS SOCIETY	2017
1	Development of the Structural Diagram of the Radioelectronic Part of the Remote Control System by the Unmanned Vessel	Mickhayluck, Yuri P.; Afonin, Igor L.; Schekaturin, Andrey A.; Golovin, Vladislav V.; Iskiv, Vladimir M.; Redkina, Elena A.; Snegur, Dmitriy A.	2017 RADIATION AND SCATTERING OF ELECTROMAGNETIC WAVES (RSEMW)	2017
4	Cooperative Navigation and Control for Surface-Underwater Autonomous Marine Vehicles	Hu, Changqing; Fu, Li; Yang, Yiyong	PROCEEDINGS OF 2017 IEEE 2ND INFORMATION TECHNOLOGY, NETWORKING, ELECTRONIC AND AUTOMATION CONTROL CONFERENCE (ITNEC)	2017
4	Online Detection of Occluded Plant Stalks For Manipulation	Jenkins, Merritt; Kantor, George	2017 IEEE/RSJ INTERNATIONAL CONFERENCE ON INTELLIGENT ROBOTS AND SYSTEMS (IROS)	2017
1	An Approach for System Identification in Unmanned Surface Vehicles	Erunsal, Izzet Kagan; Ahiska, Kenan; Kumru, Murat; Leblebicioglu, Mehmet Kemal	2017 17TH INTERNATIONAL CONFERENCE ON CONTROL, AUTOMATION AND SYSTEMS (ICCAS)	2017
4	Design and Development of a Semi-Autonomous Stair Climbing Robotic Platform For Rough Terrains	Masood, Muhammad Umar; Sami, Muhammad Ahsan; Sohail, Haris; Mujtaba, Muhammad; Siddique, Muhammad Abubakar; Akram, Hashir; Rashid, Nasir; Tiwana, Mohsin I.; Iqbal, Javaid	2017 17TH INTERNATIONAL CONFERENCE ON CONTROL, AUTOMATION AND SYSTEMS (ICCAS)	2017
1	Virtual Bubble Filtering based on Heading Angle and Velocity for Unmanned Surface Vehicle (USV)	Weon, Ihn-Sik; Lee, Soon-Geul; Ryu, Jae-Kwan	2017 17TH INTERNATIONAL CONFERENCE ON CONTROL, AUTOMATION AND SYSTEMS (ICCAS)	2017
2	Modelling and Control of a Flexible Floating Boom: First Approach	Gapingsi, G. E.; Korbas, R.; Santos, M.	IFAC PAPERSONLINE	2017
4	Single-Epoch Ambiguity Resolution for Urban Ultra-Short Baseline Attitude Determination Using Low-Cost GNSS Receivers	Li, Wenyi; Cui, Xiaowei; Zhao, Sihao; Lu, Mingquan	PROCEEDINGS OF THE 30TH INTERNATIONAL TECHNICAL MEETING OF THE SATELLITE DIVISION OF THE INSTITUTE OF NAVIGATION (ION GNSS+ 2017)	2017
4	Micrometeoroid/Orbital Debris (MMOD) Impact Detection and Location Using Fiber Optic Bragg Grating Sensing Technology	Rickman, Steven L.; Richards, W. Lance; Christiansen, Eric L.; Piazza, Anthony; Pena, Francisco; Parker, Allen R.	STRUCTURAL HEALTH MONITORING - FROM SENSING TO DIAGNOSIS AND PROGNOSIS	2017
1	Research of obstacle recognition method for USV based on laser radar	Wang, Shuwu; Wu, Chao; Xie, Lei; Xu, Kun; Ma, Feng	2017 4TH INTERNATIONAL CONFERENCE ON TRANSPORTATION INFORMATION AND SAFETY (ICTIS)	2017
1	Set-Membership Filtering Approach for Path Tracking of an Unmanned Surface Vessel System	Zhang, Yilian; Yang, Fuwen; Wang, Jianhua; Chen, Jianmin; Zhu, Jin	2017 AUSTRALIAN AND NEW ZEALAND CONTROL CONFERENCE (ANZCC)	2017
2	Deep Learning of Submerged Body Images from 2D Sonar Sensor based on Convolutional Neural Network	Lee, Sejin	2017 IEEE UNDERWATER TECHNOLOGY (UT)	2017
1	Evaluation of Interface Modality for Control of Multiple Unmanned Vehicles	Calhoun, Gloria L.; Ruff, Heath A.; Behymer, Kyle J.; Rothwell, Clayton D.	ENGINEERING PSYCHOLOGY AND COGNITIVE ERGONOMICS: COGNITION AND DESIGN, EPCE 2017, PT II	2017
1	Sailing Control of a Moored USV without Thruster in Running Water	Arisumi, Hitoshi; Kato, Shin	OCEANS 2017 - ANCHORAGE	2017
4	ENHANCING THE STABILITY OF UNMANNED GROUND SPORT UTILITY VEHICLES THROUGH COORDINATED CONTROL UNDER MU-SPLIT AND GUST OF WIND	Yakub, Fitri; Mori, Yasuchika	JOURNAL OF ENGINEERING SCIENCE AND TECHNOLOGY	2016
1	Robust control for horizontal plane motions of autonomous underwater vehicles	Kamarlouei, Mojtaba; Ghassemi, Hassan	JOURNAL OF THE BRAZILIAN SOCIETY OF MECHANICAL SCIENCES AND ENGINEERING	2016
1	An AIS-Based Site Planning Method to Help Minimize Collision Risk during Marine Autonomous Surface Craft Deployments	Filimon, Michael A.; Codiga, Daniel L.	JOURNAL OF ATMOSPHERIC AND OCEANIC TECHNOLOGY	2016
4	The effects of tectonic deformation and sediment allocation on shelf habitats and megabenthic distribution and diversity in southern California	Switzer, Ryan D.; Parnell, P. Ed; Leichter, James L.; Driscoll, Neal W.	ESTUARINE COASTAL AND SHELF SCIENCE	2016
2	Tilt Compensated Mechanical Measurement Mechanism for Very Shallow Water USV Bathymetry	Sahalan, M. I.; Idris, M. H. Mat; Abidin, Z. Z.; Kamarudin, M. A. A. Che	2016 IEEE 6TH INTERNATIONAL CONFERENCE ON UNDERWATER SYSTEM TECHNOLOGY: THEORY AND APPLICATIONS	2016
4	Speech Semantic Recognition: A Control Mechanism For Assistive Robot	Mohamad, Siti Nur Ateeqa; Jamaludin, Ahmad Ammar; Isa, Khalid	2016 IEEE 6TH INTERNATIONAL CONFERENCE ON UNDERWATER SYSTEM TECHNOLOGY: THEORY AND APPLICATIONS	2016
4	Real-time Terrain Estimation Based on Multi-scale Radial Basis Function for Unmanned Ground Vehicle	Yang, Yi; Wang, Zhili; Li, Xinghe; Fu, Mengyin	2016 IEEE INTERNATIONAL CONFERENCE ON INFORMATION AND AUTOMATION (ICIA)	2016
1 and 2	Rapid Environmental Picture Atlantic exercise 2015: a field report	de Sousa, Joao Borges; Rajan, Kanna; Pereira, Joao; Johansson, Tor Arne; Pinto, Jose; Alves, Joao; Lourenco, Paulo Claro; Alves, Joao; Galocha, Joao Madaleno; Pelekanakis, Konstantinos; Fontes, Jorge; Munafo, Andrea; Silva, Monica; Petroccia, Roberto; Silva, Marina Carreiro; Incze, Michael	OCEANS 2016 MTS/IEEE MONTEREY	2016
2	Unmanned Vehicles for Anti-Submarine Warfare	Fahey, Steven; Luqi	OCEANS 2016 MTS/IEEE MONTEREY	2016
1	Characterizing the Critical Parameters for Docking Unmanned Underwater Vehicles	Martin, Stephen; Fletcher, Barbara; Flores, Geno; Jones, Anthony; Anna Nguyen; Caruso, Nicholas; Brown, M. Hunter	OCEANS 2016 MTS/IEEE MONTEREY	2016
1	Aspects of a Reliable Autonomous Navigation and Guidance System for an Unmanned Surface Vehicle	Song, Rui; Liu, Yuanchang; Liu, Wenwen; Bucknall, Richard	OCEANS 2016 MTS/IEEE MONTEREY	2016
4	Near real-time improved UUV positioning through channel estimation - The Unscented Kalman Filter approach	Vio, Renato P.; Cristi, Roberto; Smith, Kevin B.	OCEANS 2016 MTS/IEEE MONTEREY	2016
1	Modelling and Control of ASV acting as communication node for deep-sea applications	Kurowski, Martin; Rentzow, Erik; Ritz, Sebastian; Lampe, Bernhard; Jeinsch, Torsten	IFAC PAPERSONLINE	2016
1	Hierarchical RANSAC for Accurate Horizon Detection	Mou, Xiaozheng; Shin, Bok-Suk; Wang, Han	2016 24TH MEDITERRANEAN CONFERENCE ON CONTROL AND AUTOMATION (MED)	2016
1	Adaptive Fuzzy Trajectory Tracking Control of Unmanned Surface Vehicles with Unknown Dynamics	Feng, Ke; Wang, Ning; Liu, Dan; Er, Meng Joo	IEEE ICCSS 2016 - 2016 3RD INTERNATIONAL CONFERENCE ON INFORMATIVE AND CYBERNETICS FOR COMPUTATIONAL SOCIAL SYSTEMS (ICCSS)	2016
2	OVERVIEW OF SECURITY PLAN FOR OFFSHORE FLOATING NUCLEAR PLANT	Kindfuller, Vincent; Todreas, Neil; Buongiorno, Jacopo; Golay, Michael; Birch, Arthur; Isdanovich, Thomas; Thomas, Ron; Stevens, Harvey	PROCEEDINGS OF THE 24TH INTERNATIONAL CONFERENCE ON NUCLEAR ENGINEERING, 2016, VOL 5	2016
4	Relative Motion Modeling and Control for Autonomus UAV Carrier Landing	Zhu, Ming; Jin, Zhenghao; Zheng, Zewei; Sun, Liang	PROCEEDINGS OF THE 28TH CHINESE CONTROL AND DECISION CONFERENCE (2016 CCDC)	2016
4	Built-in hyperspectral camera for smartphone in visible, near-infrared and middle-infrared lights region (second report): Sensitivity improvement of Fourier-spectroscopic imaging to detect diffuse reflection lights from internal human tissues for healthcare sensors	Kawashima, Natsumi; Hosono, Satsuki; Ishimaru, Ichiro	NEXT-GENERATION SPECTROSCOPIC TECHNOLOGIES IX	2016
1	Design and Implementation of Dynamic Positioning Control System for USV	Ngoc-Huy Tran; Choi, Hyeung-Sik; Oh, Ji-Youn; Jeong, Sang-Ki	AETA 2015: RECENT ADVANCES IN ELECTRICAL ENGINEERING AND RELATED SCIENCES	2016
1	Local and Global Motion Planning for Unmanned Surface Vehicle	Fedorenko, Roman; Gurenko, Boris	2015 3RD INTERNATIONAL CONFERENCE ON CONTROL, MECHATRONICS AND AUTOMATION (ICCMA 2015)	2016
4	Construction of a Special Mobile Robot that Uses a Special Travelling Wheel	Brabec, Pavel; Vozenilek, Robert; Zada, Valav; Beran, Leos	2015 INTERNATIONAL CONFERENCE ON MECHANICAL ENGINEERING AND ELECTRICAL SYSTEMS (ICMES 2015)	2016
4	Adaptive Simplified Fuzzy Logic Controller for Depth Control of Underwater Remotely Operated Vehicle	Aras, Mohd Shahrieel Mohd; Abdullah, Shahrum Shah	INDIAN JOURNAL OF GEO-MARINE SCIENCES	2015
1	Design and testing of a shape memory alloy buoyancy engine for unmanned underwater vehicles	Angilella, Alex J.; Gandhi, Farhan S.; Miller, Timothy F.	SMART MATERIALS AND STRUCTURES	2015
2	Subsea cable tracking by an unmanned surface vehicle	Szyrowski, Tomasz; Motwani, Amit; Sharma, Sanjay K.; Sutton, Robert; Kennedy, Gareth A.	UNDERWATER TECHNOLOGY	2015
4	Performance Evaluation of MC-CDMA over Hybrid Satellite/Underwater Acoustic Channel	Trivedi, Vinay Kumar; Agarwal, Akash; Kumar, Preetam	2015 10TH INTERNATIONAL CONFERENCE ON INFORMATION, COMMUNICATIONS AND SIGNAL PROCESSING (ICICS)	2015
1	Continued Development of Broadband Passive Bearing Estimation	McManus, Steven J.; Green, Dale	OCEANS 2015 - MTS/IEEE WASHINGTON	2015
2	Development of Underwater Inspection System for Dam Inspection Concept and evaluation of simplified dynamics model	Shimono, Soji; Toyama, Shigeki; Nishizawa, Uichi; Matsubara, Osam; Kato, Shin; Arisumi, Hitoshi	OCEANS 2015 - MTS/IEEE WASHINGTON	2015
1	New Algorithm on Merging Graphic Elements of ENC	Zheng, Kai; Sun, Qinggang; Jiang, Yi; Miao, Lei	2015 54TH ANNUAL CONFERENCE OF THE SOCIETY OF INSTRUMENT AND CONTROL ENGINEERS OF JAPAN (SICE)	2015
1	Wind Feed-forward Control of a USV	Qu, Huajin; Sarda, Edoardo I.; Bertaska, Ivan R.; von Ellenrieder, Karl D.	OCEANS 2015 - GENOVA	2015
1	Design and automation of an ocean-going autonomously acting USV	Rentzow, Erik; Dewitz, Detlef; Kurowski, Martin; Lampe, Bernhard P.; Ritz, Sebastian; Kutz, Robert; Golz, Matthias; Boeck, Florin	OCEANS 2015 - GENOVA	2015
1 and 2	An Experiment of Real-time Data Transmission of Sonar Images from cruising UUV to distant support vessel via USV Development of Underwater Real-time Communication System (URCS) by parallel cruising	Suzuki, Naoya; Kitajima, Hitoshi; Kaba, Hideki; Suzuki, Toshimitsu; Suto, Taku; Kobayashi, Akira	OCEANS 2015 - GENOVA	2015
1	Different Drive Models Of USV Under The Wind and Waves Disturbances MPC Trajectory Tracking Simulation Research	Wang, L.; Liu, C. G.; Chu, X. M.	3RD INTERNATIONAL CONFERENCE ON TRANSPORTATION INFORMATION AND SAFETY (ICTIS 2015)	2015
4	Emergency Path Planning Method for Unmanned Underwater Robot	Putra, Yosmar; Park, Dae Gil; Chung, Wan Kyun	2015 12TH INTERNATIONAL CONFERENCE ON UBIQUITOUS ROBOTS AND AMBIENT INTELLIGENCE (URAI)	2015
1	Target Tracking in Marine Environment using Automotive Radar and Laser Range Sensor	Schuster, Michael; Reuter, Johannes	2015 20TH INTERNATIONAL CONFERENCE ON METHODS AND MODELS IN AUTOMATION AND ROBOTICS (MMAR)	2015
4	ACCURACY VERIFICATION OF DSM OBTAINED FROM UAV USING COMMERCIAL SOFTWARE	Tokunaga, Mitsuharu	2015 IEEE INTERNATIONAL GEOSCIENCE AND REMOTE SENSING SYMPOSIUM (IGARSS)	2015
1	Maritime target identification in gated viewing imagery	Hammer, Marcus; Hebel, Marcus; Arens, Michael	ELECTRO-OPTICAL REMOTE SENSING, PHOTONIC TECHNOLOGIES, AND APPLICATIONS IX	2015
4	Automatic structural matching of 3D image data	Ponomarev, Svjatoslav; Lutsiv, Vadim; Malyshev, Igor	ELECTRO-OPTICAL REMOTE SENSING, PHOTONIC TECHNOLOGIES, AND APPLICATIONS IX	2015
1	Improved Genetic Algorithm for Fast Path Planning of USV	Cao, Lu	MIPPR 2015: REMOTE SENSING IMAGE PROCESSING, GEOGRAPHIC INFORMATION SYSTEMS, AND OTHER APPLICATIONS	2015
4	Automated Area Segmentation for Ocean Bottom Surveys	Hyland, John C.; Smith, Cheryl M.	DETECTION AND SENSING OF MINES, EXPLOSIVE OBJECTS, AND OBSCURED TARGETS XX	2015
2	On-water remote monitoring robotic system for estimating the patch coverage of Anabaena sp filaments in shallow water	Romero-Vivas, E.; Von Borstel, F. D.; Perez-Estrada, C. J.; Torres-Arino, D.; Villa-Medina, J. F.; Gutierrez, J.	ENVIRONMENTAL SCIENCE-PROCESSES & IMPACTS	2015
1	A FAST AND ROBUST VISION-BASED HORIZON TRACKING METHOD	Guo, Hao; Zhang, Yi-Meng; Zhou, Jing; Zhang, Yue-Qiang	2015 12TH INTERNATIONAL COMPUTER CONFERENCE ON WAVELET ACTIVE MEDIA TECHNOLOGY AND INFORMATION PROCESSING (ICCWAMTIP)	2015
4	2.1. Experimental and Modeling Terramechanics Studies	Sandu, Corina	ADVANCED AUTONOMOUS VEHICLE DESIGN FOR SEVERE ENVIRONMENTS	2015
1	High-Accuracy Low-Cost RTK-GPS for an Unmannned Surface Vehicle	Matias, B.; Oliveira, H.; Almeida, J.; Dias, A.; Ferreira, H.; Martins, A.; Silva, E.	OCEANS 2015 - GENOVA	2015
1	Supervisory Switching Control of an Unmanned Surface Vehicle	Bertaska, Ivan R.; von Ellenrieder, Karl D.	OCEANS 2015 - MTS/IEEE WASHINGTON	2015
2	REX 2014-Robotic Exercises 2014 Multi-robot field trials	Marques, Mario Monteiro; Martins, Alfredo; Matos, Anibal; Cruz, Nuno; Almeida, Jose Miguel; Alves, Jose Carlos; Lobo, Victor; Silva, Eduardo	OCEANS 2015 - MTS/IEEE WASHINGTON	2015
1	Adaptive Wind Feedforward Control of an Unmanned Surface Vehicle for Station Keeping	Qu, Huajin; von Ellenrieder, Karl D.	OCEANS 2015 - MTS/IEEE WASHINGTON	2015
1	A Bayesian Algorithm for Vision Based Navigation of Autonomous Surface Vehicles	Lebbad, Anderson; Nataraj, C.	PROCEEDINGS OF THE 2015 7TH IEEE INTERNATIONAL CONFERENCE ON CYBERNETICS AND INTELLIGENT SYSTEMS (CIS) AND ROBOTICS, AUTOMATION AND MECHATRONICS (RAM)	2015
1	Vision based Long Range Object Detection and Tracking for Unmanned Surface Vehicle	Wang, Han; Mou, Xiaozheng; Mou, Wei; Yuan, Shenghai; Ulun, Soner; Yang, Shuai; Shin, Bok-Suk	PROCEEDINGS OF THE 2015 7TH IEEE INTERNATIONAL CONFERENCE ON CYBERNETICS AND INTELLIGENT SYSTEMS (CIS) AND ROBOTICS, AUTOMATION AND MECHATRONICS (RAM)	2015
1	Fuzzy Identification and Control Compensation of Unmanned Surface Vehicle Steering System	Bai, Yiming; Zhao, Yongsheng; Fan, Yunsheng	PROCEEDINGS OF THE 2015 JOINT INTERNATIONAL MECHANICAL, ELECTRONIC AND INFORMATION TECHNOLOGY CONFERENCE (JIMET 2015)	2015
4	INTEGRATED NAVIGATION AND PILOTAGE SYSTEMS	Adamski, Miroslaw; Vogt, Ryszard; Cwiklak, Janusz	2014 IEEE CHINESE GUIDANCE, NAVIGATION AND CONTROL CONFERENCE (CGNCC)	2014
1	Extending the Jadex Framework with Coherence-Driven Adaptive Agent Decision-Making Model	Isci, Serkan; Topcu, Okan; Yilmaz, Levent	2014 IEEE/WIC/ACM INTERNATIONAL JOINT CONFERENCES ON WEB INTELLIGENCE (WI) AND INTELLIGENT AGENT TECHNOLOGIES (IAT), VOL 3	2014
4	Preliminary Design for Unmanned Surface Vehicle of Nuclear Leak Monitoring System Using Unmanned Surface Bathymetry Vehicle's Technology for Reference	Jin, Jiucai; Zhang, Jie; Shao, Feng	INFORMATION TECHNOLOGY FOR RISK ANALYSIS AND CRISIS RESPONSE	2014
2	Towing a Boom with Two USVs for Oil Spill Recovery: Scaled Experimental Development	Giron-Sierra, Jose M.; Gheorghita, Alina T.; Angulo, Guillermo; Jimenez, Juan F.	2014 13TH INTERNATIONAL CONFERENCE ON CONTROL AUTOMATION ROBOTICS & VISION (ICARCV)	2014
1	A Collision Avoidance Algorithm Based on the Virtual Target Approach for Cooperative Unmanned Surface Vehicles	Bibuli, Marco; Bruzzone, Gabriele; Caccia, Massimo; Lapierre, Lionel; Zereik, Enrica	2014 22ND MEDITERRANEAN CONFERENCE ON CONTROL AND AUTOMATION (MED)	2014
1	Assessing path-following performance for Unmanned Marine Vehicles with algorithms from Numerical Commutative Algebra	Saggini, E.; Torrente, M.; Riccomagno, E.; Bibuli, M.; Bruzzone, G.; Caccia, M.; Zereik, E.	2014 22ND MEDITERRANEAN CONFERENCE ON CONTROL AND AUTOMATION (MED)	2014
4	Fault Detection Isolation and Reconfiguration Algorithms for Atmospheric Re-entry	Poderico, M.; Morani, G.; Corraro, F.	2014 22ND MEDITERRANEAN CONFERENCE ON CONTROL AND AUTOMATION (MED)	2014
4	Synergetic approach to quadrotor helicopter control with attractor-repeller strategy of nondeterministic obstacles avoidance	Veselov, Gennady E.; Sklyarov, Andrey A.; Sklyarov, Sergey A.	2014 6TH INTERNATIONAL CONGRESS ON ULTRA MODERN TELECOMMUNICATIONS AND CONTROL SYSTEMS AND WORKSHOPS (ICUMT)	2014
4	Kite-type Passive Acoustic Detection System for Underwater Small Targets	Nie, Donghu; Sun, Zongxin; Qiao, Gang; Liu, Songzuo; Yin, Yanling	2014 OCEANS - ST. JOHN'S	2014
4	Development of a Semi-Submersible Unmanned Surface Craft	Smith, Nathan; Bachmayer, Ralf; Li, Zhi; Luchino, Federico	2014 OCEANS - ST. JOHN'S	2014
4	Application of a Maneuvering Propulsor Technology to Undersea Vehicles	Huyer, Stephen A.	JOURNAL OF FLUIDS ENGINEERING-TRANSACTIONS OF THE ASME	2014
4	Morphing hull implementation for unmanned underwater vehicles	Miller, Timothy F.; Gandhi, Farhan; Rufino, Russell J.	SMART MATERIALS AND STRUCTURES	2013
4	A novel plane extraction approach using supervised learning	Siddiqui, J. Rafid; Havaei, Mohammad; Khatibi, Siamak; Lindley, Craig A.	MACHINE VISION AND APPLICATIONS	2013
1 and 2	Analysis of Spatial-Temporal Sampling and Equal Distance Parallel Formation Control of Unmanned Surface Bathymetric Vehicle Regular Paper	Jin, Jiucai; Zhang, Jie; Guan, Sheng; Ma, Yi	INTERNATIONAL JOURNAL OF ADVANCED ROBOTIC SYSTEMS	2013
4	Fusing Laser Point Cloud and Visual Image at Data Level Using a New Reconstruction Algorithm	Zhou, Lipu	2013 IEEE INTELLIGENT VEHICLES SYMPOSIUM (IV)	2013
1	EXPERIMENTAL EVALUATION OF APPROACH BEHAVIOR FOR AUTONOMOUS SURFACE VEHICLES	Bertaska, Ivan R.; Alvarez, Jose; Sinisterra, Armando; von Ellenrieder, Karl; Dhanak, Manhar; Shah, Brual; Svec, Petr; Gupta, Satyandra K.	ASME 2013 DYNAMIC SYSTEMS AND CONTROL CONFERENCE, VOL 2	2013
4	Spatial variability of environmental conditions in fjords and the importance for aquaculture	Asplin, Lars; Sandvik, Anne D.; Johnsen, Ingrid A.; Albretsen, Jon; Wehde, Henning; Hovstein, Vegard Evjen	2013 MTS/IEEE OCEANS - BERGEN	2013
1 and 2	Intelligent Autonomy for Collaborative Intervention Missions of Unmanned Maritime Vehicles	Insaurralde, Carlos C.; Petillot, Yvan R.	2013 OCEANS - SAN DIEGO	2013
4	Physical modeling of Mastigias papua feeding structures and simulation of their effect on bell stress and kinematics	Michael, Tyler; Villanueva, Alex; Joshi, Keyur; Priya, Shashank	BIOINSPIRATION, BIOMIMETICS, AND BIOREPLICATION 2013	2013
2	A Carrying Platform of Spilled Oil Recovery System used on Unmanned Surface Vehicle	Cai, Kun; Wang, Jianhua; Yang, Yongsheng	ENGINEERING SOLUTIONS FOR MANUFACTURING PROCESSES, PTS 1-3	2013
1	Design and Implementation for USV Based on Fuzzy Control	Chen, Chiung Hsing; Chen, Guan-Yu; Chen, Jwu Jenq	2013 CACS INTERNATIONAL AUTOMATIC CONTROL CONFERENCE (CACS)	2013
4	Empirical Channel Models for Optimized Communications in a Network of Unmanned Ground Vehicles	Sasloglou, K.; Glover, I. A.; Gazis, V.; Kikiras, P.; Mathioudakis, K.; Andonovic, I.	2013 IEEE INTERNATIONAL SYMPOSIUM ON SIGNAL PROCESSING AND INFORMATION TECHNOLOGY (IEEE ISSPIT 2013)	2013
4	Computer-based Simulation of the Wayamba Unmanned Underwater Vehicle	Madden, C.; Sgarioto, D.	20TH INTERNATIONAL CONGRESS ON MODELLING AND SIMULATION (MODSIM2013)	2013
1	Modelling the performance of USV manoeuvring and target tracking: an approach using frequency modulated continuous wave radar rotary system	Onunka, Chiemela; Nnadozie, Remigius Chidozie	SPRINGERPLUS	2013
2	Demonstration of Advanced Sensors for Underwater Unexploded Ordnance (UXO) Detection	Clem, Ted R.; Sternlicht, Daniel D.; Fernandez, Jose E.; Prater, James L.; Holtzapple, Richard; Gibson, Robert P.; Klose, John P.; Marston, Timothy M.	2012 OCEANS	2012
4	Flight Stability Study of Micro Air Vehicle with Elastic Aerodynamic Shape	Yu, Yanan; Yang, Qingping; Wang, Xiangjun	2012 IEEE INTERNATIONAL INSTRUMENTATION AND MEASUREMENT TECHNOLOGY CONFERENCE (I2MTC)	2012
4	Online Path Planning for UAV Navigation Based on Quantum Particle Swarm Optimization	Guo, Jinchao; Wang, Junjie; Cui, Guangzhao	ADVANCED TECHNOLOGY IN TEACHING - PROCEEDINGS OF THE 2009 3RD INTERNATIONAL CONFERENCE ON TEACHING AND COMPUTATIONAL SCIENCE (WTCS 2009), VOL 1: INTELLIGENT UBIQUITIOUS COMPUTING AND EDUCATION	2012
4	Levy Walks for Autonomous Search	Flenner, Arjuna; Flenner, Jennifer; Bobinchak, James; Mercier, David; Le, Anhtuan; Estabridis, Katia; Hewer, Gary	GROUND/AIR MULTISENSOR INTEROPERABILITY, INTEGRATION, AND NETWORKING FOR PERSISTENT ISR III	2012
4	Intelligence Algorithms for Autonomous Navigation in a Ground Vehicle	Petkovsek, Steve; Shakya, Rahul; Shin, Young Ho; Gautam, Prasanna; Norton, Adam; Ahlgren, David J.	INTELLIGENT ROBOTS AND COMPUTER VISION XXIX: ALGORITHMS AND TECHNIQUES	2012
4	Unstructured road detection based on hybrid features	Shang, Erke; An, Xiangjing; Ye, Lei; Shi, Meiping; Xue, Hongtao; He, Hangen	PROCEEDINGS OF THE 2ND INTERNATIONAL CONFERENCE ON COMPUTER AND INFORMATION APPLICATIONS (ICCIA 2012)	2012
1	GENERATION OF STATE TRANSITION MODELS USING SIMULATIONS FOR UNMANNED SEA SURFACE VEHICLE TRAJ ECTORY PLANNING	Thakur, Atul; Svec, Petr; Gupta, Satyandra K.	PROCEEDINGS OF THE ASME INTERNATIONAL DESIGN ENGINEERING TECHNICAL CONFERENCES AND COMPUTERS AND INFORMATION IN ENGINEERING CONFERENCE - 2011, VOL 6, PTS A AND B	2012
1 and 2	Design and analysis of laminar hull SWATH based unmanned surface vehicle	Muljowidodo, K.; Nugroho, Sapto Adi; Prayogo, Nico; Sudaryono, Munif	INDIAN JOURNAL OF GEO-MARINE SCIENCES	2011
1	Motion Modeling and Simulation of High-speed Unmanned Surface Vehicle	Yue, Jin; Ren, Guang; Liang, Xiao; Qi, Xiaowei; Li, Gengtian	FRONTIERS OF MANUFACTURING AND DESIGN SCIENCE, PTS 1-4	2011
1	Automated Planning Logic Synthesis for Autonomous Unmanned Vehicles in Competitive Environments with Deceptive Adversaries	Svec, Petr; Gupta, Satyandra K.	NEW HORIZONS IN EVOLUTIONARY ROBOTICS: EXTENDED CONTRIBUTIONS FROM THE 2009 EVODEROB WORKSHOP	2011
1	Stabilization Control and Simulation of an Unmanned Surface Vessel	Liu Zhilin; Yu Ruiting; Zhu Qidan	2011 30TH CHINESE CONTROL CONFERENCE (CCC)	2011
1	Safe Maritime Navigation with COLREGS Using Velocity Obstacles	Kuwata, Yoshiaki; Wolf, Michael T.; Zarzhitsky, Dimitri; Huntsberger, Terrance L.	2011 IEEE/RSJ INTERNATIONAL CONFERENCE ON INTELLIGENT ROBOTS AND SYSTEMS	2011
2	METHOD FOR PERFORMING RAPID RADIATION SURVEYS OF THE WATER AREAS AT SHORE BASES OF THE NAVAL FLEET USING SUBMERSIBLE GAMMA SPECTROMETERS	Kazennov, A. Yu.; Gaponov, I. A.; Pimenov, A. E.	ATOMIC ENERGY	2010
2	Development of a New Unmanned Semi-Submersible (USS) Vehicle	Alleman, Pete; Kleiner, Art; Steed, Chad; Hook, Dan	OCEANS 2009, VOLS 1-3	2009
1	A stereo camera system for the Autonomous Maritime Navigation (AMN) vehicles	Zhang, Weihong; Zhuang, Ping; Elkins, Les; Simon, Rick; Gore, David; Cogar, Jeff; Hildebrand, Kevin; Crawford, Steve; Fuller, Joe	UNMANNED SYSTEMS TECHNOLOGY XI	2009
4	Modelling and robust control of fluidic thrust vectoring and circulation control for unmanned air vehicles	Gu, D-W; Natesan, K.; Postlethwaite, I.	PROCEEDINGS OF THE INSTITUTION OF MECHANICAL ENGINEERS PART I-JOURNAL OF SYSTEMS AND CONTROL ENGINEERING	2008
4	Energy Harvesting from Small Unmmaned Air Vehicles	Anton, S. R.; Erturk, A.; Inman, D. J.	2008 17TH IEEE INTERNATIONAL SYMPOSIUM ON THE APPLICATIONS OF FERROELECTRICS	2008
2	Seakeeping System Trades for Coordinated Air-Surface-Underwater Operations	Bingham, Brian S.; Prechtl, Eric F.; Wilson, Richard A.	OCEANS 2008, VOLS 1-4	2008
3	Unmanned Surface Vehicles, 15 Years of Development	Manley, Justin E.	OCEANS 2008, VOLS 1-4	2008
2	A Wind and Solar-Powered Autonomous Surface Vehicle for Sea Surface Measurements	Rynne, P. F.; von Ellenrieder, K. D.	OCEANS 2008, VOLS 1-4	2008
4	Application of Fuzzy Control to Steering of Semiautonomous Underwater Vehicle	Garus, Jerzy; Szymak, Piotr	PROCEEDINGS OF THE 7TH WSEAS INTERNATIONAL CONFERENCE ON CIRCUITS, SYSTEMS, ELECTRONICS, CONTROL AND SIGNAL PROCESSING (CSECS'08)	2008
1	Semiautomatic Control of Self-propelled Mine Counter Charge in Plane Motion	Garus, Jerzy; Szymak, Piotr	PROCEEDINGS OF THE 8TH WSEAS INTERNATIONAL CONFERENCE ON ELECTRIC POWER SYSTEMS, HIGH VOLTAGES, ELECTRIC MACHINES	2008
4	Demonstration of a plug-and-play approach to spacecraft thermal control system design	Maxwell, Eric B.; Cole, Gregory S.; Scaringe, Robert P.; Didion, Jeffrey	SPACE TECHNOLOGY AND APPLICATIONS INTERNATIONAL FORUM STAIF 2008	2008
1	Hardware design and UKF-based tracking control design of Ummanned Trimaran Surface Vehicle	Peng, Yan; Zhou, Bo; Han, Jianda	2007 IEEE INTERNATIONAL CONFERENCE ON ROBOTICS AND BIOMIMETICS, VOLS 1-5	2007
4	Design and initial in-water testing of advanced non-linear control algorithms onto an Unmanned Underwater Vehicle (UUV)	Djapic, Vladimir; Farrell, J. A.; Nfiller, Paul; Arrieta, Rich	2007 OCEANS, VOLS 1-5	2007
4	Modeling, sensorics and control of a robotic airship	Gerke, Michael; Masar, Ivan	PROCEEDINGS OF THE 13TH IASTED INTERNATIONAL CONFERENCE ON ROBOTICS AND APPLICATIONS/PROCEEDINGS OF THE IASTED INTERNATIONAL CONFERENCE ON TELEMATICS	2007
4	A comparative study of two UCAV type wing planforms - performance and stability considerations	Nangia, R. K.; Palmer, M. E.	AERONAUTICAL JOURNAL	2006
4	Passive microwave retrieval of land surface properties	Owe, Manfred; de Jeu, Richard A. M.; Holmes, Thomas R. H.	PASSIVE MILLIMETER-WAVE IMAGING TECHNOLOGY IX	2006
1	MetaSensor: Development of a Low-Cost, High Quality Attitude Heading Reference System	Elkaim, Gabriel Hugh; Foster, Christopher C.	PROCEEDINGS OF THE 19TH INTERNATIONAL TECHNICAL MEETING OF THE SATELLITE DIVISION OF THE INSTITUTE OF NAVIGATION (ION GNSS 2006)	2006
4	System design and development of a deep-sea unmanned underwater vehicle 'HEMIRIE' for oceanographic research	Lee, Pan-Mook; Lee, Chong-Moo; Jun, Bong-Huan; Choi, Hyun Taek; Li, Ji-Hong; Kim, Sea-Moon; Kim, Kihun; Lim, Yong-Kon; Yang, Seung-Il; Hong, Seok-Won; Han, Sang-Chul; Gu, Beob-Mo; Lee, Sang-Ryul; Seo, Young-Woo; Aoki, Taro; Bowen, Andy	PROCEEDINGS OF THE SIXTEENTH (2006) INTERNATIONAL OFFSHORE AND POLAR ENGINEERING CONFERENCE, VOL 2	2006
4	Unmanned/unattended naval undersea sensor systems: Examples of today's technologies and challenges for the future - art. no. 623103	Pistacchio, David	Unattended Ground , Sea, and Air Sensor Technologies and Applications VIII	2006
4	Multi-sensor integration for unmanned terrain modeling	Sukumar, Sreenivas R.; Yu, Sijie; Page, David L.; Koschan, Andreas F.; Abidi, Mongi A.	UNMANNED SYSTEMS TECHNOLOGY VIII, PTS 1 AND 2	2006
4	Simulated mobile self-location using 3D range sensing and an a-priori map	Little, C; Peters, R	2005 IEEE International Conference on Robotics and Automation (ICRA), Vols 1-4	2005
2	Multi-platform sonar-based systems for submerged threats operating in littorals.	Whalen, Joseph E.; Wallace, George	OCEANS 2005, VOLS 1-3	2005
2	SeaKeeper - An operational remote minehunting system	Ferguson, JS; Waquet, P; Hopkin, D	PROCEEDINGS OF THE FOURTEENTH (2004) INTERNATIONAL OFFSHORE AND POLAR ENGINEERING CONFERENCE, VOL 2	2004
4	Beam driven stratospheric airship	Onda, M	BEAMED ENERGY PROPULSION	2003
4	Tow vehicle depth verification	Harris, MM; Avera, WE; Bibee, LD	OCEANS 2002 MTS/IEEE CONFERENCE & EXHIBITION, VOLS 1-4, CONFERENCE PROCEEDINGS	2002
4	An adaptive control for multiple unmanned underwater crawling vehicles	Lee, KH	PROCEEDINGS OF THE FIFTH (2002) ISOPE PACIFIC/ASIA OFFSHORE MECHANICS SYMPOPSIUM	2002
4	Mine Hunter/Killer system performance results (U)	Schweitzer, T; Watts, T; Wright, N; Cornell, D	DETECTION AND REMEDIATION TECHNOLOGIES FOR MINES AND MINELIKE TARGETS VI, PTS 1 AND 2	2001
4	Three dimensional computer vision for micro air vehicles	Pipitone, F; Kamgar-Parsi, B; Hartley, RL	ENHANCED AND SYNTHETIC VISION 2001	2001
4	Underwater vision method for low-visibility turbulent conditions	Botelho-Ribeiro, L	OCEANS 2001 MTS/IEEE: AN OCEAN ODYSSEY, VOLS 1-4, CONFERENCE PROCEEDINGS	2001
4	Application requirements of artificial muscles for swimming robots	Kerrebrock, PA; Anderson, JM; Parry, J	SMART STRUCTURES AND MATERIALS 2001: ELECTROACTIVE POLYMER ACTUATORS AND DEVICES	2001
4	Aerodynamic and aeroelastic characteristics of the DARPA Smart Wing phase II wind tunnel model	Sanders, B; Martin, C; Cowan, D	SMART STRUCTURES AND MATERIALS 2001: INDUSTRIAL AND COMMERCIAL APPLICATIONS OF SMART STRUCTURES TECHNOLOGIES	2001
4	Autonomous robotic positioning umbilical system	Houshangi, N	SMC 2000 CONFERENCE PROCEEDINGS: 2000 IEEE INTERNATIONAL CONFERENCE ON SYSTEMS, MAN & CYBERNETICS, VOL 1-5	2000
4	Iterative construction of low-altitude UAV air route network in urban areas: Case planning and assessment	Xu, Chenchen; Liao, Xiaohan; Ye, Huping; Yue, Huanyin	JOURNAL OF GEOGRAPHICAL SCIENCES	2020
4	Identifying research directions of a remotely-controlled merchant ship by revisiting her system-theoretic safety control structure	Wrobel, Krzysztof; Gil, Mateusz; Montewka, Jakub	SAFETY SCIENCE	2020
1	Efficient obstacle detection based on prior estimation network and spatially constrained mixture model for unmanned surface vehicles	Liu, Jingyi; Li, Hengyu; Luo, Jun; Xie, Shaorong; Sun, Yu	JOURNAL OF FIELD ROBOTICS	2020
1	A stakeholder framework for evaluating the -ilities of autonomous behaviors in complex adaptive systems	Douglas, Andre; Mazzuchi, Thomas; Sarkani, Shahram	SYSTEMS ENGINEERING	2020
1	Neural-network-based adaptive output-feedback formation tracking control of USVs under collision avoidance and connectivity maintenance constraints	Dong, Chao; Ye, Qingzhao; Dai, Shi-Lu	NEUROCOMPUTING	2020
1	Adaptive Platoon Control for Marine Surface Vehicles in the Presence of Constraints	Liang, Xiaoling; Wang, Duansong	COMPLEXITY	2020
1	Path-Following With LiDAR-Based Obstacle Avoidance of an Unmanned Surface Vehicle in Harbor Conditions	Villa, Jose; Aaltonen, Jussi; Koskinen, Kari T.	IEEE-ASME TRANSACTIONS ON MECHATRONICS	2020
1	Sea-Sky Line Detection Methods: An Overview	Feng Tianwei; Liu Jinqing; Xiao Jinchao; Xiong Junfeng	LASER & OPTOELECTRONICS PROGRESS	2020
4	Depth-adaptive controller for spent nuclear fuel inspections	Song, Bongsub; Park, Jongwon; Yun, Dongwon	NUCLEAR ENGINEERING AND TECHNOLOGY	2020
1	Moving path following control for a surface vessel with error constraint	Zheng, Zewei	AUTOMATICA	2020
1	A Time-Varying Lookahead Distance of ILOS Path Following for Unmanned Surface Vehicle	Mu, Dongdong; Wang, Guofeng; Fan, Yunsheng	JOURNAL OF ELECTRICAL ENGINEERING & TECHNOLOGY	2020
1	Hierarchical Path Planning of Unmanned Surface Vehicles: A Fuzzy Artificial Potential Field Approach	Wang, Ning; Xu, Hongwei; Li, Chengzhong; Yin, Jianchuan	INTERNATIONAL JOURNAL OF FUZZY SYSTEMS	2020
1 and 2	Interoperability Among Unmanned Maritime Vehicles: Review and First In-field Experimentation	Costanzi, Riccardo; Fenucci, Davide; Manzari, Vincenzo; Micheli, Michele; Morlando, Luca; Terracciano, Daniele; Caiti, Andrea; Stifani, Mirko; Tesei, Alessandra	FRONTIERS IN ROBOTICS AND AI	2020
1	Sea-sky line detection using gray variation differences in the time domain for unmanned surface vehicles	Li, Fangxu; Zhang, Jie; Sun, Weifeng; Jin, Jiucai; Li, Ligang; Dai, Yongshou	SIGNAL IMAGE AND VIDEO PROCESSING	2020
4	Using UAV Photogrammetry to Analyse Changes in the Coastal Zone Based on the Sopot Tombolo (Salient) Measurement Project	Burdziakowski, Pawel; Specht, Cezary; Dabrowski, Pawel S.; Specht, Mariusz; Lewicka, Oktawia; Makar, Artur	SENSORS	2020
4	Adaptive agent tracking approach for oil contamination in water environments	Huang, Xiaoci; Yi, Jianjun; Chen, Yang; Zhu, Xiaomin; Dai, Zhiyong	INTERNATIONAL JOURNAL OF ADVANCED ROBOTIC SYSTEMS	2020
1	Long-Distance Path Planning for Unmanned Surface Vehicles in Complex Marine Environment	Shah, Brual C.; Gupta, Satyandra K.	IEEE JOURNAL OF OCEANIC ENGINEERING	2020
4	Sizing Drop Weights for Deep Diving Submersibles Taking Into Account Nonuniform Seawater Density Profiles	Thornton, Blair	IEEE JOURNAL OF OCEANIC ENGINEERING	2020
1	Ensemble learning approach based on stacking for unmanned surface vehicle's dynamics	Cheng, Chen; Xu, Peng-Fei; Cheng, Hongxia; Ding, Yanxu; Zheng, Jinhai; Ge, Tong; Sun, Dianhong; Xu, Jin	OCEAN ENGINEERING	2020
2	USV based automatic deployment of booms along quayside mooring ships: Scaled experiments and simulations	Jimenez, Juan F.; Giron-Sierra, Jose M.	OCEAN ENGINEERING	2020
4	Underwater surface scan utilizing an unmanned underwater vehicle with sampled range information	Kim, Jonghoek	OCEAN ENGINEERING	2020
1	Online planning for relative optimal and safe paths for USVs using a dual sampling domain reduction-based RRT* method	Wen, Naifeng; Zhang, Rubo; Wu, Junwei; Liu, Guanqun	INTERNATIONAL JOURNAL OF MACHINE LEARNING AND CYBERNETICS	2020
1 and 2	Stabilizing Control of an Unmanned Surface Vehicle Pushing a Floating Load	Rosario, Rafael Vida Castro; Cunha, Jose Paulo V. S.; Garcia-Rosa, Paula B.	INTERNATIONAL JOURNAL OF CONTROL AUTOMATION AND SYSTEMS	2020
1	Path-following control of unmanned surface vehicles with unknown dynamics and unmeasured velocities	Qu, Xingru; Liang, Xiao; Hou, Yuanhang; Li, Ye; Zhang, Rubo	JOURNAL OF MARINE SCIENCE AND TECHNOLOGY	2020
1	Architecture-Based Security or UxVs	Berzins, Valdis	NAVAL ENGINEERS JOURNAL	2020
4	The Lightly Manned Autonomous Combat Capability (LMACC)	Mun, Johnathan C.; Gallup, Shelley	NAVAL ENGINEERS JOURNAL	2020
2	In-situ remotely controllable ocean radiation monitoring system	Lee, S.; Lee, J. S.; Kim, H. S.; Park, J.; Baek, S.; Song, Y.; Seo, J-M; Kim, S. M.	JOURNAL OF INSTRUMENTATION	2020
2	Monitoring of Sea-Ice-Atmosphere Interface in the Proximity of Arctic Tidewater Glaciers: The Contribution of Marine Robotics	Bruzzone, Gabriele; Odetti, Angelo; Caccia, Massimo; Ferretti, Roberta	REMOTE SENSING	2020
2	Comparison of Satellite-Derived Sea Surface Temperature and Sea Surface Salinity Gradients Using the Saildrone California/Baja and North Atlantic Gulf Stream Deployments	Vazquez-Cuervo, Jorge; Gomez-Valdes, Jose; Bouali, Marouan	REMOTE SENSING	2020
1	Data-driven robust backstepping control of unmanned surface vehicles	Weng, Yongpeng; Wang, Ning	INTERNATIONAL JOURNAL OF ROBUST AND NONLINEAR CONTROL	2020
1	An improved integral light-of-sight guidance law for path following of unmanned surface vehicles	Wan, Lili; Su, Yixin; Zhang, Huajun; Shi, Binghua; AbouOmar, Mahmoud S.	OCEAN ENGINEERING	2020
2	Trustable Environmental Monitoring by Means of Sensors Networks on Swarming Autonomous Marine Vessels and Distributed Ledger Technology	Berman, Ivan; Zereik, Enrica; Kapitonov, Aleksandr; Bonsignorio, Fabio; Khassanov, Alisher; Oripova, Aziza; Lonshakov, Sergei; Bulatov, Vitaly	FRONTIERS IN ROBOTICS AND AI	2020
4	Dimensional control of cylindrical structures for unmanned underwater vehicles: Comparative study of the most advanced techniques	Mascaraque-Ramirez, Carlos; Martinez-Botella, Fco. de Borja	PROCEEDINGS OF THE INSTITUTION OF MECHANICAL ENGINEERS PART M-JOURNAL OF ENGINEERING FOR THE MARITIME ENVIRONMENT	2020
1 and 2	Clustered coverage orienteering problem of unmanned surface vehicles for water sampling	Zhang, Wei; Wang, Kai; Wang, Shuaian; Laporte, Gilbert	NAVAL RESEARCH LOGISTICS	2020
1	Multi-USV System Cooperative Underwater Target Search Based on Reinforcement Learning and Probability Map	Liu, Yuan; Peng, Yan; Wang, Min; Xie, Jiajia; Zhou, Rui	MATHEMATICAL PROBLEMS IN ENGINEERING	2020
4	Mechanism of dynamic automatic collision avoidance and the optimal route in multi-ship encounter situations	Mou Junmin; Li Mengxia; Hu Weixuan; Zhang Xiaohan; Gong Shuai; Chen Pengfei; He Yixiong	JOURNAL OF MARINE SCIENCE AND TECHNOLOGY	2020
1	Collision-avoidance under COLREGS for unmanned surface vehicles via deep reinforcement learning	Ma, Yong; Zhao, Yujiao; Wang, Yulong; Gan, Langxiong; Zheng, Yuanzhou	MARITIME POLICY & MANAGEMENT	2020
4	Using Unmanned Aerial Vehicles (UAVs) to assess humpback whale behavioral responses to swim-with interactions in Vava'u, Kingdom of Tonga	Fiori, Lorenzo; Martinez, Emmanuelle; Orams, Mark B.; Bollard, Barbara	JOURNAL OF SUSTAINABLE TOURISM	2020
1	Coordinated path-following control for networked unmanned surface vehicles	Chen, Dong-Liang; Liu, Guo-Ping; Zhang, Ru-Bo; Qu, Xingru	INTERNATIONAL JOURNAL OF ADVANCED ROBOTIC SYSTEMS	2020
1	Artificial potential field-based swarm finding of the unmanned surface vehicles in the dynamic ocean environment	Tan, Guoge; Zhuang, Jiayuan; Zou, Jin; Wan, Lei; Sun, Zhiyuan	INTERNATIONAL JOURNAL OF ADVANCED ROBOTIC SYSTEMS	2020
4	A New Identification Method for Surface Cracks from UAV Images Based on Machine Learning in Coal Mining Areas	Zhang, Fan; Hu, Zhenqi; Fu, Yaokun; Yang, Kun; Wu, Qunying; Feng, Zewei	REMOTE SENSING	2020
2	Integrated Geodetic and Hydrographic Measurements of the Yacht Port for Nautical Charts and Dynamic Spatial Presentation	Makar, Artur; Specht, Cezary; Specht, Mariusz; Dabrowski, Pawel; Szafran, Maciej	GEOSCIENCES	2020
1	AutoTuning Environment for Static Obstacle Avoidance Methods Applied to USVs	Guardeno, Rafael; Lopez, Manuel J.; Sanchez, Jesus; Consegliere, Agustin	JOURNAL OF MARINE SCIENCE AND ENGINEERING	2020
1	Dynamics Modeling and Motion Simulation of USV/UUV with Linked Underwater Cable	Hong, Sung Min; Ha, Kyoung Nam; Kim, Joon-Young	JOURNAL OF MARINE SCIENCE AND ENGINEERING	2020
1	Path Following of a Water-Jetted USV Based on Maneuverability Tests	Mou, Junmin; He, Yangying; Zhang, Benren; Li, Shixuan; Xiong, Yong	JOURNAL OF MARINE SCIENCE AND ENGINEERING	2020
1	Study on Control System of Integrated Unmanned Surface Vehicle and Underwater Vehicle	Cho, Hyun Joon; Jeong, Sang-Ki; Ji, Dae-Hyeong; Ngoc-Huy Tran; Mai The Vu; Choi, Hyeung-Sik	SENSORS	2020
1	Object tracking algorithm for unmanned surface vehicle based on improved mean-shift method	Xiang, Zuquan; Tao, Tao; Song, Lifei; Dong, Zaopeng; Mao, Yunsheng; Chu, Shixin; Wang, Hanfang	INTERNATIONAL JOURNAL OF ADVANCED ROBOTIC SYSTEMS	2020
1	Communication System Between the ROV and the USV's Edredon Control Post	Kitowski, Zygmunt	NASE MORE	2020
1	Nonlinear Disturbance Observer Based Sliding Mode Control of Quadrotor Helicopter	Maqsood, Hamid; Qu, Yaohong	JOURNAL OF ELECTRICAL ENGINEERING & TECHNOLOGY	2020
1	Adaptive neural network-based fault-tolerant trajectory-tracking control of unmanned surface vessels with input saturation and error constraints	Qin, Hongde; Li, Chengpeng; Sun, Yanchao	IET INTELLIGENT TRANSPORT SYSTEMS	2020
1	Local Path Planning for Unmanned Surface Vehicle Collision Avoidance Based on Modified Quantum Particle Swarm Optimization	Xia, Guoqing; Han, Zhiwei; Zhao, Bo; Wang, Xinwei	COMPLEXITY	2020
4	An Intelligent Ship Image/Video Detection and Classification Method with Improved Regressive Deep Convolutional Neural Network	Huang Zhijian; Sui Bowen; Wen Jiayi; Jiang Guohe	COMPLEXITY	2020
2	Improved 'Infotaxis' Algorithm-Based Cooperative Multi-USV Pollution Source Search Approach in Lake Water Environment	Huang, Xiaoci	SYMMETRY-BASEL	2020
4	Correction Algorithm for the Navigation System of an Autonomous Unmanned Underwater Vehicle	Chen, Danhe; Neusypin, K. A.; Selezneva, M. S.	SENSORS	2020
2	Design and Experiments of a Water Color Remote Sensing-Oriented Unmanned Surface Vehicle	Li, Yong; Tian, Liqiao; Li, Wenkai; Li, Jian; Wei, Anna; Li, Sen; Tong, Ruqing	SENSORS	2020
1	A COLREGs-Based Dynamic Navigation Safety Domain for Unmanned Surface Vehicles: A Case Study of Dolphin-I	Zhou, Jian; Wang, Chenxu; Zhang, Anmin	JOURNAL OF MARINE SCIENCE AND ENGINEERING	2020
4	Autonomous Underwater Vehicle Homing With a Single Range-Only Beacon	Keane, James R.; Forrest, Alexander L.; Johannsson, Hordur; Battle, David	IEEE JOURNAL OF OCEANIC ENGINEERING	2020
1	DEVELOPMENT OF NAVIGATION SYSTEM FOR UNMANNED SURFACE VEHICLE BY IMPROVING PATH TRACKING PERFORMANCE	Shamsuddin, Putri Nur Farhanah Mohd; Mansor, Muhamad Arifpin; Ramli, Roshahliza M.; Jaapar, Raja Mariatul Qibtiah Raja	JOURNAL OF ENGINEERING SCIENCE AND TECHNOLOGY	2020
1	Modeling of Autonomous Hydrofoil Craft Tracking a Moving Target	Matveev, Konstantin, I	UNMANNED SYSTEMS	2020
4	Exploiting Singular Configurations for Controllable, Low-Power Friction Enhancement on Unmanned Ground Vehicles	Foris, Adam; Wagener, Nolan; Boots, Byron; Mazumdar, Anirban	IEEE ROBOTICS AND AUTOMATION LETTERS	2020
2	A Low-Cost Unmanned Surface Vehicle for Pervasive Water Quality Monitoring	Madeo, Dario; Pozzebon, Alessandro; Mocenni, Chiara; Bertoni, Duccio	IEEE TRANSACTIONS ON INSTRUMENTATION AND MEASUREMENT	2020
1	Reinforcement Learning-Based Tracking Control of USVs in Varying Operational Conditions	Martinsen, Andreas B.; Lekkas, Anastasios M.; Gros, Sebastien; Glomsrud, Jon Arne; Pedersen, Tom Arne	FRONTIERS IN ROBOTICS AND AI	2020
1	Uncertainty optimisation design of USV based on the Six Sigma method	Hou, Yuanhang; Kang, Kai; Xiong, Yeping; Liang, Xiao; Su, Linfang	OCEAN ENGINEERING	2020
1	Data driven hybrid edge computing-based hierarchical task guidance for efficient maritime escorting with multiple unmanned surface vehicles	Xie, Jiajia; Luo, Jun; Peng, Yan; Xie, Shaorong; Pu, Huayan; Li, Xiaomao; Su, Zhou; Liu, Yuan; Zhou, Rui	PEER-TO-PEER NETWORKING AND APPLICATIONS	2020
3	Autonomous vessels: state of the art and potential opportunities in logistics	Gu, Yewen; Goez, Julio Cesar; Guajardo, Mario; Wallace, Stein W.	INTERNATIONAL TRANSACTIONS IN OPERATIONAL RESEARCH	2020
2	Intelligent Wide-Area Water Quality Monitoring and Analysis System Exploiting Unmanned Surface Vehicles and Ensemble Learning	Cao, Huiru; Guo, Zhongwei; Wang, Shian; Cheng, Haixiu; Zhan, Choujun	WATER	2020
1	Optimized Radial Basis Function Neural Network Based Intelligent Control Algorithm of Unmanned Surface Vehicles	Wang, Renqiang; Li, Donglou; Miao, Keyin	JOURNAL OF MARINE SCIENCE AND ENGINEERING	2020
1	Path planning for unmanned surface vehicle based on predictive artificial potential field	Song, Jia; Hao, Ce; Su, Jiangcheng	INTERNATIONAL JOURNAL OF ADVANCED ROBOTIC SYSTEMS	2020
1	Nonlinear Optimal Control Law of Autonomous Unmanned Surface Vessels	Chen, Yung-Yue; Lee, Chun-Yen; Tseng, Shao-Han; Hu, Wei-Min	APPLIED SCIENCES-BASEL	2020
1	Online Heuristically Planning for Relative Optimal Paths Using a Stochastic Algorithm for USVs	Wen, Naifeng; Zhang, Rubo; Liu, Guanqun; Wu, Junwei	JOURNAL OF NAVIGATION	2020
1	Sampled-Data Consensus Control of MUSV Systems with Channel Fading and Transmission Delay	Wang, Liyuan; Yue, Wei; Zhang, Rubo	CHINA COMMUNICATIONS	2020
1	Improved Denoising Autoencoder for Maritime Image Denoising and Semantic Segmentation of USV	Qiu, Yuhang; Yang, Yongcheng; Lin, Zhijian; Chen, Pingping; Luo, Yang; Huang, Wenqi	CHINA COMMUNICATIONS	2020
4	Nonlinear Adaptive Line-of-Sight Path Following Control of Unmanned Aerial Vehicles considering Sideslip Amendment and System Constraints	Cui, Zhengyang; Wang, Yong	MATHEMATICAL PROBLEMS IN ENGINEERING	2020
1	Motion planning for an unmanned surface vehicle based on topological position maps	Zhou, Chunhui; Gu, Shangding; Wen, Yuanqiao; Du, Zhe; Xiao, Changshi; Huang, Liang; Zhu, Man	OCEAN ENGINEERING	2020
1	Nonlinear guidance law algorithm applied to a small unmanned surface vehicle	Hernandez-Morales, Luis; Valeriano-Medina, Yunier; Hernandez-Santana, Luis; Mesa-Suarez, Ernesto	PROCEEDINGS OF THE INSTITUTION OF MECHANICAL ENGINEERS PART M-JOURNAL OF ENGINEERING FOR THE MARITIME ENVIRONMENT	2020
1	A motion planning method for unmanned surface vehicle in restricted waters	Gu, Shangding; Zhou, Chunhui; Wen, Yuanqiao; Zhong, Xi; Zhu, Man; Xiao, Changshi; Du, Zhe	PROCEEDINGS OF THE INSTITUTION OF MECHANICAL ENGINEERS PART M-JOURNAL OF ENGINEERING FOR THE MARITIME ENVIRONMENT	2020
2	Test of unmanned surface vehicles to conduct remote focal follow studies of a marine predator	Kuhn, Carey E.; De Robertis, Alex; Sterling, Jeremy; Mordy, Calvin W.; Meinig, Christian; Lawrence-Slavas, Noah; Cokelet, Edward; Levine, Mike; Tabisola, Heather; Jenkins, Richard; Peacock, David; Vo, Danny	MARINE ECOLOGY PROGRESS SERIES	2020
1	Path Following of Underactuated Unmanned Surface Vehicle Based on Trajectory Linearization Control with Input Saturation and External Disturbances	Qiu, Bingbing; Wang, Guofeng; Fan, Yunsheng; Mu, Dongdong; Sun, Xiaojie	INTERNATIONAL JOURNAL OF CONTROL AUTOMATION AND SYSTEMS	2020
2	Development of an Unmanned Surface Vehicle for the Emergency Response Mission of the 'Sanchi' Oil Tanker Collision and Explosion Accident	Pu, Huayan; Liu, Yuan; Luo, Jun; Xie, Shaorong; Peng, Yan; Yang, Yi; Yang, Yang; Li, Xiaomao; Su, Zhou; Gao, Shouwei; Shao, Wenyun; Zhu, Chuang; Ke, Jun; Cui, Jianxiang; Qu, Dong	APPLIED SCIENCES-BASEL	2020
1	Velocity Free Platoon Formation Control for Unmanned Surface Vehicles with Output Constraints and Model Uncertainties	Wang, Duansong; Fu, Mingyu; Ge, Shuzhi Sam; Li, Dongyu	APPLIED SCIENCES-BASEL	2020
1	Multi-under-Actuated Unmanned Surface Vessel Coordinated Path Tracking	Li, Zefang; Liu, Zhong; Zhang, Jianqiang	SENSORS	2020
4	Results from Developments in the Use of a Scanning Sonar to Support Diving Operations from a Rescue Ship	Grzadziel, Artur	REMOTE SENSING	2020
4	Influence of dike-induced morphologic and sedimentologic changes on the benthic ecosystem in the sheltered tidal flats, Saemangeum area, west coast of Korea	Kim, Dohyeong; Jo, Joohee; Kim, Bora; Ryu, Jongseong; Choi, Kyungsik	ENVIRONMENTAL POLLUTION	2020
1	Nonlinear observer design for a robotic unmanned surface vehicle with experiment results	Gu, Nan; Peng, Zhouhua; Wang, Dan; Liu, Lu; Jiang, Yue	APPLIED OCEAN RESEARCH	2020
1	Fast marching square method based intelligent navigation of the unmanned surface vehicle swarm in restricted waters	Tan, Guoge; Zou, Jin; Zhuang, Jiayuan; Wan, Lei; Sun, Hanbing; Sun, Zhiyuan	APPLIED OCEAN RESEARCH	2020
1	Autonomous collision detection and avoidance for ARAGON USV: Development and field tests	Han, Jungwook; Cho, Yonghoon; Kim, Jonghwi; Kim, Jinwhan; Son, Nam-sun; Kim, Sun Young	JOURNAL OF FIELD ROBOTICS	2020
1	Energy efficient path planning for Unmanned Surface Vehicle in spatially-temporally variant environment	Niu, Hanlin; Ji, Ze; Al Savvaris; Tsourdos, Antonios	OCEAN ENGINEERING	2020
1	Disturbance Observer-Based Path Following Control of Unmanned Surface Vessel with Control Input Saturation and Unknown Disturbance	Xie, Yangliu; Luo, Fuyu; Zeng, Jiangfeng; Liang, Xu; Guo, Xiaoye	2019 5TH INTERNATIONAL CONFERENCE ON ENVIRONMENTAL SCIENCE AND MATERIAL APPLICATION	2020
1	Vision-Based Target Tracking for Unmanned Surface Vehicle Considering Its Motion Features	Jin, Jiucai; Zhang, Jie; Liu, Deqing; Shi, Junnan; Wang, Dong; Li, Fangxu	IEEE ACCESS	2020
4	Bottom-Following Control of Underactuated Unmanned Undersea Vehicles With Input Saturation	Yu, Haomiao; Guo, Chen; Han, Yanan; Shen, Zhipeng	IEEE ACCESS	2020
4	Trajectory Planning for Navigation Aiding of Autonomous Underwater Vehicles	Sture, Oystein; Norgren, Petter; Ludvigsen, Martin	IEEE ACCESS	2020
4	A Hybrid Forecasting Model for the Velocity of Hybrid Robotic Fish Based on Back-Propagation Neural Network With Genetic Algorithm Optimization	Shen, Xiaorui; Zheng, Yuxin; Zhang, Runfeng	IEEE ACCESS	2020
1	Research on automatic detection method of infrared marine buoy based on CNN	Liu, Shousheng; Gai, Zhigang; Cao, Lin; Li, Hui; Hu, Ding; Guo, Fengxiang; Qiu, Huimin	SECOND TARGET RECOGNITION AND ARTIFICIAL INTELLIGENCE SUMMIT FORUM	2020
1	Rapid path planning for Unmanned Surface Vessels	Qin, Yueming; Liu, Junxin; Shao, Xing; Duan, Suping	MIPPR 2019: REMOTE SENSING IMAGE PROCESSING, GEOGRAPHIC INFORMATION SYSTEMS, AND OTHER APPLICATIONS	2020
4	Omni-Directional Obstacle Detection for Vehicles Based on Depth Camera	Zhao, Xiangmo; Wu, Huayue; Xu, Zhigang; Min, Haigen	IEEE ACCESS	2020
2	Application of Unmanned Surface Vehicles in Coastal Environments: Bathymetric Survey using a Multibeam Echosounder	Kum, Byung-Cheol; Shin, Dong-Hyeok; Jang, Seok; Lee, Seung Yong; Lee, Jung Han; Moh, TaeJun; Lim, Dong Gil; Do, Jong-Dae; Cho, Jin Hyung	JOURNAL OF COASTAL RESEARCH	2020
1	Adaptive Neural Network Stabilization Control of Underactuated Unmanned Surface Vessels With State Constraints	Hu, Fangfang; Zeng, Chao; Zhu, Gang; Li, Shiling	IEEE ACCESS	2020
4	CONCEPTUAL DESIGN & PROTOTYPE DEVELOPMENT OF A SOLAR-POWERED GROUND ROBOT FOR ENERGY-AUTONOMOUS OPERATION	Behjat, Amir; Collins, Leighton; Hoffman, Andrew; Chidambaran, Sharat; Dhameliya, Maulikkumar; Chowdhury, Souma	PROCEEDINGS OF THE ASME INTERNATIONAL DESIGN ENGINEERING TECHNICAL CONFERENCES AND COMPUTERS AND INFORMATION IN ENGINEERING CONFERENCE, 2019, VOL 5B	2020
2	Control System Design and Thrust Analysis of an Unmanned Surface Cleaning Vessel With a Novel Pump-Valve Propulsion System	Luo, Yaojing; Ai, Jiaoyan; Zheng, Jianwu; Wang, Jufeng	IEEE ACCESS	2020
1	Adaptive Backstepping Sliding Mode Dynamic Positioning System for Pod Driven Unmanned Surface Vessel Based on Cerebellar Model Articulation Controller	Piao, Zaiji; Guo, Chen; Sun, Shuang	IEEE ACCESS	2020
1	Adaptive Sliding Mode Control Design for Nonlinear Unmanned Surface Vessel Using RBFNN and Disturbance-Observer	Chen, Zheng; Zhang, Yougong; Nie, Yong; Tang, Jianzhong; Zhu, Shiqiang	IEEE ACCESS	2020
4	Coarse-to-Fine Classification of Road Infrastructure Elements from Mobile Point Clouds Using Symmetric Ensemble Point Network and Euclidean Cluster Extraction	Wang, Duo; Wang, Jin; Scaioni, Marco; Si, Qi	SENSORS	2020
1	Multichannel adaptive deployment and reliable communication design for unmanned surface vessel	Yin, Qiyu; Lv, Yuezu	INTERNATIONAL JOURNAL OF ADVANCED ROBOTIC SYSTEMS	2020
1	Adaptive Discrete-Time Sliding Mode Control of Brushless DC Motor Servo System for Unmanned Surface Vehicles	Zheng, Zhongjiu; Wang, Ning; Zhao, Hong	CYBER SECURITY INTELLIGENCE AND ANALYTICS	2020
1	Adaptive steering control for an azimuth thrusters-based autonomous vessel	Bibuli, M.; Odetti, A.; Zereik, E.	JOURNAL OF MARINE ENGINEERING AND TECHNOLOGY	2019
1	GPS-level accurate camera localization with HorizonNet	Grelsson, Bertil; Robinson, Andreas; Felsberg, Michael; Khan, Fahad Shahbaz	JOURNAL OF FIELD ROBOTICS	2020
1	Model-free adaptive control method with variable forgetting factor for unmanned surface vehicle control	Liao Yulei; Du Tingpeng; Jiang Quanquan	APPLIED OCEAN RESEARCH	2019
1	FINITE-TIME FORMATION CONTROL OF UNMANNED VEHICLES USING NONLINEAR SLIDING MODE CONTROL WITH DISTURBANCES	Lin, Honggui; Chen, Kang; Lin, Ruiquan	INTERNATIONAL JOURNAL OF INNOVATIVE COMPUTING INFORMATION AND CONTROL	2019
1	Adaptive Navigating Control Based on the Parallel Action-Network ADHDP Method for Unmanned Surface Vessel	Huang, Zhijian; Liu, Xinze; Wen, Jiayi; Zhang, Guichen; Liu, Yihua	ADVANCES IN MATERIALS SCIENCE AND ENGINEERING	2019
2	Autonomous Vehicular Landings on the Deck of an Unmanned Surface Vehicle using Deep Reinforcement Learning	Polvara, Riccardo; Sharma, Sanjay; Wan, Jian; Manning, Andrew; Sutton, Robert	ROBOTICA	2019
1	Learning-Based Task Offloading for Marine Fog-Cloud Computing Networks of USV Cluster	Cui, Kuntao; Lin, Bin; Sun, Wenli; Sun, Wenqiang	ELECTRONICS	2019
1	Roll Motion Prediction of Unmanned Surface Vehicle Based on Coupled CNN and LSTM	Zhang, Wenjie; Wu, Pin; Peng, Yan; Liu, Dongke	FUTURE INTERNET	2019
1	A sea-sky-line detection method based on Gaussian mixture models and image texture features	Yang, Wanhui; Li, Hengyu; Liu, Jingyi; Xie, Shaorong; Luo, Jun	INTERNATIONAL JOURNAL OF ADVANCED ROBOTIC SYSTEMS	2019
1	A Platform of Unmanned Surface Vehicle Swarms for Real Time Monitoring in Aquaculture Environments	Sousa, Daniela; Hernandez, Diego; Oliveira, Francisco; Luis, Miguel; Sargento, Susana	SENSORS	2019
1	A cognitive architecture safety design for safety critical systems	Dreany, Harry H.; Roncace, Robert	RELIABILITY ENGINEERING & SYSTEM SAFETY	2019
4	Assessing plant performance in the Enviratron	Bao, Yin; Zarecor, Scott; Shah, Dylan; Tuel, Taylor; Campbell, Darwin A.; Chapman, Antony V. E.; Imberti, David; Kiekhaefer, Daniel; Imberti, Henry; Luebberstedt, Thomas; Yin, Yanhai; Nettleton, Dan; Lawrence-Dill, Carolyn J.; Whitham, Steven A.; Tang, Lie; Howell, Stephen H.	PLANT METHODS	2019
4	Design and Development of Unmanned Hovercraft	Ganesan, Surendar; Esakki, Balasubramanian	INTERNATIONAL JOURNAL OF MATHEMATICAL ENGINEERING AND MANAGEMENT SCIENCES	2019
4	A New Algorithm to Estimate Chlorophyll-A Concentrations in Turbid Yellow Sea Water Using a Multispectral Sensor in a Low-Altitude Remote Sensing System	Baek, Ji-Yeon; Jo, Young-Heon; Kim, Wonkook; Lee, Jong-Seok; Jung, Dawoon; Kim, Dae-Won; Nam, Jungho	REMOTE SENSING	2019
2	Selection of UUV Type ROV Equipment and Cooperation System with USV Edredon in Protection Tasks of Ports and Critical Objects	Kitowski, Zygmunt	TRANSACTIONS ON MARITIME SCIENCE-TOMS	2019
1	GPS/DVL/MEMS-INS smartphone sensors integrated method to enhance USV navigation system based on adaptive DSFCF	Mostafa, Mohamed Z.; Khater, Hatem A.; Rizk, Mohamed R.; Bahasan, Abdullah M.	IET RADAR SONAR AND NAVIGATION	2019
4	Design, modeling, and verification of a test bench for braking simulation of 1/4 vehicle	Liao, Zeng-Cheng; Bai, Xian-Xu frank; Li, Yang; Deng, Xue-Cai; Sun, Jun	PROCEEDINGS OF THE INSTITUTION OF MECHANICAL ENGINEERS PART D-JOURNAL OF AUTOMOBILE ENGINEERING	2020
1	Neural observer-based path following control for underactuated unmanned surface vessels with input saturation and time-varying disturbance	Wan, Lei; Zeng, Jiangfeng; Li, Yueming; Qin, Hongde; Zhang, Lei; Wang, Jian	INTERNATIONAL JOURNAL OF ADVANCED ROBOTIC SYSTEMS	2019
1	Cooperative tracking of vessel trajectories based on curved dynamic coordinates	Chen, Yuqing; Yu, Shuanghe; Shen, Zhipeng; Guo, Ge	ASIAN JOURNAL OF CONTROL	2019
1	Use of a Weighted ICP Algorithm to Precisely Determine USV Movement Parameters	Naus, Krzysztof; Marchel, Lukasz	APPLIED SCIENCES-BASEL	2019
1	Multi-Behavior Fusion Based Potential Field Method for Path Planning of Unmanned Surface Vessel	Fu Ming-yu; Wang Sha-sha; Wang Yuan-hui	CHINA OCEAN ENGINEERING	2019
1	Information fusion model-free adaptive control algorithm and unmanned surface vehicle heading control	Jiang, Quanquan; Li, Ye; Liao, Yulei; Miao, Yugang; Jiang, Wen; Wu, Haowei	APPLIED OCEAN RESEARCH	2019
1	Robust path-following control based on trajectory linearization control for unmanned surface vehicle with uncertainty of model and actuator saturation	Qiu, Bingbing; Wang, Guofeng; Fan, Yunsheng; Mu, Dongdong; Sun, Xiaojie	IEEJ TRANSACTIONS ON ELECTRICAL AND ELECTRONIC ENGINEERING	2019
4	Design and development of a new portable test setup to study friction and wear	Emami, Anahita; Khaleghian, Seyedmeysam; Bezek, Tyler; Taheri, Saied	PROCEEDINGS OF THE INSTITUTION OF MECHANICAL ENGINEERS PART J-JOURNAL OF ENGINEERING TRIBOLOGY	2020
1	Robust adaptive maneuvering control for an unmanned surface vessel with uncertainties	Huang, Hongyun; Fan, Yunsheng	IEEJ TRANSACTIONS ON ELECTRICAL AND ELECTRONIC ENGINEERING	2019
1	Underwater acoustic communication to an unmanned underwater vehicle with a compact vector sensor array	Han, Xiao; Yin, Jingwei; Tian, Yanan; Sheng, Xueli	OCEAN ENGINEERING	2019
1	Robust adaptive maneuvering control for an unmanned surface vessel with uncertainties	Huang, Hongyun; Fan, Yunsheng	IEEJ TRANSACTIONS ON ELECTRICAL AND ELECTRONIC ENGINEERING	2019
1	Evaluation of some effective parameters on the energy efficiency of on-board photovoltaic array on an unmanned surface vehicle	Makhsoos, Ashkan; Mousazadeh, Hossein; Mohtasebi, Seyed Saeid	SHIPS AND OFFSHORE STRUCTURES	2019
4	Research on discontinuous guidance and hardware-in-the-loop simulation for unmanned underwater vehicle	Shao, Zhiyu; Feng, Shunshan	CLUSTER COMPUTING-THE JOURNAL OF NETWORKS SOFTWARE TOOLS AND APPLICATIONS	2019
4	Nuclear Batteries for Maritime Applications	Hamilton, Ian; Patel, Nisarg	MARINE TECHNOLOGY SOCIETY JOURNAL	2019
1	Path following control of an underactuated unmanned marine vehicle with model asymmetry in the presence of ocean current disturbances	Zhang Lei; Sun Yushan; Zhuang Jiayuan; Wang Bo	INTERNATIONAL JOURNAL OF ADVANCED ROBOTIC SYSTEMS	2019
1	Robust adaptive steering control for unmanned surface vehicle with unknown control direction and input saturation	Wang, Shasha; Fu, Mingyu; Wang, Yuanhui	INTERNATIONAL JOURNAL OF ADAPTIVE CONTROL AND SIGNAL PROCESSING	2019
1	A novel gradient climbing control for seeking the best communication point for data collection from a seabed platform using a single unmanned surface vehicle	Jin, Jiu-cai; Zhang, Jie; Lv, Zhi-chao	FRONTIERS OF INFORMATION TECHNOLOGY & ELECTRONIC ENGINEERING	2019
2	A Novel Autonomous Inspection System of USV for Submarine Buried Pipeline	Gao, Lei; Gu, Hai-Tao; Xu, Hong-li	MARINE TECHNOLOGY SOCIETY JOURNAL	2019
1	Toward the Generation of Mission Plans for Operation of Autonomous Marine Vehicles in Confined Areas	Wheare, Jonathan; Lammas, Andrew; Sammut, Karl	IEEE JOURNAL OF OCEANIC ENGINEERING	2019
1	Unmanned surface vessel heading control of model-free adaptive method with variable integral separated and proportion control	Jiang, Quanquan; Liao, Yulei; Li, Ye; Miao, Yugang; Jiang, Wen; Cheng, Changsheng	INTERNATIONAL JOURNAL OF ADVANCED ROBOTIC SYSTEMS	2019
1	Robust exponential point stabilization control of the high-speed underactuated unmanned marine vehicle with model asymmetry	Dong, Zaopeng; Wang, Yabin; Song, Lifei; Zheng, Mao; Chu, Shixin; Mao, Yunsheng	INTERNATIONAL JOURNAL OF ADVANCED ROBOTIC SYSTEMS	2019
1	Adaptive Energy Control Strategy for a Hybrid Energy Storage System in a DC Micro-Grid of an Unmanned Surface Vehicle	Zheng, Zhongjiu; Xu, Yujia; Wang, Ning; Zhao, Hong	JOURNAL OF ADVANCED COMPUTATIONAL INTELLIGENCE AND INTELLIGENT INFORMATICS	2019
1	An experimental study on vertical motion control of a high-speed planing vessel using a controllable interceptor in waves	Park, Jong-Yong; Choi, Hujae; Lee, Jooho; Choi, Hwiyong; Woo, Joohyun; Kim, Seonhong; Kim, Dong Jin; Kim, Sun Young; Kim, Nakwan	OCEAN ENGINEERING	2019
1	An enhanced path planning method for unmanned surface vehicle based on JPS plus and goalbounding algorithm	Xu, Xiaoqiang; Li, Xiaohan; Zhan, Ao	2019 INTERNATIONAL CONFERENCE ON ADVANCED ELECTRONIC MATERIALS, COMPUTERS AND MATERIALS ENGINEERING (AEMCME 2019)	2019
1	Sensor subsystem design for small unmanned surface vehicle	Kolev, Georgii; Solomevich, Ekaterina; Rodionova, Ekaterina; Kopets, Ekaterina; Rybin, Vyacheslav	3RD INTERNATIONAL CONFERENCE ON INFORMATION PROCESSING AND CONTROL ENGINEERING	2019
1	Research on Trajectory Reconstruction Method Using Automatic Identification System Data for Unmanned Surface Vessel	Shi, Binghua; Su, Yixin; Zhang, Danhong; Wang, Chen; AbouOmar, Mahmoud Samy	IEEE ACCESS	2019
1	Joint Communication and Control for Small Underactuated USV Based on Mobile Computing Technology	Yang, Tingting; Guo, Yuejun; Zhou, Yi; Wei, Siwen	IEEE ACCESS	2019
1	Mission Control Software Architecture for ISR-type Unmanned Surface Vehicle	Yu, Chanwoo; Lee, Jangmyung	2019 19TH INTERNATIONAL CONFERENCE ON CONTROL, AUTOMATION AND SYSTEMS (ICCAS 2019)	2019
1	Battle Management Language for Robotic Systems Experiences from Applications on an UGV and an USV	Seehuus, Rikke Amilde; Mathiassen, Kim; Ruud, Else-Line Malene; Simonsen, Aleksander Skjerlie; Hermansen, Fredrik	MODELLING AND SIMULATION FOR AUTONOMOUS SYSTEMS (MESAS 2018)	2019
1	The MaSTr1325 dataset for training deep USV obstacle detection models	Bovcon, Borja; Muhovic, Jon; Pers, Janez; Kristan, Matej	2019 IEEE/RSJ INTERNATIONAL CONFERENCE ON INTELLIGENT ROBOTS AND SYSTEMS (IROS)	2019
1	LiDAR Based Navigable Region Detection for Unmanned Surface Vehicles	Yao, Xiangtong; Shan, Yunxiao; Li, Jieling; Ma, Donghui; Huang, Kai	2019 IEEE/RSJ INTERNATIONAL CONFERENCE ON INTELLIGENT ROBOTS AND SYSTEMS (IROS)	2019
1	Roboat: An Autonomous Surface Vehicle for Urban Waterways	Wang, Wei; Gheneti, Banti; Mateos, Luis A.; Duarte, Fabio; Ratti, Carlo; Rus, Daniela	2019 IEEE/RSJ INTERNATIONAL CONFERENCE ON INTELLIGENT ROBOTS AND SYSTEMS (IROS)	2019
4	Robonomics as a Blockchain-based Platform for Unmanned Traffic Management of Mobile Vehicles	Kapitonov, Aleksandr; Berman, Ivan; Manaenko, Vadim; Rzhevskiy, Vyacheslav; Bulatov, Vitaly; Zenkin, Artemii	2019 INTERNATIONAL WORKSHOP ON RESEARCH, EDUCATION AND DEVELOPMENT OF UNMANNED AERIAL SYSTEMS (RED UAS 2019)	2019
1	IMPROVED GENETIC ALGORITHMS BASED ON DATA-DRIVEN OPERATORS FOR PATH PLANNING OF UNMANNED SURFACE VEHICLE	Xin, Junfeng; Zhong, Jiabao; Sheng, Jinlu; Li, Penghao; Cui, Ying	INTERNATIONAL JOURNAL OF ROBOTICS & AUTOMATION	2019
1	Real-time Riverbank Line Detection for USV System	Feng, Tianwei; Xiong, Junfeng; Xiao, Jinchao; Liu, Jinqing; He, Yuqing	2019 IEEE INTERNATIONAL CONFERENCE ON MECHATRONICS AND AUTOMATION (ICMA)	2019
1	Fault Classification for Unmanned Surface Vehicles using Supervised Learning Methods	Singh, Rupam; Bhushan, Bharat	2019 INTERNATIONAL CONFERENCE ON POWER ELECTRONICS, CONTROL AND AUTOMATION (ICPECA-2019)	2019
4	Processing Acoustic Data with Siamese Neural Networks for Enhanced Road Roughness Classification	Gabrielli, Leonardo; Ambrosini, Livio; Vesperini, Fabio; Bruschi, Valeria; Squartini, Stefano; Cattani, Luca	2019 INTERNATIONAL JOINT CONFERENCE ON NEURAL NETWORKS (IJCNN)	2019
4	Cybersecurity and Driverless Cars: In Search for a Normative Way of Safety	Some, Evariste; Gondwe, Gregory; Rowe, Evan W.	2019 SIXTH INTERNATIONAL CONFERENCE ON INTERNET OF THINGS: SYSTEMS, MANAGEMENT AND SECURITY (IOTSMS)	2019
1	HIGH-RESOLUTION WATER SEGMENTATION FOR AUTONOMOUS UNMANNED SURFACE VEHICLES: A NOVEL DATASET AND EVALUATION	Taipalmaa, Jussi; Passalis, Nikolaos; Zhang, Honglei; Gabbouj, Moncef; Raitoharju, Jenni	2019 IEEE 29TH INTERNATIONAL WORKSHOP ON MACHINE LEARNING FOR SIGNAL PROCESSING (MLSP)	2019
2	Development of an Unmanned Surface Vehicle for Remote Sediment Sampling with a Van Veen Grab Sampler	Bae, Jun Han; Luo, Shaocheng; Kannan, Shyam Sundar; Singh, Yogang; Lee, Bumjoo; Voyles, Richard M.; Postigo-Malaga, Mauricio; Gonzales Zenteno, Edgar; Paredes Aguilar, Lizbeth; Min, Byung-Cheol	OCEANS 2019 MTS/IEEE SEATTLE	2019
1	Toward Maritime Robotic Simulation in Gazebo	Bingham, Brian; Aguero, Carlos; McCarrin, Michael; Klamo, Joseph; Malia, Joshua; Allen, Kevin; Lum, Tyler; Rawson, Marshall; Waqar, Rumman	OCEANS 2019 MTS/IEEE SEATTLE	2019
4	Cooperative Underwater Survey with an L3Harris Iver UUV and Strategic Robotic Systems FUSION ROV	Brown, Hunter C.; Rodocker, Jesse	OCEANS 2019 MTS/IEEE SEATTLE	2019
2	2018 Unmanned Surface Vehicle (Saildrone) acoustic survey off the west coasts of the United States and Canada	Chu, Dezhang; Parker-Stetter, Sandra; Hufnagle, Lawrence C., Jr.; Thomas, Rebecca; Getsiv-Clemons, Julia; Gauthier, Stephane; Stanley, Chelsea	OCEANS 2019 MTS/IEEE SEATTLE	2019
1	A low-level USV controller incorporating an environmental disturbance observer	Diddams, Michael A.; Dhanak, Manhar R.; Sinisterra, Armando J.	OCEANS 2019 MTS/IEEE SEATTLE	2019
2	Using Unmanned Surface Vehicles for Harbor Security and Disaster Mitigation and Relief	Ferretti, Stephen; Zerbe, Neil	OCEANS 2019 MTS/IEEE SEATTLE	2019
4	Research on the Recycle System for the Unmanned Surface Vehicle Based on the NAR Neural Network	Guo, Tingting; Song, Dalei; Sun, Yuzhen; Zang, Wenchuan	OCEANS 2019 MTS/IEEE SEATTLE	2019
2	Experimental study on collision avoidance procedures for plastic waste cleaner USV	Harada, Kazumasa; Watanabe, Keisuke; Utsunomiya, Koshi; Shimpo, Masatoshi; Dzeng, Ren-Jye	OCEANS 2019 MTS/IEEE SEATTLE	2019
2	Development of an Unmanned Surface Vehicle for Harmful Algae Removal		OCEANS 2019 MTS/IEEE SEATTLE	2019
4	Waypoints on the Voyage to Autonomous Ships	Manley, Justin E.	OCEANS 2019 MTS/IEEE SEATTLE	2019
1	Autonomy system for USV/UUV coordinated sampling	Merrifield, Sophia; Shapiro, Justin; Young, Raymond; St Laurent, Louis; Simmons, Harper; Otero, Mark; Hazard, Joel; Walsh, Evan; Gesiriech, Gannon; Terrill, Eric	OCEANS 2019 MTS/IEEE SEATTLE	2019
1	A Novel Double Layered Weighted Potential Field Framework for Multi-USV Navigation towards Dynamic Obstacle Avoidance in a Constrained Maritime Environment	Mina, Tamzidul; Singh, Yogang; Min, Byung-Cheol	OCEANS 2019 MTS/IEEE SEATTLE	2019
1	Pitching and heaving motion of an unmanned catamaran vehicle in head seas	Prasad, Bijoy; Dhanak, Manhar	OCEANS 2019 MTS/IEEE SEATTLE	2019
1	Performance characterization and comparison of conventional and machine-learning-based techniques for control of a USV	Sinisterra, Armando J.; Verma, Siddhartha; Dhanak, Manhar R.	OCEANS 2019 MTS/IEEE SEATTLE	2019
1	Towards a Real Time Obstacle Detection System for Unmanned Surface Vehicles	Sorial, Mina; Mouawad, Issa; Simetti, Enrico; Odone, Francesca; Casalino, Giuseppe	OCEANS 2019 MTS/IEEE SEATTLE	2019
4	On the Validity of Predicting Wave-induced Loads on a Submerged Body Using the Superposition of Regular Wave Results	Whitmer, Andrew R.; Klamo, Joseph T.; Kwon, Young W.	OCEANS 2019 MTS/IEEE SEATTLE	2019
4	A Diving Autonomous Surface Vehicle for Multi-Robot Research and Development	Woolsey, Max; Kitts, Christopher A.; Amend, Finn	OCEANS 2019 MTS/IEEE SEATTLE	2019
1	Course Control of Unmanned Surface Vehicle Based on Fuzzy Sliding Mode	Wang, Chunxin; Xie, Shaorong; Chen, Huizi; Peng, Yan; Zhang, Dan	2019 IEEE INTERNATIONAL CONFERENCE ON ADVANCED ROBOTICS AND ITS SOCIAL IMPACTS (ARSO)	2019
1	Design of the Power Supply System and the PHM Architecture for Unmanned Surface Vehicle	Zhang, Liqiang; Ji, Zhipeng; Wang, Xiao; Yang, Rui; Liu, Lanjun; Jin, Jiucai	2019 PROGNOSTICS AND SYSTEM HEALTH MANAGEMENT CONFERENCE (PHM-QINGDAO)	2019
1	Design and Implementation of PHM System Framework for Unmanned Surface Vehicles	Zhou, Yiling; Hu, Tao; Yang, Jianjun	2019 PROGNOSTICS AND SYSTEM HEALTH MANAGEMENT CONFERENCE (PHM-QINGDAO)	2019
1	Hierarchical Temporal Memory Based Anomaly Detection for Hydrological Monitoring of Unmanned Surface Vehicle	Luo, Hao; Jia, Shuli; Zhang, Wenxuan	2019 2ND IEEE INTERNATIONAL CONFERENCE ON INFORMATION COMMUNICATION AND SIGNAL PROCESSING (ICICSP)	2019
4	Towards an Embedded and Real-Time Joint Human-Machine Monitoring Framework: Dataset Optimization Techniques for Anomaly Detection	Elia, Rafaella; Plastiras, George; Theocharides, Theocharis	2019 IFIP/IEEE 27TH INTERNATIONAL CONFERENCE ON VERY LARGE SCALE INTEGRATION (VLSI-SOC)	2019
4	NUMERICAL SIMULATIONS OF THE SOIL MOISTURE RETRIEVAL BY MEASURING ANGULAR DEPENDENCE OF THE REFLECTION COEFFICIENT	Voronovich, A.	2019 IEEE INTERNATIONAL GEOSCIENCE AND REMOTE SENSING SYMPOSIUM (IGARSS 2019)	2019
4	PIPELINE SEGMENTATION USING LEVEL-SET METHOD	Leangaramkul, A.; Kasetkasem, T.; Tipsuwan, Y.; Isshiki, T.; Chanwimaluang, T.; Hoonsuwan, P.	2019 IEEE INTERNATIONAL GEOSCIENCE AND REMOTE SENSING SYMPOSIUM (IGARSS 2019)	2019
2	ACCURACY OF SSH MEASUREMENT BY USV EQUIPPED WITH GPS -A COMPARISON WITH THE GPS BUOY	Zhai Wanlin; Yan Longhao; Wang He; Qiao Jiguo; Liang Hao	2019 IEEE INTERNATIONAL GEOSCIENCE AND REMOTE SENSING SYMPOSIUM (IGARSS 2019)	2019
1	4G-based Remote Manual Control for Unmanned Surface Vehicles	Zhu, Xiaohui; Kong, Supeng; Yan, Kai; Yue, Yong	PROCEEDINGS OF THE THIRD INTERNATIONAL CONFERENCE ON COMPUTER SCIENCE AND APPLICATION ENGINEERING (CSAE2019)	2019
1	Joint Communication and Control for Small Underactuated USV Based on Mobile Computing Technology	Yang, Tingting; Guo, Yuejun; Zhou, Yi; Wei, Siwen	IEEE ACCESS	2019
2	A low-cost small unmanned surface vehicle (sUSV) for very high-resolution mapping and monitoring of shallow marine habitats	Raber, George T.; Schill, Steven R.	REMOTE SENSING OF THE OCEAN, SEA ICE, COASTAL WATERS, AND LARGE WATER REGIONS 2019	2019
4	Maritime autonomous surface ships (MASS): implementation and legal issues	Li, Stephen; Fung, K. S.	MARITIME BUSINESS REVIEW	2019
1	Research on Trajectory Reconstruction Method Using Automatic Identification System Data for Unmanned Surface Vessel	Shi, Binghua; Su, Yixin; Zhang, Danhong; Wang, Chen; Abouomar, Mahmoud Samy	IEEE ACCESS	2019
1	A target classification method for unmanned surface vehicle based on extreme learning machines	Wu, Defeng; Yuan, Kexin; Gu, Jiadong; Lin, Honggui	INTERNATIONAL JOURNAL OF MODELLING IDENTIFICATION AND CONTROL	2019
1	Disturbance-Observer-Based Sliding Mode Control Design for Nonlinear Unmanned Surface Vessel With Uncertainties	Chen, Zheng; Zhang, Yougong; Zhang, Youming; Nie, Yong; Tang, Jianzhong; Zhu, Shiqiang	IEEE ACCESS	2019
1	An approximate method for calculating the resistance of a transport ship model	Szelangiewicz, Tadeusz; Zelazny, Katarzyna	SCIENTIFIC JOURNALS OF THE MARITIME UNIVERSITY OF SZCZECIN-ZESZYTY NAUKOWE AKADEMII MORSKIEJ W SZCZECINIE	2019
1	Learn to Navigate: Cooperative Path Planning for Unmanned Surface Vehicles Using Deep Reinforcement Learning	Zhou, Xinyuan; Wu, Peng; Zhang, Haifeng; Guo, Weihong; Liu, Yuanchang	IEEE ACCESS	2019
4	E. L.AKIM's CONTRIBUTION TO THE RUSSIAN SPACE RESEARCH PROGRAM	Borovin, G. K.; Golubev, Yu F.; Zaslavsky, G. S.; Stepanyants, V. A.; Tuchin, A. G.	MATHEMATICA MONTISNIGRI	2019
4	Towards Advancing Diver-Robot Interaction Capabilities	Nad, Dula; Walker, Christopher; Kvasic, Igor; Antillon, Derek Orbaugh; Miskovic, Nikola; Anderson, Iain; Loncar, Ivan	IFAC PAPERSONLINE	2019
2	Towards active self-management of umbilical linking ROV and USV for safer submarine missions	Tortorici, Ornella; Anthierens, Cedric; Hugel, Vincent; Barthelemy, Herve	IFAC PAPERSONLINE	2019
1	Experimental validation of a velocity obstacle based collision avoidance algorithm for unmanned surface vehicles	Cho, Yonghoon; Han, Jungwook; Kim, Jinwhan; Lee, Philyeob; Park, Shin-Bae	IFAC PAPERSONLINE	2019
1	A Higher Order Sliding Mode Controller-Observer for Marine Vehicles	von Ellenrieder, Karl D.; Henninger, Helen C.	IFAC PAPERSONLINE	2019
1	Preparation of Papers for IFAC Conferences & Symposia: Designing a characteristic model-based adaptive path following controller for unmanned surface vehicles	Tao Wei; Zhu Man; Wen Yuangqiao; Xiao Changshi; Zhou Jie	IFAC PAPERSONLINE	2019
4	FRAMEWORK OF AN EVOLUTIONARY MULTI-OBJECTIVE OPTIMISATION METHOD FOR PLANNING A SAFE TRAJECTORY FOR A MARINE AUTONOMOUS SURFACE SHIP	Szlapczynski, Rafal; Ghaemi, Hossein	POLISH MARITIME RESEARCH	2019
2	Design and implementation of a cooperative dual body vehicle	Liang, Yifeng; Xu, Jiangning; Wu, Miao; Chen, Kuihan	PROCEEDINGS OF 2019 IEEE 8TH JOINT INTERNATIONAL INFORMATION TECHNOLOGY AND ARTIFICIAL INTELLIGENCE CONFERENCE (ITAIC 2019)	2019
4	Experimental Results in Bearings-only Tracking using the Sequential Monte-Carlo Probability Hypothesis Density Filter	Jimenez, Jorge; Wolek, Artur; Stilwell, Daniel J.; McMahon, James; Dzikowicz, Benjamin	SIGNAL PROCESSING, SENSOR/INFORMATION FUSION, AND TARGET RECOGNITION XXVIII	2019
1	Robust Nonlinear Multiple Unmanned Surface Vessels Control Against Probabilistic Faults and Time-Varying Delay	Yue, Wei; Guan, Xianhe; Wang, Liyuan	IEEE ACCESS	2019
1	Adaptive Formation Control for Waterjet USV With Input and Output Constraints Based on Bioinspired Neurodynamics	Wang, Duansong; Fu, Mingyu	IEEE ACCESS	2019
1	Dynamic Path Planning Algorithm Based on an Optimization Model	Zhang, Jingjing; Hu, Hongning; Wan, Yuting	SIGNAL AND INFORMATION PROCESSING, NETWORKING AND COMPUTERS (ICSINC)	2019
1	Early Assessment of Drone Fleet Defence in Depth Capabilities for Mission Success	Papakonstantinou, Nikolaos; Bashir, Ahmed Z.; O'Halloran, Bryan; Van Bossuyt, Douglas Lee	2019 ANNUAL RELIABILITY AND MAINTAINABILITY SYMPOSIUM (RAMS 2019) - R & M IN THE SECOND MACHINE AGE - THE CHALLENGE OF CYBER PHYSICAL SYSTEMS	2019
1	A novel image recognition algorithm of target identification for unmanned surface vehicles based on deep learning	He, Wei; Xie, Shuo; Liu, Xinglong; Lu, Tao; Luo, Tianjiao; Sotelo, Miguel Angel; Li, Zhixiong	JOURNAL OF INTELLIGENT & FUZZY SYSTEMS	2019
1	A decoupling controller by hierarchical backstepping method for straight-line tracking of unmanned surface vehicle	Wang, Chunxin; Xie, Shaorong; Chen, Huizi; Peng, Yan; Zhang, Dan	SYSTEMS SCIENCE & CONTROL ENGINEERING	2019
1	Short-range and Long-range Cooperative Communication for Littoral Environment Monitoring	Bennis, I.; Gaugue, A.; Menard, M.	2019 15TH INTERNATIONAL WIRELESS COMMUNICATIONS & MOBILE COMPUTING CONFERENCE (IWCMC)	2019
1	Master-Slave Collaboration System of Unmanned Surface Vehicle and Robotic Fish	Xu, Wanlu; Chen, Feihu	2018 4TH INTERNATIONAL CONFERENCE ON ENVIRONMENTAL SCIENCE AND MATERIAL APPLICATION	2019
1	Design and Development of Novel System for Increasing Range of an Unmanned Underwater Vehicle	Ajith, Abhinav; Rajkumar, Rahul; Shibu, Reuben M.; Ramesh, M.; John, Anish K.	2019 IEEE UNDERWATER TECHNOLOGY (UT)	2019
2	Unmanned seafloor survey system without support vessel and its recent operations in sea trials	Ohki, Takeshi; Nakatani, Takeshi; Nishida, Yuya; Thornton, Blair	2019 IEEE UNDERWATER TECHNOLOGY (UT)	2019
1 and 2	Design and Application of an Autonomous Surface Vehicle with an AI-based Sensing Capability	Tsai, Chia-Ming; Lai, Yi-Horng; Perng, Jau-Woei; Tsui, I-Fong; Chung, Yu-Jen	2019 IEEE UNDERWATER TECHNOLOGY (UT)	2019
4	Design a Web Platform to manage environmental monitoring information to be used in multicriteria evaluations of Green Infrastructures	Gallo, R.; Ristorto, G.; Bojeri, A.; Zorzi, N.; Rinaldi, M. F.; Sauli, G.; Mazzetto, F.	1ST WORKSHOP ON METROLOGY FOR AGRICULTURE AND FORESTRY (METROAGRIFOR)	2019
4	Optimal Maneuvering and Control of Cooperative Vehicles as Case Study for Maritime Applications within Harbors	Zweigel, R.; Gehrt, J. J.; Liu, S.; Roy, S.; Bueskens, C.; Kurowski, M.; Jeinsch, T.; Schubert, A.; Gluch, M.; Simanski, O.; Pairet-Garcia, E.; Siemer, F.; Abel, D.	2019 18TH EUROPEAN CONTROL CONFERENCE (ECC)	2019
1	Adaptive LOS Path Following based on Trajectory Linearization Control for Unmanned Surface Vehicle with Multiple Disturbances and Input Saturation	Qiu, Bingbing; Wang, Guofeng; Fan, Yunsheng; Mu, Dongdong; Sun, Xiaojie	CONTROL ENGINEERING AND APPLIED INFORMATICS	2019
1	A Hybrid Path Planning Algorithm for Unmanned Surface Vehicles in Complex Environment With Dynamic Obstacles	Chen, Zheng; Zhang, Youming; Zhang, Yougong; Nie, Yong; Tang, Jianzhong; Zhu, Shiqiang	IEEE ACCESS	2019
1	A Novel Adaptive Weighted Least Square Support Vector Regression Algorithm-Based Identification of the Ship Dynamic Model	Zhu, Man; Wen, Yuanqiao; Sun, Wuqiang; Wu, Bo	IEEE ACCESS	2019
1	Heading Control of Unmanned Surface Vehicle With Variable Output Constraint Model-Free Adaptive Control Algorithm	Jiang, Quanquan; Liao, Yulei; Li, Ye; Fan, Jiajia; Miao, Yugang	IEEE ACCESS	2019
4	Double-Loop Structure Integral Sliding Mode Control for UUV Trajectory Tracking	Li, Juan; Guo, Hao; Zhang, Honghan; Yan, Zheping	IEEE ACCESS	2019
4	Embodiment of an Aquatic Surface Vehicle in an Omnidirectional Ground Robot	Lennox, Callum; Groves, Keir; Hondru, Vlad; Arvin, Farshad; Gornicki, Konrad; Lennox, Barry	2019 IEEE INTERNATIONAL CONFERENCE ON MECHATRONICS (ICM)	2019
2	An Integrated System for Real-Time Water Monitoring Based on Low Cost Unmanned Surface Vehicles	Garuglieri, Simone; Madeo, Dario; Pozzebon, Alessandro; Zingone, Roberto; Mocenni, Chiara; Bertoni, Duccio	2019 IEEE SENSORS APPLICATIONS SYMPOSIUM (SAS)	2019
1	METHOD OF EMERGENCY COLLISION AVOIDANCE FOR UNMANNED SURFACE VEHICLE (USV) BASED ON MOTION ABILITY DATABASE	Song, Lifei; Chen, Houjing; Xiong, Wenhao; Dong, Zaopeng; Mao, Puxiu; Xiang, Zuquan; Hu, Kai	POLISH MARITIME RESEARCH	2019
1	OUTPUT FEEDBACK ADAPTIVE CONTROL OF DYNAMICALLY POSITIONED SURFACE VESSELS: A DISTURBANCE OBSERVER-BASED CONTROL APPROACH	Homayounzade, Mohamadreza; Alipour, Milad	INTERNATIONAL JOURNAL OF ROBOTICS & AUTOMATION	2019
2	A BATHYMETRIC UNMANNED SURFACE VESSEL FOR EFFECTIVE MONITORING OF UNDERWATER AGGREGATE EXTRACTION FROM THE PERSPECTIVE OF ENGINEERING FACILITIES PROTECTION	Madusiok, Dominik	ARCHIVES OF MINING SCIENCES	2019
4	THE WEQUAL PROJECT: A WEB PLATFORM FOR MULTIDIMENSIONAL EVALUATIONS OF GREEN INFRASTRUCTURES	Gallo, Raimondo; Daglio, Gabriele; Ristorto, Gianluca; Bojeri, Alex; Sauli, Giuliano; Zorzi, Nadia; Mazzetto, Fabrizio	AKTUALNI ZADACI MEHANIZACIJE POLJOPRIVREDE: ZBORNIK RADOVA: ACTUAL TASKS ON AGRICULTURAL ENGINEERING. PROCEEDINGS	2019
4	The development of a low cost UAV-based image acquisition system and the procedure for capturing data in precision agriculture	Tekin, Arif Behic; Fornale, Marco	TURKISH JOURNAL OF AGRICULTURE AND FORESTRY	2019
2	Benefits of using ASV MBES surveys in shallow waters and restriced areas	Iwen, Dominik; Waz, Mariusz	2019 EUROPEAN NAVIGATION CONFERENCE (ENC)	2019
1	The Maneuvering Motion Mode Identification and Analysis of Unmanned Surface Vehicle	Ma, Tianyu; Yang, Songlin; Wang, Shuai	PROCEEDINGS OF THE 11TH INTERNATIONAL CONFERENCE ON COMPUTER MODELING AND SIMULATION (ICCMS 2019) AND 8TH INTERNATIONAL CONFERENCE ON INTELLIGENT COMPUTING AND APPLICATIONS (ICICA 2019)	2019
4	Application of Range Finder by Image Sensor in the Underwater Environment	Enomoto, Eriko; Shimizu, Junji; Koike, Yoshikazu; Masyhuri, Husna; Hashimoto, Yuichi; Morino, Hiroaki; Hirohashi, Noritaka; Shimizu, Etsuro; Sakata, Kunio	2019 INTERNATIONAL CONFERENCE ON ELECTRONICS, INFORMATION, AND COMMUNICATION (ICEIC)	2019
2	Design and Implementation of an Unmanned Surface Vehicle for Oil Spill Handling	Al Maawali, Waleed; Al Naabi, Ahmed; Al Yaruubi, Majid; Saleem, Ashraf; Al Maashri, Ahmed	2019 1ST INTERNATIONAL CONFERENCE ON UNMANNED VEHICLE SYSTEMS-OMAN (UVS)	2019
1	Detection of Sea Surface Obstacle Based on Super-pixel Probabilistic Graphical Model and Sea-sky-line	Zhu, Liting.; Liu, Jingyi.; Chen, Jinbo.	ELEVENTH INTERNATIONAL CONFERENCE ON MACHINE VISION (ICMV 2018)	2019
1	Remote Supervision of an Unmanned Surface Vessel - a Comparison of Interfaces	Lager, Marten; Topp, Elin A.; Malec, Jacek	HRI '19: 2019 14TH ACM/IEEE INTERNATIONAL CONFERENCE ON HUMAN-ROBOT INTERACTION	2019
1	MOTION CONTROL AND COLLISION AVOIDANCE ALGORITHMS FOR UNMANNED SURFACE VEHICLE SWARM IN PRACTICAL MARITIME ENVIRONMENT	Zhuang, Jiayuan; Zhang, Lei; Qin, Zihe; Sun, Hanbing; Wang, Bo; Cao, Jian	POLISH MARITIME RESEARCH	2019
1	A MULTI-LAYERED POTENTIAL FIELD METHOD FOR WATER- JET PROPELLED UNMANNED SURFACE VEHICLE LOCAL PATH PLANNING WITH MINIMUM ENERGY CONSUMPTION	Wang, Shasha; Fu, Mingyu; Wang, Yuanhui; Zhao, Liangbo	POLISH MARITIME RESEARCH	2019
1	CONSENSUS FOR MULTIPLE UNMANNED SURFACE VEHICLE ( MUSV) SYSTEMS WITH MARKOV SWITCHING TOPOLOGIES	Wang, Liyuan; Yue, Wei; Zhang, Rubo	POLISH MARITIME RESEARCH	2019
1	Path Planning for Unmanned Surface Vessels with Multisensor Fusion Design	Chen, Yung Hsiang; Chen, Yung Yue; Yang, Joe Ming	SENSORS AND MATERIALS	2019
1	A Strategy of Robust Control for the Dynamics of an Unmanned Surface Vehicle under Marine Waves and Currents	Velueta, Manuel J.; Rullan, Jose L.; Ruz-Hernandez, Jose A.; Alazki, H.	MATHEMATICAL PROBLEMS IN ENGINEERING	2019
4	The theory model establishment and experiment measure of Lidar ranging signal in large incident angle condition	Ning, Bai; Lai, Jiancheng; Wang, Chunyong; Yan, Wei; Ji, Yunjing; Li, Zhenhua	9TH INTERNATIONAL SYMPOSIUM ON ADVANCED OPTICAL MANUFACTURING AND TESTING TECHNOLOGIES (AOMATT 2018): OPTICAL TEST, MEASUREMENT TECHNOLOGY, AND EQUIPMENT	2019
4	Inspection System for Underwater Structure of Bridge Pier	Ueda, Takumi; Hirai, Hiyoyasu; Fuchigami, Kazuki; Yuki, Ryoma; Jonghyun, Ahn; Yasukawa, Shinsuke; Nishida, Yuya; Ishii, Kazuo; Sonoda, Takashi; Higashi, Katsunori; Tanaka, Katsunori; Ikeda, Tomomasa	ICAROB 2019: PROCEEDINGS OF THE 2019 INTERNATIONAL CONFERENCE ON ARTIFICIAL LIFE AND ROBOTICS	2019
1	Shadow verification-based waterline detection for unmanned surface vehicles deployed in complicated natural environment	Wei, Yangjie; He, Yuqing	INTERNATIONAL JOURNAL OF ADVANCED ROBOTIC SYSTEMS	2018
1	System Architecting and Analysis of Medium Displacement Unmanned Surface Vehicle Sea Hunter As a Surface Warfare Component of Distributed Lethality	Casola, Kristjan J.; Beery, Paul T.; Paulo, Eugene P.	NAVAL ENGINEERS JOURNAL	2018
4	Investigations of Pitch Instability of a Wide-Body Submarine Operating Near the Surface	Beaver, William; Morabito, Michael Gorts	NAVAL ENGINEERS JOURNAL	2018
1	Adaptive sliding-mode path following control system of the underactuated USV under the influence of ocean currents	Chen Xiao; Liu Zhong; Zhang Jianqiang; Zhou Dechao; Dong Jiao	JOURNAL OF SYSTEMS ENGINEERING AND ELECTRONICS	2018
1	Equilibrium point smooth escape algorithm for local route of unmanned surface vehicles	Chen, Jinxin; Liu, Zhong; Zhu, Xufang	JOURNAL OF ENGINEERING-JOE	2018
4	Set-Based Design Impacts on Naval Ship Upgradability	Gray, Alexander W.; Rigterink, Douglas T.	NAVAL ENGINEERS JOURNAL	2018
4	Evaluation Method of Underwater Unmanned Vehicle Sailing Efficiency under Wave Action	Li, Hongwei	JOURNAL OF COASTAL RESEARCH	2018
4	Smart materials applied in a micro remotely piloted aircraft system with morphing wing	Barcala-Montejano, Miguel A.; Rodriguez-Sevillano, Angel A.; Bardera-Mora, Rafael; Garcia-Ramirez, Jaime; de Nova-Trigueros, Joaquin; Urcelay-Oca, Inigo; Morillas-Castellano, Israel	JOURNAL OF INTELLIGENT MATERIAL SYSTEMS AND STRUCTURES	2018
1	Robust composite neural dynamic surface control for the path following of unmanned marine surface vessels with unknown disturbances	Zeng, Jiangfeng; Wan, Lei; Li, Yueming; Zhang, Ziyang; Xu, Yufei; Li, Gongrong	INTERNATIONAL JOURNAL OF ADVANCED ROBOTIC SYSTEMS	2018
1	Optical Signatures and Detection Strategy for a Finned Bioinspired Unmanned Undersea Vehicle	Judd, K. Peter; Novak, Kyle; Geder, Jason D.; Pruessner, Marius; Nichols, Jonathan M.	IEEE JOURNAL OF OCEANIC ENGINEERING	2018
1	Codifying Good Seamanship into Machine Executable Rules	Salter, I. R.	TRANSNAV-INTERNATIONAL JOURNAL ON MARINE NAVIGATION AND SAFETY OF SEA TRANSPORTATION	2018
4	Computational and experimental investigation of fluidic thrust vectoring actuator	Ahmad, S. M.; Siddique, S. M.; Yousaf, M. S.; Tariq, M.; Khan, M. I.; Alam, M. A.	JOURNAL OF THE BRAZILIAN SOCIETY OF MECHANICAL SCIENCES AND ENGINEERING	2018
4	Experimental Investigations of a Generic Swept Unmanned Combat Air Vehicle with Controls	Vicroy, Dan D.; Huber, Kerstin C.; Schuette, Andreas; Rein, Martin; Irving, Jonathan P.; Rigby, Glyn; Loeser, Thomas; Huebner, Andreas-Rene; Birch, Trevor J.	JOURNAL OF AIRCRAFT	2018
2	Mobile distributed temperature sensing of the air-water interface of an aquatic environment with an unmanned surface vehicle	Powers, Craig W.; Predosa, Robert; Higgins, Chad; Schmale, David G., III	JOURNAL OF UNMANNED VEHICLE SYSTEMS	2018
1	A Hybrid Path-Planning Scheme for an Unmanned Surface Vehicle	Wang, Ning; Gao, Yuncheng; Zheng, Zhongjiu; Zhao, Hong; Yin, Jianchuan	2018 8TH INTERNATIONAL CONFERENCE ON INFORMATION SCIENCE AND TECHNOLOGY (ICIST 2018)	2018
1	Nonlinear Observer Design for a Robotic Unmanned Surface Vehicle Using GPS and IMU Measurements with Experimental Results	Zhang, Bin; Peng, Zhouhua; Wang, Dan; Gu, Nan; Liu, Lu; Ren, Shuai	2018 8TH INTERNATIONAL CONFERENCE ON INFORMATION SCIENCE AND TECHNOLOGY (ICIST 2018)	2018
4	DeepFense: Online Accelerated Defense Against Adversarial Deep Learning	Rouhani, Bita Darvish; Samragh, Mohammad; Javaheripi, Mojan; Javidi, Tara; Koushanfar, Farinaz	2018 IEEE/ACM INTERNATIONAL CONFERENCE ON COMPUTER-AIDED DESIGN (ICCAD) DIGEST OF TECHNICAL PAPERS	2018
1 and 2	Hydrographic Multisensory Unmanned Watercraft	Pyrchla, Krzysztof; Pyrchla, Jerzy; Kantak, Tadeusz	2018 BALTIC GEODETIC CONGRESS (BGC-GEOMATICS 2018)	2018
4	The idea, design and current state of development of an Unmanned Submersible Surface Vehicle: USSC SeaDuck	Bachmayer, Ralf; de Young, Brad; Lewis, Ron; Wang, Haibing; MacNeil, Levi; Sobalski, Vincent; Luchino, Federico; Riggs, Neil	2018 IEEE/OES AUTONOMOUS UNDERWATER VEHICLE WORKSHOP (AUV)	2018
4	Field Report: Exploring Fronts with Multiple Robots	Costa, Maria Joao; Pinto, Jose; Dias, Paulo Sousa; Pereira, Joao; Lima, Keila; Ribeiro, Manuel; Sousa, Joao Borges; Lukaczyk, Trent; Mendest, Renato; Tomasino, Maria P.; Magalhaes, Catarina; Belkin, Igor; Lopez-Castejon, Francisco; Gilabert, Javier; Skarpnes, Kay; Ludvigsen, Martin; Rajan, Kanna; Mirmalek, Zara; Chekalyuk, Alex	2018 IEEE/OES AUTONOMOUS UNDERWATER VEHICLE WORKSHOP (AUV)	2018
2	An Autonomous Vehicle Based Open Ocean Lagrangian Observatory	Hobson, Brett W.; Kieft, Brian; Raanan, Ben; Zhang, Yanwu; Birch, James; Ryan, John P.; Chavez, Francisco P.	2018 IEEE/OES AUTONOMOUS UNDERWATER VEHICLE WORKSHOP (AUV)	2018
4	Towards Enhancing the Navigational Accuracy of UUVs Through Collaboration of Multiple Heterogeneous Marine Vehicles	Kapetanovic, Nadir; Nad, Dula; Miskovic, Nikola; Vukic, Zoran	2018 IEEE/OES AUTONOMOUS UNDERWATER VEHICLE WORKSHOP (AUV)	2018
2	Autonomous Surface/Subsurface Survey System Field Trials	Phillips, Alexander B.; Salavasidis, Georgios; Kingsland, Matt; Harris, Catherine; Pebody, Miles; Roper, Daniel; Templeton, Robert; McPhail, Stephen; Prampart, Thomas; Wood, Terry; Taylor, Ruth; Jones, Tiefion	2018 IEEE/OES AUTONOMOUS UNDERWATER VEHICLE WORKSHOP (AUV)	2018
1 and 2	Unmanned Vehicle Autonomy for Long-Duration Surveillance Missions	Rastgoftar, Hossein; Jiang, Jinning; Atkins, Ella	2018 IEEE/OES AUTONOMOUS UNDERWATER VEHICLE WORKSHOP (AUV)	2018
4	Towards autonomous ocean observing systems using Miniature Underwater Gliders with UAV deployment and recovery capabilities	Sollesnes, Erik; Brokstad, Ole Martin; Klaeboe, Rolf; Vagen, Bendik; Carella, Alfredo; Alcocer, Alex; Zolich, Artur Piotr; Johansen, Tor Arne	2018 IEEE/OES AUTONOMOUS UNDERWATER VEHICLE WORKSHOP (AUV)	2018
2	Guidance of an Autonomous Surface Vehicle for Underwater Navigation Aid	Sousa, Jose P.; Ferreira, Bruno M.; Cruz, Nuno A.	2018 IEEE/OES AUTONOMOUS UNDERWATER VEHICLE WORKSHOP (AUV)	2018
1	Real Time Autonomous Maritime Navigation using Dynamic Visibility Graphs	Xidias, Elias; Zissis, Dimitris	2018 IEEE/OES AUTONOMOUS UNDERWATER VEHICLE WORKSHOP (AUV)	2018
1	Autonomous Launch and Recovery Mechanism for USV	Chen, Jiaxin; Cui, Jianxiang; Chen, Haijun; Luo, Jun; Yao, Junfeng	PROCEEDINGS OF 2018 IEEE 4TH INFORMATION TECHNOLOGY AND MECHATRONICS ENGINEERING CONFERENCE (ITOEC 2018)	2018
2	Design of Unmanned Surface Vehicle for Submarine Pipeline Detection	Chen, Haijun; Zhu, Chuan; Chen, Jiaxin; Peng, Yan; Yao, Junfeng	PROCEEDINGS OF 2018 IEEE 4TH INFORMATION TECHNOLOGY AND MECHATRONICS ENGINEERING CONFERENCE (ITOEC 2018)	2018
4	Auto Position Control for Unmanned Underwater Vehicle Based on Double Sliding Mode Loops	Jiang, Wei; Xu, Jian; Kang, Xiao-Feng; Wang, Liang-Liang	INTELLIGENT COMPUTING THEORIES AND APPLICATION, PT I	2018
4	Performance Measurement Outcomes from Planetary Surface Exploration Robots	Insaurralde, Carlos C.; Kaupisch, Thilo	2018 IEEE AEROSPACE CONFERENCE	2018
4	Conceptual Design of a Water-air Amphibious Unmanned Vehicle	Wang, Zhi-jun; Nie, Zong-qiang; Li, Ji-xuan; Ma, Yong	2ND INTERNATIONAL CONFERENCE ON MODELING, SIMULATION AND OPTIMIZATION TECHNOLOGIES AND APPLICATIONS (MSOTA 2018)	2018
1	Design of Unmanned Ship Motion Control System Based on DSP and GPRS	Deng, Hua; Wang, Renqiang; Miao, Keyin; Zhao, Yue; Sun, Jianming; Du, Jiabao	PROCEEDINGS OF THE INTERNATIONAL CONFERENCE ON INFORMATION TECHNOLOGY AND ELECTRICAL ENGINEERING 2018 (ICITEE '18)	2018
1	The Multiple Unmanned Surface Vehicles Cooperative Defense Based on PM-PSO and GA-PSO in the Sophisticated Sea Environment	Liu, Yuan; Wu, Xing; Guo, Yike; Xie, Shaorong; Pu, Huayan; Peng, Yan	NEW TRENDS IN INTELLIGENT SOFTWARE METHODOLOGIES, TOOLS AND TECHNIQUES (SOMET_18)	2018
1	Research on Autonomous Collision Avoidance Method of Unmanned Surface Vessel in the circumstance of Moving Obstacles	Wang, Hongjian; Ban, Xicheng	2018 37TH CHINESE CONTROL CONFERENCE (CCC)	2018
1	Integral Sliding Mode Adaptive Path-following of Unmanned Surface Vessels with Uncertain parameters and Time-varying Disturbances	Yu, Yalei; Guo, Chen; Shen, Haiqing; Zhang, Chuang	2018 37TH CHINESE CONTROL CONFERENCE (CCC)	2018
1	Efficient Steering Control for Long-Term Unmanned Surface Vehicle	Bai, Yiming; Zhao, Yongsheng	2018 37TH CHINESE CONTROL CONFERENCE (CCC)	2018
1	Clustering Algorithm for Autonomous Heading Following of Unmanned Surface Vessel	Shen, Lulu; Jia, Shuli; Luo, Hao	2018 37TH CHINESE CONTROL CONFERENCE (CCC)	2018
4	Research on Vehicle 3D Panoramic Model and Texture Mapping Algorithm Based on Low Distortion and Uniform Field of View	Feng, Shanshan; Jiang, Yongtao; Huang, Haibo; Chen, Liguo	2018 IEEE INTERNATIONAL CONFERENCE ON ROBOTICS AND BIOMIMETICS (ROBIO)	2018
4	Fundamental evaluation of fixed position on water sensing device for long-term monitoring system	Fujii, Yasuyuki; Yamazoe, Hirotake; Lee, Joo-Ho	PROCEEDINGS OF TENCON 2018 - 2018 IEEE REGION 10 CONFERENCE	2018
1 and 2	Remote Monitoring Of A Ship Using Autonomous Surface Vehicle	Mandurkar, Samiksha; Sutar, Devendra; Dabholkar, Nitin	PROCEEDINGS OF THE 2018 SECOND INTERNATIONAL CONFERENCE ON INTELLIGENT COMPUTING AND CONTROL SYSTEMS (ICICCS)	2018
1	Design of Route Planning Wireless Network Control System for Unmanned Surface Vehicle	Zhang, Benren; Xiong, Yong; Mou, Junmin; Zhang, Jia; Yu, Jiajun; Liu, Hongtao	2018 11TH INTERNATIONAL SYMPOSIUM ON COMPUTATIONAL INTELLIGENCE AND DESIGN (ISCID), VOL 1	2018
2	Automated Recovery of the UUV based on the Towed system by the USV	Gu, Hai-tao; Meng, Lingshuai; Bai, Guiqiang; Zhang, Haiting; Lin, Yang; Liu, Shuang	2018 OCEANS - MTS/IEEE KOBE TECHNO-OCEANS (OTO)	2018
2	Wave measurement methodology and validation from Wave Glider unmanned surface vehicles	Jha, Rajesh	2018 OCEANS - MTS/IEEE KOBE TECHNO-OCEANS (OTO)	2018
1	Generic Navigation and Control Methods for Classes of Unmanned Surface Vehicles	Kurowski, Martin; Damerius, Robert; Jeinsch, Torsten	2018 OCEANS - MTS/IEEE KOBE TECHNO-OCEANS (OTO)	2018
4	Monitoring and Communication System Design for A Deep-sea Unmanned Submersible	Liu, Weidong; Li, Guang; Gao, Li'e; Li, Le; Li, Zeyu	2018 OCEANS - MTS/IEEE KOBE TECHNO-OCEANS (OTO)	2018
1	The design of an embedded multi-sensor data fusion system for unmanned surface vehicle navigation based on real time operating system	Liu, Wenwen; Liu, Yuanchang; Song, Rui; Bucknall, Richard	2018 OCEANS - MTS/IEEE KOBE TECHNO-OCEANS (OTO)	2018
2	Combined Small-sized USV and ROV Observation System for Long-term, Large-scale, Spatially Explicit Aquatic Monitoring	Lyu, Bozhi; Zeng, Zheng; Lu, Di; Lian, Lian; Tu, Jiaming; Xiao, Linfeng; Liu, Yiding	2018 OCEANS - MTS/IEEE KOBE TECHNO-OCEANS (OTO)	2018
2	Assessment of a shallow water area in the Tagus estuary using Unmanned Underwater Vehicle (or AUV's), vector-sensors, Unmanned Surface Vehicles, and Hexacopters REX ' 17	Marques, Mario Monteiro; Gatta, Mario; Barreto, Miguel; Lobo, Victor; Matos, Anibal; Ferreira, Bruno; Santos, Paulo J.; Felisberto, Paulo; Jesus, Sergio; Zabel, Frederich; Mendonca, Ricardo; Marques, Francisco	2018 OCEANS - MTS/IEEE KOBE TECHNO-OCEANS (OTO)	2018
2	Unmanned surface vehicle for managing parallel cruising of a multiple AUVs	Nishida, Yuya; Nagano, Kazunori; Kojima, Junichi; Kakami, Hitoshi; Yokota, Saori; Ohki, Takeshi; Nakatani, Takeshi; Thornton, Blair	2018 OCEANS - MTS/IEEE KOBE TECHNO-OCEANS (OTO)	2018
4	An assistance system for manoeuvring vessels in high safety areas	Schubert, Agnes U.; Gluch, Michael; Baldauf, Michael; Kupas, Hendrik; Hagendorf, Olaf; Simanski, Olaf	2018 OCEANS - MTS/IEEE KOBE TECHNO-OCEANS (OTO)	2018
1 and 2	Developing an Energy Effective Autonomous USV for Undertaking Missions at the Highlands of Peru	Song, Rui; Liu, Yuanchang; Balbuena, Jose; Cuellar, Francisco; Bucknall, Richard	2018 OCEANS - MTS/IEEE KOBE TECHNO-OCEANS (OTO)	2018
1	Unmanned Surface Vehicle Course Tracking Control Based on Neural Network and Deep Deterministic Policy Gradient Algorithm	Wang, Yan; Tong, Jie; Song, Tian-Yu; Wan, Zhan-Hong	2018 OCEANS - MTS/IEEE KOBE TECHNO-OCEANS (OTO)	2018
2	Unmanned Surface Vessel for Marine Data Acquisition	Dobref, Vasile; Popa, I.; Popov, P.; Scurtu, I. C.	4TH INTERNATIONAL SCIENTIFIC CONFERENCE SEA-CONF 2018	2018
2	DESIGN CHALLENGES OF A MARITIME MULTIPURPOSE UNMANNED VEHICLE	Lopes, P.; Pires da Silva, P.; Moreira, M.	4TH INTERNATIONAL SCIENTIFIC CONFERENCE SEA-CONF 2018	2018
4	Control of fluctuations of a tethered unmanned-underwater-vehicle	Paifelman, E.; Pepe, G.; La Gala, F.; Carcaterra, A.	PROCEEDINGS OF INTERNATIONAL CONFERENCE ON NOISE AND VIBRATION ENGINEERING (ISMA2018) / INTERNATIONAL CONFERENCE ON UNCERTAINTY IN STRUCTURAL DYNAMICS (USD2018)	2018
4	Collecting and Processing Interaction Data between Tire and Ground by an Instrumented Vehicle	Yamakawa, Junya; Eto, Ryosuke	PROCEEDINGS OF THE 2018 5TH ASIAN CONFERENCE ON DEFENSE TECHNOLOGY (ACDT 2018)	2018
1	Attacking Strategy of Multiple Unmanned Surface Vehicles Based on DAMGWO Algorithm	Pu, Juan; Wu, Xing; Guo, Yike; Xie, Shaorong; Pu, Huayan; Peng, Yan	INFORMATION SYSTEMS: RESEARCH, DEVELOPMENT, APPLICATIONS, EDUCATION (11TH SIGSAND/PLAIS EUROSYMPOSIUM 2018)	2018
4	Algorithm for Determining Road Boundaries in the Radar System of an Unmanned Car	Hanh, Bui Sy; Rastorguev, Vladimir; Schneider, Victor	2018 20TH ANNIVERSARY INTERNATIONAL CONFERENCE ON TRANSPARENT OPTICAL NETWORKS (ICTON)	2018
2	MODELLING THE AUTOMATIC DEPLOYMENT OF OIL-SPILL BOOMS: A SIMULATION SCENARIO FOR SEA CLEANING	Jimenez, Juan; Maria Giron-Sierra, Jose	2018 WINTER SIMULATION CONFERENCE (WSC)	2018
4	Optical Mosaicking and 3D Reconstruction aboard an Underway Iver3 UUV	Brown, Hunter C.; Snyder, Jeffrey Z.	OCEANS 2018 MTS/IEEE CHARLESTON	2018
2	An Ocean Robot With A Winch? Examining a New Dimension in Unmanned Surface Vehicle Capabilities	Carlon, Ryan	OCEANS 2018 MTS/IEEE CHARLESTON	2018
1	Energy-efficient Path Planning and Control Approach of USV Based on Particle Swarm Optimization	Ding, Fuguang; Zhang, Zhaoqing; Fu, Mingyu; Wang, Yuanhui; Wang, Chenglong	OCEANS 2018 MTS/IEEE CHARLESTON	2018
1	Liability issues of Unmanned Surface Vehicles	Ferreira, Fausto; Alves, Joao; Bertolini, Andrea; Bargelli, Elena	OCEANS 2018 MTS/IEEE CHARLESTON	2018
2	Using an USV for Automatic Deployment of a Boom Around a Ship: Simulation and Scale Experiment	Giron-Sierra, Jose M.; Jimenez, Juan F.	OCEANS 2018 MTS/IEEE CHARLESTON	2018
4	Development of a Small, Low-Cost, Networked Buoy for Persistent Ocean Monitoring and Data Acquisition	Laun, L. T. Alexander; Pittman, E. N. S. Elizabeth	OCEANS 2018 MTS/IEEE CHARLESTON	2018
2	Autonomous Unmanned Surface Vehicles (USV): A Paradigm Shift for Harbor Security and Underwater Bathymetric Imaging	Rowley, Jack	OCEANS 2018 MTS/IEEE CHARLESTON	2018
1	On the sea trial test for the validation of an autonomous collision avoidance system of unmanned surface vehicle, ARAGON	Son, Nam-sun; Kim, Sun-Young	OCEANS 2018 MTS/IEEE CHARLESTON	2018
2	Containerized Autonomous Marine Environmental Laboratory - Enhancing Coastal Resiliency with New Technologies	Ziegwied, Andrew	OCEANS 2018 MTS/IEEE CHARLESTON	2018
2	Ocean Plume Tracking with Unmanned Surface Vessels: Algorithms and Experiments	Fahad, Muhammad; Guo, Yi; Bingham, Brian; Krasnosky, Kristopher; Fitzpatrick, Laura; Sanabria, Fernando A.	2018 13TH WORLD CONGRESS ON INTELLIGENT CONTROL AND AUTOMATION (WCICA)	2018
1	Sliding-mode Dynamic Surface Adaptive Path-following of Unmanned Vessels with Dynamic Uncertainties and Disturbances	Yu, Yalei; Guo, Chen; Shen, Haiqing; Zhang, Chuang	2018 13TH WORLD CONGRESS ON INTELLIGENT CONTROL AND AUTOMATION (WCICA)	2018
4	TURNABILITY OF A SMALL UGV WITH INDIVIDUAL WHEEL SKID-STEERING ON SOFT TERRAIN	Zhang, Siyuan; Vantsevich, Vladimir V.	PROCEEDINGS OF THE ASME INTERNATIONAL DESIGN ENGINEERING TECHNICAL CONFERENCES AND COMPUTERS AND INFORMATION IN ENGINEERING CONFERENCE, 2018, VOL 3	2018
4	Effects of Leading Edge Enlargement on the Primary Vortex of Blunt-Edged Delta Wing VFE-2 Profile	Said, Mazuriah; Mat, Shabudin; Mansor, Shuhaimi; Ali, Airi	ACTA POLYTECHNICA HUNGARICA	2018
1	Parallel Docking Problem for Unmanned Surface Vehicles	Yilmaz, Ismail Cagdas; Ahiska, Kenan; Leblebicioglu, Mehmet Kemal	2018 15TH INTERNATIONAL CONFERENCE ON CONTROL, AUTOMATION, ROBOTICS AND VISION (ICARCV)	2018
1	A Hybrid Path Optimization Method of USV with Underwater Acoustic Communication Constraint	Xu, Tonghua; Wang, Nan	2018 CHINESE AUTOMATION CONGRESS (CAC)	2018
1	A Research on Rapid Reconstruction of Water Environment for USV	Liu, Hao; Zhao, Wei; Lin, Hui	2018 CHINESE AUTOMATION CONGRESS (CAC)	2018
1	The Design of Gain Scheduling PID Controller of the USV Course Control System	Zhao Peimin; Zhang Huajun; Tong Xinchi	2018 CHINESE AUTOMATION CONGRESS (CAC)	2018
1	A Research on Intelligent Obstacle Avoidance for Unmanned Surface Vehicles	Tong Xinchi; Zhang Huajun; Chen Wenwen; Zhao Peimin; Leng Zhiwen; Cheng Kai	2018 CHINESE AUTOMATION CONGRESS (CAC)	2018
1	Adaptive steering control system of the USV with friction compensation	Wan, Lili; Zhang, Chun; Chen, Yan	2018 CHINESE AUTOMATION CONGRESS (CAC)	2018
1	State Error PCH Trajectory Tracking Control of an Unmanned Surface Vehicle	Lv, Chengxing; Yu, Haisheng; Xu, Tao; Chi, Jieru; Jiang, Huilue; Li, Lei	2018 CHINESE AUTOMATION CONGRESS (CAC)	2018
1	Blade-Type Crawler Capable of Running on the Surface of Water as Bio-inspired by a Basilisk Lizard	Yamada, Yasuyuki; Nakamura, Taro	2018 IEEE/RSJ INTERNATIONAL CONFERENCE ON INTELLIGENT ROBOTS AND SYSTEMS (IROS)	2018
2	The Design of an VIAM-USV1000 Unmanned Surface Vehicle for Environmental Monitoring Applications	Ngoc-Huy Tran; Tu-Cuong Nguyen; Van-Tao Tran; Vuong-Chi Nguyen; Thanh-Nam Nguyen	PROCEEDINGS OF 2018 4TH INTERNATIONAL CONFERENCE ON GREEN TECHNOLOGY AND SUSTAINABLE DEVELOPMENT (GTSD)	2018
1 and 2	Design Adaptive Controller and Guidance System of an Unmanned Surface Vehicle for Environmental Monitoring Applications	Ngoc-Huy Tran; Nguyen-Nhut-Thanh Pham	PROCEEDINGS OF 2018 4TH INTERNATIONAL CONFERENCE ON GREEN TECHNOLOGY AND SUSTAINABLE DEVELOPMENT (GTSD)	2018
1	Composite Trajectory Tracking Control of Unmanned Surface Vehicles with Disturbances and Uncertainties	Wang, Ning; Guo, Shaofan; Yin, Jianchuan; Zheng, Zhongjiu; Zhao, Hong	PROCEEDINGS OF 2018 IEEE INTERNATIONAL CONFERENCE ON REAL-TIME COMPUTING AND ROBOTICS (IEEE RCAR)	2018
1	Sea Surface Object Recognition Under the Low-Light Environment	Yue, Zihan; Shen, Liang; Lin, Wei; Lv, Wu; Liu, Shihao; Geng, Tao; Ma, Jie	INTELLIGENT ROBOTICS AND APPLICATIONS (ICIRA 2018), PT II	2018
1	Complex Water Surface Segmentation with RGBP-FCN	Liu, Shihao; Chen, Quan; Yue, Zihan; Ma, Jie	INTELLIGENT ROBOTICS AND APPLICATIONS (ICIRA 2018), PT II	2018
1	Adaptive Event Driven Framework for Real Time Multi-Agent Missions	Bonache-Seco, J. A.; Lopez-Orozco, J. A.; Besada Portas, Eva; Risco Martin, Jose L.	PROCEEDINGS OF THE 2018 IEEE/ACM 22ND INTERNATIONAL SYMPOSIUM ON DISTRIBUTED SIMULATION AND REAL TIME APPLICATIONS (DS-RT)	2018
4	ENERGY EQUIPMENT OF UNMANNED MARINE MULTIPURPOSE PLATFORM	Titov, Alexey V.; Pavlov, Akim V.; Chanchikov, Vasiliy A.; Selivanov, Nikolai V.	MARINE INTELLECTUAL TECHNOLOGIES	2018
2	Automatic Water Sample Distribution System for USV Operation	Lu, Bizhou; Qu, Dong; Yang, Guigeng; Xiao, Yulong; Peng, Yan; Yao, Junfeng	PROCEEDINGS OF 2018 IEEE 3RD ADVANCED INFORMATION TECHNOLOGY, ELECTRONIC AND AUTOMATION CONTROL CONFERENCE (IAEAC 2018)	2018
2	Design and Implementation of Unmanned Surface Vehicle for Water Quality Monitoring	Cao, Huiru; Guo, Zhongwei; Gu, Yucheng; Zhou, Jiaxin	PROCEEDINGS OF 2018 IEEE 3RD ADVANCED INFORMATION TECHNOLOGY, ELECTRONIC AND AUTOMATION CONTROL CONFERENCE (IAEAC 2018)	2018
4	Research on Bottom Drag Prevention for an Unmanned Deepwater Collection	Xiao, Yu-long; Zhu, Chuan; Yao, Jun-feng; Peng, Yan; Yang, Gui-geng; Cheng, Qi-xing	PROCEEDINGS OF 2018 IEEE 3RD ADVANCED INFORMATION TECHNOLOGY, ELECTRONIC AND AUTOMATION CONTROL CONFERENCE (IAEAC 2018)	2018
2	Design and Analysis of an Oil-contained Water Sampling Device for Unmanned Surface Vehicle	Yang, Guigeng; Wu, Xiang; Chen, Jiaxin; Lu, Bizhou; Chen, Haijun; Zhu, Chuan	PROCEEDINGS OF 2018 IEEE 3RD ADVANCED INFORMATION TECHNOLOGY, ELECTRONIC AND AUTOMATION CONTROL CONFERENCE (IAEAC 2018)	2018
1	Line-of-Sight Path Following of an Underactuated USV Exposed to Ocean Currents using Cascaded Theorem	Huang, Haibin; Li, Yanan; Zhuang, Yufei; Gong, Mian; Sharma, Sanjay; Xu, Dianguo	2018 WRC SYMPOSIUM ON ADVANCED ROBOTICS AND AUTOMATION (WRC SARA)	2018
1	SELECTION OF AN AUTONOMOUS UNMANNED SURFACE VEHICLE BODY SHAPE BY USING MODERN MEANS OF COMPUTATIONAL FLUID DYNAMICS	Lavrinenko, Akim, V; Ermolaeva, Elena, V; Frank, Maksim O.; Ovchinnikov, Kirill D.; Tryaskin, Nikita, V	MARINE INTELLECTUAL TECHNOLOGIES	2018
4	A Study on Design of Torque Motor for Drone Gimbal System	Lee, Jae-Kwang; Jung, Dong-Hoon; Kim, Hyun-Woo; Park, Yeji; Min, Young Geun; Ko, Kwang-Cheol; Kim, Sol; Park, Wonkyung; Lee, Ju	2018 21ST INTERNATIONAL CONFERENCE ON ELECTRICAL MACHINES AND SYSTEMS (ICEMS)	2018
2	Design and Mechanical Analysis of a Deepwater Sample Collection for Double-Body Unmanned Surface Vehicle	Liu, Yimin; Xiao, Yulong; Zhang, Zuhao; Pu, Huayan; Peng, Yan; Xie, Shaorong; Luo, Jun	2018 3RD INTERNATIONAL CONFERENCE ON ROBOTICS AND AUTOMATION ENGINEERING (ICRAE)	2018
1	Robust Control for the Dynamics of an Unmanned Surface Vehicle Under the Perturbations (Marine Waves and Currents)	Velueta Guzman, Manuel J.; Rullan Lara, Jose L.; Hernandez, Jose A. Ruz; Alazki, Hussain	2018 15TH INTERNATIONAL CONFERENCE ON ELECTRICAL ENGINEERING, COMPUTING SCIENCE AND AUTOMATIC CONTROL (CCE)	2018
1	Implementation of a measurement system for the attitude, heading and position of a USV using IMUs and GPS	Ccolque-Churquipa, Alexander; Cutipa-Luque, Juan C.; Yanyachi Aco-Cardenas, Daniel	2018 IEEE ANDESCON	2018
1	Wave Direction Detection Method Based on monocular Vision	Zhang, Cheng; Wang, Jianhua; Zheng, Xiang; Wen, Xiangxin; Zhang, Shanjia; Zhao, Minghui	2018 INTERNATIONAL SYMPOSIUM IN SENSING AND INSTRUMENTATION IN IOT ERA (ISSI)	2018
1	An Energy-saving Control Method for Path Following of An Unmanned Surface Vehicle in Wave Field	Zhang, Shanjia; Wang, Jianhua; Wen, Xiangxin; Zhao, Minghui; Zhang, Cheng; Cong, Xiaoyi	2018 INTERNATIONAL SYMPOSIUM IN SENSING AND INSTRUMENTATION IN IOT ERA (ISSI)	2018
1	Implementation of an Integrated Navigation, Guidance and Control System for an Unmanned Surface Vehicle	Wang, Ning; Gao, Yuncheng; Weng, Yongpeng; Zheng, Zhongjiu; Zhao, Hong	PROCEEDINGS OF 2018 TENTH INTERNATIONAL CONFERENCE ON ADVANCED COMPUTATIONAL INTELLIGENCE (ICACI)	2018
1	Research on Consensus Algorithm in Coordinated Control of Unmanned Surface Vehicles	Cao, Xuhang; Zhang, Qingyong; Zheng, Kanghua; Zhang, Huajun	PROCEEDINGS 2018 33RD YOUTH ACADEMIC ANNUAL CONFERENCE OF CHINESE ASSOCIATION OF AUTOMATION (YAC)	2018
4	A search for the optimal file transfer protocol from surfaced UUVs to UAV relays and beyond	Cutler, Scott	GROUND/AIR MULTISENSOR INTEROPERABILITY, INTEGRATION, AND NETWORKING FOR PERSISTENT ISR IX	2018
1	On Fusion Algorithm of Infrared and Radar Target Detection and Recognition of Unmanned Surface Vehicle	Dai, Xuefeng; Wang, Jiazhi; Li, Dahui	JOURNAL OF APPLIED SCIENCE AND ENGINEERING	2018
1	The Bioinspired Model-Based Hybrid Sliding-Mode Formation Control for Underactuated Unmanned Surface Vehicles	Fu, Mingyu; Wang, Duansong	JOURNAL OF CONTROL SCIENCE AND ENGINEERING	2018
1	Secured Architecture for Unmanned Surface Vehicle Fleets Management and Control	Laso, Pedro Merino; Brosset, David; Giraud, Marie-Annick	2018 16TH IEEE INT CONF ON DEPENDABLE, AUTONOM AND SECURE COMP, 16TH IEEE INT CONF ON PERVAS INTELLIGENCE AND COMP, 4TH IEEE INT CONF ON BIG DATA INTELLIGENCE AND COMP, 3RD IEEE CYBER SCI AND TECHNOL CONGRESS (DASC/PICOM/DATACOM/CYBERSCITECH)	2018
4	Road-Feature-Based Multiparameter Road Complexity Calculation Model of Off-Road Environment	Zhao, Yanan; Li, Zhiwei; Gao, Li; Xiong, Jian	MATHEMATICAL PROBLEMS IN ENGINEERING	2018
1	Underwater Acoustic Communication Quality Evaluation Model Based on USV	Lv, Zhichao; Zhang, Jie; Jin, Jiucai; Li, Qi; Liu, Lanjun; Zhang, Pengcheng; Gao, Baoru	SHOCK AND VIBRATION	2018
1	AN ANALYTICAL MODEL STUDY OF A FLAPPING HYDROFOIL FOR WAVE PROPULSION	Lopes, D. B. S.; Falcao de Campos, J. A. C.; Sarmento, A. J. N. A.	PROCEEDINGS OF THE ASME 37TH INTERNATIONAL CONFERENCE ON OCEAN, OFFSHORE AND ARCTIC ENGINEERING, 2018, VOL 11A	2018
4	COMPARISON OF WAVE-INDUCED LOADS ON A NEAR SURFACE SLENDER BODY FROM INVISCID FLOW LINEAR SOLUTION AND AN EXPERIMENTAL MODEL TEST	Turner, Travis M.; Klamo, Joseph T.; Kwon, Young W.	PROCEEDINGS OF THE ASME 37TH INTERNATIONAL CONFERENCE ON OCEAN, OFFSHORE AND ARCTIC ENGINEERING, 2018, VOL 7A	2018
1 and 2	Intact stability and seakeeping characteristics of autonomous surface vehicle (asv) using swath hullform to support bathymetry survey activities on the coastal area	Zakki, Ahmad Fauzan; Triwiyatno, Aris; Sasmito, Bandi; Nubly, Muhammad H.	5TH INTERNATIONAL SEMINAR ON OCEAN AND COASTAL ENGINEERING, ENVIRONMENTAL AND NATURAL DISASTER MANAGEMENT (ISOCEEN 2017)	2018
4	Metal Detection Sensor Using Energy Harvesting Power Source	Choi, Kyoo Nam	PROCEEDINGS OF THE 9TH INTERNATIONAL CONFERENCE ON THERMOFLUIDS 2017 (THERMOFLUID 2017)	2018
1 and 2	Gaussian Process Adaptive Sampling using the Cross-Entropy Method for Environmental Sensing and Monitoring	Tan, Yew Teck; Kunapareddy, Abhinav; Kobilarov, Marin	2018 IEEE INTERNATIONAL CONFERENCE ON ROBOTICS AND AUTOMATION (ICRA)	2018
4	Practical Experience towards Robust Underwater Navigation	Bibuli, Marco; Zereik, Enrica; Bruzzone, Gabriele; Caccia, Massimo; Ferretti, Roberta; Odetti, Angelo	IFAC PAPERSONLINE	2018
4	A Finite-Time Disturbance Observer Based Full-Order Terminal Sliding-Mode Controller for Manned Submersible with Disturbances	Fang, Xing; Liu, Fei	MATHEMATICAL PROBLEMS IN ENGINEERING	2018
1	The Improved Hill Encryption Algorithm towards the Unmanned Surface Vessel Video Monitoring System Based on Internet of Things Technology	Yang, Tingting; Li, Yangyang; Lai, Chengzhe; Dong, Jie; Xia, Minghua	WIRELESS COMMUNICATIONS & MOBILE COMPUTING	2018
1	Parametric system identification of catamaran for improving controller design	Timpitak, Surasak; Prempraneerach, Pradya; Pengwang, Eakkachai	8TH TSME-INTERNATIONAL CONFERENCE ON MECHANICAL ENGINEERING (TSME-ICOME 2017)	2018
1	Research on the Legal Status of Unmanned Surface Vehicle	Bi, Huaxiong; Gao, Chao; Ma, Yong	3RD ANNUAL INTERNATIONAL CONFERENCE ON INFORMATION SYSTEM AND ARTIFICIAL INTELLIGENCE (ISAI2018)	2018
1	Performance Analysis of Cooperative Positioning System	Yu, Fei; Fan, Shiwei; Li, Qian; Pan, Jiang; Wang, Zicheng	2018 IEEE/ION POSITION, LOCATION AND NAVIGATION SYMPOSIUM (PLANS)	2018
4	Wing configuration on Wind Tunnel Testing of an Unmanned Aircraft Vehicle	Daryanto, Yanto; Purwono, Joko; Subagyo	5TH INTERNATIONAL SEMINAR ON AEROSPACE SCIENCE AND TECHNOLOGY	2018
1	Design Multi-Sides System Unmanned Surface Vehicle (USV) Rocket	Syam, Rafiudin; Sutresman, Onny; Mappaita, Abdullah; Amiruddin; Wiranata, Ardi	INTERNATIONAL CONFERENCE ON NUCLEAR ENERGY TECHNOLOGIES AND SCIENCES (ICONETS 2017)	2018
4	Wind tunnel tests of the inverted joined wing and a comparison with CFD results	Galinski, Cezary; Krysztofiak, Grzegorz; Miller, Marek; Ruchala, Pawel; Kalski, Marek; Lis, Mateusz; Dziubinski, Adam; Bogdanski, Krzysztof; Stefanek, Lukasz; Hajduk, Jaroslaw	AIRCRAFT ENGINEERING AND AEROSPACE TECHNOLOGY	2018
1	Cooperative Path Planning for Multi-USV Based on Improved Artificial Bee Colony Algorithm	Cao, Lu; Chen, Qiwei	MIPPR 2017: REMOTE SENSING IMAGE PROCESSING, GEOGRAPHIC INFORMATION SYSTEMS, AND OTHER APPLICATIONS	2018
1	A Survey of Advanced Marine Communication and Navigation Technologies: Developments and Strategies	Andriana, Sarkodie Pokuaa; Zhang Zhenkai; Ben-Bright, Benuwa; Ghansah, Benjamin; Ansah, Ernest	INTERNATIONAL JOURNAL OF ENGINEERING RESEARCH IN AFRICA	2018
1	Mixed Design of SPAD array based TOF for Depth Camera and Unmanned Vehicle Applications	Shi, Weiwei; Pan, An	15TH INTERNATIONAL CONFERENCE ON SYNTHESIS, MODELING, ANALYSIS AND SIMULATION METHODS AND APPLICATIONS TO CIRCUIT DESIGN (SMACD 2018)	2018
1	Performance of PSO Based Classical and Fractional PID Controllers for an Unmanned Surface Vehicle	Ayas, Mustafa Sinasi; Sahin, Erdinc; Altas, Ismail Hakki	2018 26TH SIGNAL PROCESSING AND COMMUNICATIONS APPLICATIONS CONFERENCE (SIU)	2018
1	Visualization and Collision Risk Assessment of Real Ships in a Mixed-Reality Environment using Live Automatic Identification System (AIS) Data	Fossen, Sindre; Bye, Robin T.; Osen, Ottar	2018 2ND EUROPEAN CONFERENCE ON ELECTRICAL ENGINEERING AND COMPUTER SCIENCE (EECS 2018)	2018
4	Extended Kalman Filter Design and Motion Prediction of Ships using Live Automatic Identification System (AIS) Data	Fossen, Sindre; Fossen, Thor I.	2018 2ND EUROPEAN CONFERENCE ON ELECTRICAL ENGINEERING AND COMPUTER SCIENCE (EECS 2018)	2018
2	Proof of Concept for the Use of Small Unmanned Surface Vehicle in Built Environment Management	Shojaei, Alireza; Moud, Hashem Izadi; Flood, Ian	CONSTRUCTION RESEARCH CONGRESS 2018: CONSTRUCTION INFORMATION TECHNOLOGY	2018
1	Development of an Autonomous Unmanned Surface Vehicle with Object Detection Using Deep Learning	Chen, Yu; Chen, Xudong; Zhu, Junji; Lin, Feng; Chen, Ben M.	IECON 2018 - 44TH ANNUAL CONFERENCE OF THE IEEE INDUSTRIAL ELECTRONICS SOCIETY	2018
4	Battery-Powered Autonomous Robot for Cleaning of Dusty Photovoltaic Panels in Desert Zones	Antonelli, Michele Gabrio; Zobel, Pierluigi Beomonte; De Marcellis, Andrea; Palange, Elia	MECHATRONICS 2017: RECENT TECHNOLOGICAL AND SCIENTIFIC ADVANCES	2018
1	Analysis of GNSS Measurement Error on High Latitude Precise Maritime Navigation	Park, SulGee; Kim, Don; Fang, Tae Hyun; Park, Sang Hyun	PROCEEDINGS OF THE 31ST INTERNATIONAL TECHNICAL MEETING OF THE SATELLITE DIVISION OF THE INSTITUTE OF NAVIGATION (ION GNSS+ 2018)	2018
4	A Post-Swirl Maneuvering Propulsor Application to Undersea Vehicles	Huyer, Stephen A.	IEEE JOURNAL OF OCEANIC ENGINEERING	2017
4	Design and Fabrication of Multifunctional Aerodynamic Structures using Additive Manufacturing	Nino, G. F.; Wadhwa, A.; Spencer, F.; Breidenthal, R.	SAMPE JOURNAL	2017
1	The USV Path Following Controller Design	Bai, Yiming; Zhao, Yongsheng; Li, Tieshan	2017 4TH INTERNATIONAL CONFERENCE ON INFORMATION, CYBERNETICS AND COMPUTATIONAL SOCIAL SYSTEMS (ICCSS)	2017
4	Online Maximum Efficiency Control Based on MRAS for Unmanned Air Vehicle Surface-Mounted High-Speed PMSM	Li, Mengqiu; Tan, Haibo; Cai, Hui; Gao, Yibo; Li, Yaqiang; Li, Shechuan	2017 CHINESE AUTOMATION CONGRESS (CAC)	2017
1	Recognition of the light buoy for scan the code mission in 2016 Maritime RobotX Challenge	Jung, Woohyun; Woo, Joohyun; Kim, Nakwan	2017 IEEE UNDERWATER TECHNOLOGY (UT)	2017
1	The Cooperative Defense Strategy by Multi-USVs	Liu, Yuan; Wu, Xing; Guo, Yike; Xie, Shaorong; Pu, Huayan; Peng, Yan	NEW TRENDS IN INTELLIGENT SOFTWARE METHODOLOGIES, TOOLS AND TECHNIQUES	2017
1	The Cooperative Defense System by Team of USVs in Complicated Sea Environment	Wu, Xing; Liu, Yuan; Guo, Yike; Xie, Shaorong; Pu, Huayan; Peng, Yan	NEW TRENDS IN INTELLIGENT SOFTWARE METHODOLOGIES, TOOLS AND TECHNIQUES	2017
1	Persistent automatic tracking of multiple surface vessels by fusing radar and lidar	Han, Jungwook; Kim, Jinwhan; Son, Nam-sun	OCEANS 2017 - ABERDEEN	2017
1	The Path Following Controller Design of Unmanned Surface Vehicle	Zhao, Yongsheng; Bai, Yiming	PROCEEDINGS OF THE 2017 12TH IEEE CONFERENCE ON INDUSTRIAL ELECTRONICS AND APPLICATIONS (ICIEA)	2017
1	Waterline Separation in Optical Images with Heavy Complicated Shadows	Wei, Yangjie; Duan, Xiaoying; He, Yuqing	2017 IEEE 7TH ANNUAL INTERNATIONAL CONFERENCE ON CYBER TECHNOLOGY IN AUTOMATION, CONTROL, AND INTELLIGENT SYSTEMS (CYBER)	2017
2	Design of a mobile hydrological data measurement system	Liu, Yunping; Wang, Tianmiao; Dai, Fenfen	3RD INTERNATIONAL CONFERENCE ON ADVANCES IN ENERGY, ENVIRONMENT AND CHEMICAL ENGINEERING	2017
4	Contribution of the Rear Admiral Professor Zygmunt Kitowski in the development of the unmanned surface vehicles Celebration of 70th Birthday	Zak, Bogdan; Zaleska-Fornal, Agata	JOURNAL OF MARINE ENGINEERING AND TECHNOLOGY	2017
1	Dynamic Obstacles Trajectory Prediction and Collision Avoidance of USV	Wang, Yuanhui; Shen, Jiaying; Liu, Xiangbo	PROCEEDINGS OF THE 36TH CHINESE CONTROL CONFERENCE (CCC 2017)	2017
1	On Model Parameter Identification and Trajectory Tracking Control for USV Based on Backstepping	Fan Yunsheng; Sun Yutong; Wang Guofeng	PROCEEDINGS OF THE 36TH CHINESE CONTROL CONFERENCE (CCC 2017)	2017
1	Bio-inspired Trajectory Tracking Algorithm based on SFLOS for USV	Fu, Mingyu; Zhou, Li; Xu, Yujie	PROCEEDINGS OF THE 36TH CHINESE CONTROL CONFERENCE (CCC 2017)	2017
1	A steering occasion strategy for local collision avoidance of an Unmanned Surface Vehicle in a complex environment	Wang, Dong; Zhang, Jie; Jin, Jiucai; Shao, Feng; Mao, Xingpeng	PROCEEDINGS OF THE 36TH CHINESE CONTROL CONFERENCE (CCC 2017)	2017
1	Information Consensus-Based Formation Control of Unmanned Surface Vehicles	Liu, Zhao-Qing; Wang, Yu-Long; Yang, Xiao-Fei	PROCEEDINGS OF THE 36TH CHINESE CONTROL CONFERENCE (CCC 2017)	2017
1	Sliding Mode Based ADRC for Curved Path Following of Unmanned Surface Vessels	Huang, Hongyun; Fan, Yunsheng	2017 CHINESE AUTOMATION CONGRESS (CAC)	2017
1	Guidance law design for synchronized path following of underactuated unmanned surface vehicles based on distributed observers	Liu, Lu; Gu, Nan; Jiang, Yue; Wang, Dan; Peng, Zhouhua	2017 CHINESE AUTOMATION CONGRESS (CAC)	2017
1	Unmanned Surface Vessels Path Following System Based on Adaptive RBFNN	Wang Changshun; Pan Weigang; Zhang Huang	2017 CHINESE AUTOMATION CONGRESS (CAC)	2017
1	Adaptive Fuzzy Output Regulation for Formation Control of Unmanned Surface Vehicles	Li, Shaobao; Er, Meng Joo; Wang, Ning; Chien, Chiang-Ju; Yang, Zhenyu	2017 INTERNATIONAL CONFERENCE ON FUZZY THEORY AND ITS APPLICATIONS (IFUZZY)	2017
1	Design of Heading Control System for USV Based on Moos-IvP	Dong, Lingyan; Xu, Hongli	PROCEEDINGS OF 2017 IEEE 2ND INFORMATION TECHNOLOGY, NETWORKING, ELECTRONIC AND AUTOMATION CONTROL CONFERENCE (ITNEC)	2017
1	Trajectory Generation with Communication-Induced Constraints for Surface Vehicles	Hervagault, Yoann; Prodan, Ionela; Lefevre, Laurent	2017 21ST INTERNATIONAL CONFERENCE ON SYSTEM THEORY, CONTROL AND COMPUTING (ICSTCC)	2017
1	Path-Following Control for Unmanned Surface Vehicles	Li, Zhi; Bachmayer, Ralf; Vardy, Andrew	2017 IEEE/RSJ INTERNATIONAL CONFERENCE ON INTELLIGENT ROBOTS AND SYSTEMS (IROS)	2017
2	Enabling Technologies for Autonomous Offshore Inspections by Heterogeneous Unmanned Teams	Collins, Gaemus; Clausse, Aubrey; Twining, David	OCEANS 2017 - ABERDEEN	2017
4	Magnetometers independent heading estimation strategy for UUV based on position and speed observations	Costanzi, Riccardo; Fenucci, Davide; Caiti, Andrea; Fanelli, Francesco; Monni, Niccolo; Ridolfi, Alessandro; Allotta, Benedetto	OCEANS 2017 - ABERDEEN	2017
2	Marine surveillance capabilities of the AutoNaut wave-propelled unmanned surface vessel (USV)	Johnston, Phil; Poole, Mike	OCEANS 2017 - ABERDEEN	2017
2	Deployment of a Passive Acoustic Monitoring (PAM) array from the AutoNaut wave-propelled Unmanned Surface Vessel (USV)	Johnston, Phil; Pierpoint, Chris	OCEANS 2017 - ABERDEEN	2017
1	Network Enabled Cooperation of Autonomous Vehicles: A Communications Perspective	Pinto, Jose; Ribeiro, Manuel; Giodini, Stefania; L'Hoir, Patrick; Sartore, Alessandro; Giron-Sierra, J. M.; Braga, Jose; Sousa, Joao	OCEANS 2017 - ABERDEEN	2017
1	Coordinated Path-following of Underactuated Unmanned Surface Vehicles with Limited Torques Over a Closed Curve	Liu, Lu; Wang, Dan; Peng, Zhouhua; Gu, Nan; Zhang, Bin	2017 13TH IEEE INTERNATIONAL CONFERENCE ON CONTROL & AUTOMATION (ICCA)	2017
1	Design and simulate a Fuzzy autopilot for an Unmanned Surface Vessel	Nhat Minh Do; Phung Hung Nguyen; Duy Anh Nguyen	2017 INTERNATIONAL CONFERENCE ON SYSTEM SCIENCE AND ENGINEERING (ICSSE)	2017
1	Attitude Estimation of an Unmanned Surface Vehicle Using MEMS-AHRS and GNSS	Ko, Nak Yong; Lee, Seong Ju; Jeong, Seokki; Moon, Yong Seon	2017 17TH INTERNATIONAL CONFERENCE ON CONTROL, AUTOMATION AND SYSTEMS (ICCAS)	2017
2	The Anyar River Depth Mapping from Surveying Boat (SHUMOO) Using ArcGIS and Surfer	Suhari, K. T.; Gunawan, P. H.	2017 INTERNATIONAL CONFERENCE ON CONTROL, ELECTRONICS, RENEWABLE ENERGY AND COMMUNICATIONS (ICCREC)	2017
1	Optimization Analysis of USV Based on Genetic Algorithm	Wu Changnan; Liu Man; Yang Songlin; Gao Shasha	PROCEEDINGS OF THE 2017 5TH INTERNATIONAL CONFERENCE ON MECHATRONICS, MATERIALS, CHEMISTRY AND COMPUTER ENGINEERING (ICMMCCE 2017)	2017
4	Underwater Vehicle Near-Surface Dynamic Positioning: Compensating Sliding Mode Trajectory with Robust Optimal Controller	Wang, Xiaoyang; Ye, Xiufen; Li, Chuanlong; Liu, Wenzhi	2017 IEEE INTERNATIONAL CONFERENCE ON MECHATRONICS AND AUTOMATION (ICMA)	2017
1 and 2	Development Status of Small-Sized Ka-band Mobile Terminal for Maritime Broadband Communications	Katayama, Norihiko; Yoshimura, Naoko; Takamatsu, Hideo; Kitazume, Susumu; Takahara, Yosuke; Lewis, Marshall; Gilmore, Rowan	WIRELESS AND SATELLITE SYSTEMS (WISATS 2016)	2017
4	A TRACKED DOUBLE-BODIED VEHICLE FOR USE IN OUTDOOR ENVIRONMENTS	Benson, Michael; Clayton, Garrett M.	PROCEEDINGS OF THE ASME 10TH ANNUAL DYNAMIC SYSTEMS AND CONTROL CONFERENCE, 2017, VOL 1	2017
1	Coordinated maritime missions of unmanned vehicles - network architecture and performance analysis	Zolich, Artur; Saegrov, Atle; Vagsholm, Erlend; Hovstein, Vegard; Johansen, Tor Arne	2017 IEEE INTERNATIONAL CONFERENCE ON COMMUNICATIONS (ICC)	2017
4	Effect of Tip Clearance on Hydraulic Performance of Water-jet Pump	Yang, Duo; Huang, Zuodong; Guo, Ang; Xu, Jiawei; Jiao, Lei	INTERNATIONAL CONFERENCE ON FLUID MECHANICS AND INDUSTRIAL APPLICATIONS (FMIA 2017)	2017
1 and 2	ON-LINE TASK DECOMPOSITION FOR COLLABORATIVE SURVEILLANCE OF MARINE ENVIRONMENT BY A TEAM OF UNMANNED SURFACE VEHICLES	Shriyam, Shaurya; Shah, Brual C.; Gupta, Satyandra K.	PROCEEDINGS OF THE ASME INTERNATIONAL DESIGN ENGINEERING TECHNICAL CONFERENCES AND COMPUTERS AND INFORMATION IN ENGINEERING CONFERENCE, 2017, VOL 5B	2017
4	Evaluation of the Ice Thickness by Means of the Radio Interferential Method	Ostrovskij, Vasily; Lagunov, Alexey; Orlov, Alexey	IV INTERNATIONAL YOUNG RESEARCHERS' CONFERENCE: PHYSICS, TECHNOLOGIES AND INNOVATION (PTI-2017)	2017
4	Development of an advanced cybersecure radio for small unmanned ground vehicles	Nguyen, Hoa G.; Pezeshkian, Narek; Yen, John; Hart, Abraham	UNMANNED SYSTEMS TECHNOLOGY XIX	2017
1	An object detection and tracking system for unmanned surface vehicles	Yang, Jian; Xiao, Yang; Fang, Zhiwen; Zhang, Naiwen; Wang, Li; Li, Tao	TARGET AND BACKGROUND SIGNATURES III	2017
1	Design method of USV course-tracker based on simulation and real vessel experiment	Wang, Le; Wu, Qing; Liu, Chenguang; Xie, Shuo; Chu, Xiumin	2017 4TH INTERNATIONAL CONFERENCE ON TRANSPORTATION INFORMATION AND SAFETY (ICTIS)	2017
1	System Design of an Unmanned Surface Vehicle for Autonomous Navigation	Kim, Taejin; Choi, Jinwoo; Lee, Yeongjun; Jung, Jongdae; Choi, Hyun-Taek	AETA 2016: RECENT ADVANCES IN ELECTRICAL ENGINEERING AND RELATED SCIENCES: THEORY AND APPLICATION	2017
4	Detecting Rooftops in 3D Point Clouds For Solar Mapping	Yalcin, Hulya; Celik, M. Furkan; Erten, Esra	2017 25TH SIGNAL PROCESSING AND COMMUNICATIONS APPLICATIONS CONFERENCE (SIU)	2017
1	Estimation of Fluctuation Characterizations by USV-Operation Simulations in Sea State 3	Park, Jae-Han; Bae, Ji-Hun; Baeg, Moon-Hong	MODELLING AND SIMULATION IN ENGINEERING	2017
4	Parameter Estimation and Verification of Unmanned Air Cushion Vehicle (UACV) System	Ab Rashid, Mohd Zamzuri; Shah, Hairol Nizam Mohd; Othman, Md Nazri; Alandoli, Esmail Ali Ali; Aras, Mohd Shahrieel Mohd; Sulaiman, Marizan; Latif, Mohd Faruq Abdul	ENGINEERING TECHNOLOGY INTERNATIONAL CONFERENCE 2016 (ETIC 2016)	2017
1	Operational Testing Of Highly Autonomous Unmanned Surface Vessel	Drubin, Cliff	MICROWAVE JOURNAL	2017
2	Design of a Marine Debris Removal System	Chrissley, Thomas; Yang, Morgan; Maloy, Connor; Mason, Anthony	2017 SYSTEMS AND INFORMATION ENGINEERING DESIGN SYMPOSIUM (SIEDS)	2017
1 and 2	A Study on the Effectiveness of MOOS-IvP for Unmanned Surface Vehicle	Kim, Taejin; Lee, Yeongjun; Park, Jeonghong; Choi, Hyun-Taek	2017 IEEE UNDERWATER TECHNOLOGY (UT)	2017
4	An Unmanned Tracked Vehicle for Snow Research Applications	Das, R. K.; Upadhyay, A.; Garg, R. K.	DEFENCE SCIENCE JOURNAL	2017
4	Underwater Pose Estimation Relative to Planar Hull Surface Using Stereo Vision	Chung, Dongha; Hong, Seonghun; Kim, Jinwhan	2017 IEEE UNDERWATER TECHNOLOGY (UT)	2017
1 and 2	Design and Implementation of an USV for Large Bodies of Fresh Waters at the Highlands of Peru	Balbuena, Jose; Quiroz, Diego; Song, Rui; Bucknall, Richard; Cuellar, Francisco	OCEANS 2017 - ANCHORAGE	2017
2	Evaluation of Ocean Plume Characteristics using Unmanned Surface Vessels	Fahad, Muhammad; Guo, Yi; Bingham, Brian; Krasnosky, Kristopher; Fitzpatrick, Laura; Sanabria, Fernando A.	OCEANS 2017 - ANCHORAGE	2017
4	A Novel Terrain Information Measure for Terrain-Referenced Underwater Navigation	Kim, Taeyun; Kim, Jinwhan	OCEANS 2017 - ANCHORAGE	2017
1	Study on the Dynamic Behaviors of an USV with a ROV	Mai The Vu; Choi, Hyeung-Sik; Thieu Quang Minh Nhat; Ji, Dae-Hyeong; Son, Hyun-Joong	OCEANS 2017 - ANCHORAGE	2017
1 and 2	Ten Years of Wave Glider Operations: A Persistent Effort	Manley, Justin E.; Carlon, Ryan; Hine, Graham	OCEANS 2017 - ANCHORAGE	2017
1	USV Geometric Collision Avoidance Algorithm for Multiple Marine Vehicles	Niu, Hanlin; Savvaris, Al; Tsourdos, Antonios	OCEANS 2017 - ANCHORAGE	2017
2	A Formation of Unmanned Vehicles for Tracking of an Acoustic Fish-Tag	Zolich, Artur; Johansen, Tor Arne; Alfredsen, Jo Arve; Kuttenkeuler, Jakob; Erstorp, Elias	OCEANS 2017 - ANCHORAGE	2017
4	Optimal design of hydraulic support landing platform for a four-rotor dish-shaped UUV using particle swarm optimization	Zhang, Bao-Shou; Song, Bao-Wei; Jiang, Jun; Mao, Zhao-Yong	INTERNATIONAL JOURNAL OF NAVAL ARCHITECTURE AND OCEAN ENGINEERING	2016
1	Study on the Remote Controllability of Vision Based Unmanned Vehicle Using Virtual Unmanned Vehicle Driving Simulator	Kim, Sunwoo; Han, Jong-Boo; Kim, Sung-Soo	TRANSACTIONS OF THE KOREAN SOCIETY OF MECHANICAL ENGINEERS A	2016
1	Finite-Time Trajectory Tracking Control of Unmanned Surface Vehicle with Input Saturation	Gao, Ying; Wang, Ning; Lv, Shuailin; Er, Meng Joo	2016 IEEE 6TH INTERNATIONAL CONFERENCE ON UNDERWATER SYSTEM TECHNOLOGY: THEORY AND APPLICATIONS	2016
1	Mapping GPS-denied aquatic environments	Codd-Downey, Robert; Jenkin, Michael	2016 IEEE INTERNATIONAL CONFERENCE ON INFORMATION AND AUTOMATION (ICIA)	2016
1	Fusion of Multiple Sensor Measurements for Navigation of an Unmanned Marine Surface Vehicle	Ko, Nak Yong; Jeong, Seokki; Choi, Hyun Taek; Lee, Chong-Moo; Moon, Yong Seon	2016 16TH INTERNATIONAL CONFERENCE ON CONTROL, AUTOMATION AND SYSTEMS (ICCAS)	2016
1	Visual Tracking of Objects for Unmanned Surface Vehicle Navigation	Chae, Kyung Hwa; Moon, Yong Seon; Ko, Nak Yong	2016 16TH INTERNATIONAL CONFERENCE ON CONTROL, AUTOMATION AND SYSTEMS (ICCAS)	2016
1	A nonlinear H-infinity control approach for autonomous navigation of underactuated vessels	Rigatos, Gerasimos; Siano, Pierluigi; Zervos, Nikolaos	2016 16TH INTERNATIONAL CONFERENCE ON CONTROL, AUTOMATION AND SYSTEMS (ICCAS)	2016
4	The future of Italian ground and naval Active Electronically Scanned Arrays (AESA) Radars	Caronti, A.; Celentano, S.; Immediata, S.; Mosca, S.; Petrucci, R.; Pierno, L.; Timmoneri, L.; Vigilante, D.	2016 IEEE INTERNATIONAL SYMPOSIUM ON PHASED ARRAY SYSTEMS AND TECHNOLOGY (PAST)	2016
4	Design Considerations of Submersible Unmanned Flying Vehicle for Communications and Underwater Sampling	Bershadsky, Dmitry; Haviland, Steve; Valdez, Pierre E.; Johnson, Eric	OCEANS 2016 MTS/IEEE MONTEREY	2016
4	A New Approach to Wide Area Survey Multiple AUV Application	Christ, Bob; Klara, Jake	OCEANS 2016 MTS/IEEE MONTEREY	2016
1	Navigation of Unmanned Surface Vehicle and Detection of GPS Abnormality by Fusing Multiple Sensor Measurements	Ko, Nak Yong; Choi, Hyun Taek; Lee, Chong-Moo; Moon, Yong Seon	OCEANS 2016 MTS/IEEE MONTEREY	2016
2	Sensor-Based Motion Planning for Autonomous Vehicle Teams	Kragelund, Sean; Walton, Claire; Kaminer, Isaac	OCEANS 2016 MTS/IEEE MONTEREY	2016
4	Utilization and Risk of Undersea Communications	Luqi	OCEANS 2016 MTS/IEEE MONTEREY	2016
3	Unmanned Maritime Vehicles, 20 Years Of Commercial and Technical Evolution	Manley, Justin E.	OCEANS 2016 MTS/IEEE MONTEREY	2016
2	Unmanned Surface Vessels (USVs) as Tow Platforms: Wave Glider Experience and Results	Manley, Justin E.; Hine, Graham	OCEANS 2016 MTS/IEEE MONTEREY	2016
3	Research to Operations: Evaluating Unmanned Surface Vehicles	Manley, Justin E.; Leonardi, Alan; Beaverson, Chris	OCEANS 2016 MTS/IEEE MONTEREY	2016
4	Reconfigurable Distributed Software Platform for a Group of UUVs (Yet Another Robot Platform)	Pavin, Alexander; Inzartsev, Alexander; Eliseenko, Grigory	OCEANS 2016 MTS/IEEE MONTEREY	2016
4	Development of Underwater Inspection System for Dam Inspection: Results of Field Tests	Shimono, Soji; Toyama, Shigeki; Nishizawa, Uichi	OCEANS 2016 MTS/IEEE MONTEREY	2016
4	Communications-Optimized Task Planning for Maritime Search and Survey	Valdez, Pierre E.; Griendling, Kelly; Mavris, Dimitri; Coker, Ayodeji; Bays, Matthew J.	OCEANS 2016 MTS/IEEE MONTEREY	2016
1 and 2	Hell Bay Trials: A Multinational Collaborative Marine Autonomy Field Experimentation Program	Weaver, Joshua; Dunlap, Damion	OCEANS 2016 MTS/IEEE MONTEREY	2016
2	A Novel Method of Obtaining Near Real-Time Observations of Phytoplankton from a Mobile Autonomous Platform	Ziccarelli, Lisa; Dellor, Roger; Johnson, Richard; Schmitz, Heike; O'Reilly, Tom; Chavez, Francisco	OCEANS 2016 MTS/IEEE MONTEREY	2016
2	Using Autonomous Surface Vehicles for Passive Acoustic Monitoring (PAM)	Ziegwied, Andrew T.; Dobbin, Vince; Dyer, Sarah; Pierpoint, Chris; Sidorovskaia, Natalia	OCEANS 2016 MTS/IEEE MONTEREY	2016
1	A Method to Evaluate Autonomous Performance for Unmanned Surface Vehicle	Zhang Ru-bo; Duan Li-qun; Shi Chang-ting	PROCEEDINGS OF THE 35TH CHINESE CONTROL CONFERENCE 2016	2016
1	Dynamic Replanning Algorithm of local trajectory for Unmanned Surface Vehicle	Liu Deli; Xu Dong; Wang Nan; Zhang Ziying; Tang Pingpeng	PROCEEDINGS OF THE 35TH CHINESE CONTROL CONFERENCE 2016	2016
4	Some remarks on potential field constructions in a multi-obstacle environment	Prodan, Ionela; Stoican, Florin; Grotli, Esten Ingar	IFAC PAPERSONLINE	2016
1	Optimal Path Planning of a Mini USV using Sharp Cornering Algorithm	Asrofi, Muhammad; Cahyadi, Adha Imam; Wahyunggoro, Oyas	PROCEEDINGS OF 2016 INTERNATIONAL CONFERENCE ON INFORMATION TECHNOLOGY SYSTEMS AND INNOVATION (ICITSI)	2016
1	Finite-Time Disturbance Observer Based Non-Singular Integral Terminal Sliding Mode Trajectory Tracking Control of Unmanned Surface Vehicles	Lv, Shuailin; Wang, Ning; Liang, Xiaoling; Er, Meng Joo	2016 IEEE CHINESE GUIDANCE, NAVIGATION AND CONTROL CONFERENCE (CGNCC)	2016
1	An Improved Unscented Kalman Filter and the Application to Heading Control of Micro Unmanned Surface Vehicles	Fu, Yue-wen; Liao, Yu-lei; Wang, Bo; Li, Ye; Shen, Rai-long; Liang, Xiao	2016 IEEE CHINESE GUIDANCE, NAVIGATION AND CONTROL CONFERENCE (CGNCC)	2016
4	Flight Testing of Control Allocation for Elevator Actuator Fault in Small UAV	Sahwee, Zulhilmy; Mahmood, Aina Suriani; Rahman, Nazaruddin Abd; Sahari, Khairul Salleh Mohamed	2016 INTERNATIONAL CONFERENCE ON CONTROL, AUTOMATION AND INFORMATION SCIENCES (ICCAIS)	2016
4	A NEW FLAPPING-HYDROFOIL WAVE POWER GENERATING UNMANNED OCEAN VEHICLE	Sun, Tao; Zhao, Jiangbin; Yan, Xinping; Xu, Pengpeng	PROCEEDINGS OF THE ASME 35TH INTERNATIONAL CONFERENCE ON OCEAN, OFFSHORE AND ARCTIC ENGINEERING , 2016, VOL 6	2016
4	AUTOMATED LANDING AND MOORING IN DEEP-SEA ENVIRONMENT USING SUCTION BUCKETS FOR UNMANNED VEHICLES	Boeck, Florin; Golz, Matthias; Ritz, Sebastian; Holbach, Gerd	PROCEEDINGS OF THE ASME 35TH INTERNATIONAL CONFERENCE ON OCEAN, OFFSHORE AND ARCTIC ENGINEERING , 2016, VOL 7	2016
4	A BALLAST SYSTEM FOR AUTOMATED DEEP-SEA ASCENTS	Golz, Matthias; Boeck, Florin; Ritz, Sebastian; Holbach, Gerd	PROCEEDINGS OF THE ASME 35TH INTERNATIONAL CONFERENCE ON OCEAN, OFFSHORE AND ARCTIC ENGINEERING , 2016, VOL 7	2016
1	Adaptive Course Control System of an Unmanned Surface Vehicle (USV) Based on Back-propagation Neural Network (BPNN)	Fang, Yang; Zhang, Huajun; Wang, Biao; Jiang, Chaochao	Proceedings of the 2016 4th International Conference on Mechanical Materials and Manufacturing Engineering (MMME 2016)	2016
2	An USV-based Laser Fluorosensor for Oil Spill Detection	Liu, Deqing; Luan, Xiaoning; Zhang, Feng; Jin, Jiucai; Guo, Jinjia; Zheng, Ronger	2016 10TH INTERNATIONAL CONFERENCE ON SENSING TECHNOLOGY (ICST)	2016
2	TOWARDS DEEP-SEA MONITORING WITH SMIS - EXPERIMENTAL TRIALS OF DEEP-SEA ACOUSTIC LOCALIZATION	Neumann, Sergej; Oertel, David; Woern, Heinz; Kurowski, Martin; Dewitz, Detlef; Waniek, Joanna J.; Kaiser, David; Mars, Robert	ASSISTIVE ROBOTICS	2016
4	A Novel GNSS Integrity Augmentation System for Autonomous Airport Ground Operations	Bijjahalli, Suraj; Ramasamy, Subramanian; Sabatini, Roberto	PROCEEDINGS OF THE 29TH INTERNATIONAL TECHNICAL MEETING OF THE SATELLITE DIVISION OF THE INSTITUTE OF NAVIGATION (ION GNSS+ 2016)	2016
4	DEVELOPMENT OF METHODS AND TECHNOLOGIES FOR INTEGRATED GROUND-SPACE MONITORING IN THE OFFSHORE AREAS OF THE WESTERN ARCTIC AND SOUTHERN RUSSIA SEAS	Matishov, Academician G. G.; Berdnikov, S. V.; Likhtanskaya, N. V.; Yaitskaya, N. A.; Mesropyan, K. E.	WATER RESOURCES, FOREST, MARINE AND OCEAN ECOSYSTEMS CONFERENCE PROCEEDINGS, SGEM 2016, VOL II	2016
1	A concept design of three rudders-shaped like body in columns for low-drag USV	Azzeri, M. N.; Adnan, F. A.; Adi, M.; Zain, M. Z. Md	INTERNATIONAL CONFERENCE ON INNOVATIVE RESEARCH - ICIR EUROINVENT 2016	2016
1	ERON: A PID Controlled Autonomous Surface Vessel	Demetriou, Giorgos A.; Hadjipieri, Andreas; Panayidou, Irene Erica; Papasavva, Antonis; Ioannou, Stclios	PROCEEDINGS OF THE 18TH MEDITERRANEAN ELECTROTECHNICAL CONFERENCE MELECON 2016	2016
1 and 2	Link Strength for Unmanned Surface Vehicle's Underwater Acoustic Communication	Lv Zhichao; Zhang Jie; Jin Jiucai; Liu Lanjun	2016 IEEE/OES CHINA OCEAN ACOUSTICS SYMPOSIUM (COA)	2016
4	A Multi-view Sonar Image Fusion Method Based on the Morphological Wavelet and Directional Filters	Zhang Zhigang; Bian Hongyu; Song Ziqi	2016 IEEE/OES CHINA OCEAN ACOUSTICS SYMPOSIUM (COA)	2016
4	Testing of planetary rover wheels	Genta, Giancarlo; Pizzamiglio, Cristiano	2016 IEEE METROLOGY FOR AEROSPACE (METROAEROSPACE)	2016
4	Design of an Autonomous Antarctic Exploration Platforms through Manipulations of All-Terrain Vehicles	Lee, Taekgyu; Cho, Seunghyun; Roh, Chiwon; Lee, Soojun; Kang, Yeonsik	2016 IEEE TRANSPORTATION ELECTRIFICATION CONFERENCE AND EXPO, ASIA-PACIFIC (ITEC ASIA-PACIFIC)	2016
1	Design of Unmanned Surface Vessels Experiment Platform	Wang, Changshun	PROCEEDINGS OF THE 2ND INTERNATIONAL CONFERENCE ON ADVANCES IN MECHANICAL ENGINEERING AND INDUSTRIAL INFORMATICS (AMEII 2016)	2016
4	Benchmarking Assessment for Technology Readiness in SpaceBot	Insaurralde, Carlos C.; Kaupisch, Thilo	2016 IEEE AEROSPACE CONFERENCE	2016
1	Sea-Surface Reconstruction for Surface Marine Vehicles: A Matrix Completion Approach	Jones, Bryn Ll.; Heins, Peter H.; Esnaola, Inaki	2016 UKACC 11TH INTERNATIONAL CONFERENCE ON CONTROL (CONTROL)	2016
1	An USV Controlling Autonomy Level Algorithm Based on PROMMETHEE	Dong, Yingru; Zou, Qijie; Zhang, Rubo; Kang, Ling; Ren, Changning	PROCEEDINGS OF THE 2016 12TH WORLD CONGRESS ON INTELLIGENT CONTROL AND AUTOMATION (WCICA)	2016
1	Trajectory Tracking Control of Underactuated USV with Model Perturbation and External Interference	Liu, Jinbiao; Luo, Jun; Cui, Jianxiang; Peng, Yan	2016 3RD INTERNATIONAL CONFERENCE ON MECHANICS AND MECHATRONICS RESEARCH (ICMMR 2016)	2016
1	Optimal Configuration of USVs for Moving Long Baseline Positioning system	Chen, Wei; Yan, Weisheng; Cui, Rongxin; Cui, Haiying	IEEE ICARM 2016 - 2016 INTERNATIONAL CONFERENCE ON ADVANCED ROBOTICS AND MECHATRONICS (ICARM)	2016
4	The Structure Optimization of Unmanned Underwater Vehicle's Wedge-ring Joint Based On the Response Surface Method	Gu, Haitao; Meng, Lingshuai; Lin, Yang; Yi, Ruiwen; Yang, Yi	OCEANS 2016 - SHANGHAI	2016
1	Efficient Path Following Algorithm for Unmanned Surface Vehicle	Niu, Hanlin; Lu, Yu; Savvaris, Al; Tsourdos, Antonios	OCEANS 2016 - SHANGHAI	2016
1	Hydrodynamic Analysis of a SWATH Planing USV Based on CFD	Wang, Chao; Lin, Yang; Hu, Zhiqiang; Geng, Lingbo; Li, Dongdong	OCEANS 2016 - SHANGHAI	2016
2	Unmanned Surface Vessel for Monitoring and Recovering of Spilled Oil on Water	Wang, Jianhua; Ren, Fuxin; Li, Zhenyi; Liu, Zhao; Zheng, Xiang; Yang, Yongsheng	OCEANS 2016 - SHANGHAI	2016
1	Calibration of Vision System Used on Unmanned Surface Vehicle	Wang, Jianhua; Li, Zhenyi; Ren, Fuxin; Liu, Zhao; Shen, Aidi	OCEANS 2016 - SHANGHAI	2016
1	Low-cost MEMS-INS/GNSS Integration Using Quaternion-based Nonlinear Filtering Methods for USV	Xia, Guoqing; Wang, Guoqing; Chen, Xinghua; Xue, Jingjing	OCEANS 2016 - SHANGHAI	2016
1	Experimental Analysis on High Performance Unmanned Surface Vehicle	Zhang Gongyu; Yang Songlin; Qi Minghao; Zhou Shenjie; Zhang Sheng	PROCEEDINGS OF THE 2015 INTERNATIONAL CONFERENCE ON APPLIED MECHANICS, MECHATRONICS AND INTELLIGENT SYSTEMS (AMMIS2015)	2016
1	Sensitivity Analysis of Design Variables to Optimize the Performance of the USV	Cao Xue; Wei Zifan; Yang Songlin; Wen Yiyan	PROCEEDINGS OF THE 2015 INTERNATIONAL CONFERENCE ON APPLIED MECHANICS, MECHATRONICS AND INTELLIGENT SYSTEMS (AMMIS2015)	2016
1	Moving Horizon Estimation for Moving Long Baseline based on Linear Positioning Model	Chen, Wei; Yan, Weisheng; Cui, Rongxin	IFAC PAPERSONLINE	2016
4	PERFORMANCE ANALYSIS OF BIOLOGICALLY INSPIRED HONEYCOMB STRUCTURED HEAT EXCHANGER	Rahman, Mosfequr; Iqbal, Sakib; Calamas, David	PROCEEDINGS OF THE ASME INTERNATIONAL MECHANICAL ENGINEERING CONGRESS AND EXPOSITION, 2015, VOL 8A	2016
1	Visual SLAM with Keyframe Selection for Underwater Structure Inspection using an Autonomous Underwater Vehicle	Hong, Seonghun; Kim, Jinwhan	2016 13TH INTERNATIONAL CONFERENCE ON UBIQUITOUS ROBOTS AND AMBIENT INTELLIGENCE (URAI)	2016
2	Vertical Thrusting Unmanned Surface Vehicle for Stable and Close Inspection of Bridge Structure	Kim, Kyukwang; Hyun, Jieum; Choi, Duckyu; Myung, Hyun	2016 16TH INTERNATIONAL CONFERENCE ON CONTROL, AUTOMATION AND SYSTEMS (ICCAS)	2016
1 and 2	Design and control of an Unmanned Surface Vehicle for Environmental Monitoring Applications	Villa, J. L.; Paez, J.; Quintero, C.; Yime, E.; Cabrera, J.	2016 IEEE COLOMBIAN CONFERENCE ON ROBOTICS AND AUTOMATION (CCRA)	2016
1 and 2	Path Planning for Multi-agent Jellyfish Removal Robot System JEROS and Experimental Tests	Kim, Donghoon; Kim, Hanguen; Kim, Hyungjin; Shin, Jae-Uk; Myung, Hyun; Kim, Young-Geun	DISTRIBUTED AUTONOMOUS ROBOTIC SYSTEMS	2016
4	Flow Control and High-Lift Performance for Flying-Wing Unmanned Combat Air Vehicle Configurations by inserting slots	Ali, U.; Chadwick, E.	INTERNATIONAL JOURNAL OF MULTIPHYSICS	2016
2	Three-Dimensional Reconstruction of a Semi-Submersible Offshore Platform with an Unmanned Surface Vehicle	Han, Jungwook; Kang, Minju; Wang, Jeonghyeon; Kim, Jinwhan	OCEANS 2016 - SHANGHAI	2016
1	Study on Comprehensive Optimization Method in the Performance of a New Type of High-speed USV and Its Analysis	Wei, Zifan; Yang, Songlin; Jing, Shengping; Liu, Man	PROCEEDINGS OF 2016 INTERNATIONAL CONFERENCE ON MODELING, SIMULATION AND OPTIMIZATION TECHNOLOGIES AND APPLICATIONS (MSOTA2016)	2016
1	The Control Compensation Design and Its Stability Proof	Bai Yiming; Zhao Yongsheng; Fan Yunsheng	PROCEEDINGS OF THE 28TH CHINESE CONTROL AND DECISION CONFERENCE (2016 CCDC)	2016
2	Passive target tracking of marine traffic ships using onboard monocular camera for unmanned surface vessel (vol 51, pg 987, 2015)	Park, Jeonghong; Kim, Jinwhan; Son, Nam-sun	ELECTRONICS LETTERS	2015
1	Modeling and Simulation of Unmanned Vehicle Sentry Missions to Assess Communications in a Maritime Environment	Bays, Matthew; Perkins, Jim; Coker, Ayodeji; Cruzen, Christian; Braden, Julianne; Fouts, Cody; Griendling, Kelly; Mavris, Dimitri	NAVAL ENGINEERS JOURNAL	2015
1	Design and Analysis of CentrUMS-ITB Unmanned Semi-Submersible Vehicle	Kartidjo, Muljowidodo; Nugroho, Sapto Adi; Wibowo, Widiyanto	2015 10TH ASIAN CONTROL CONFERENCE (ASCC)	2015
4	Localization of UGV Based on 2-Point Absolute Pose Algorithm	Choi, Sung-In; Rathnayaka, Pathum; Park, Soon-Yong	2015 15TH INTERNATIONAL CONFERENCE ON CONTROL, AUTOMATION AND SYSTEMS (ICCAS)	2015
1	A Classification Method of Fog Image for USV Visual System	Ma, Zhongli; Liu, Quanyong; Hao, Liangliang; Chen, Yuwei	2015 34TH CHINESE CONTROL CONFERENCE (CCC)	2015
1	Autopilot Design for a Robotic Unmanned Surface Vehicle	Peng, Zhouhua; Tian, Yong; Wang, Dan; Liu, Lu	2015 34TH CHINESE CONTROL CONFERENCE (CCC)	2015
4	A Comparative Study of PID and SMC Controller for Nonlinear Unmanned Ground All Terrain Vehicle	Dave, Piyush N.; Patil, J. B.	2015 INTERNATIONAL CONFERENCE ON TRENDS IN AUTOMATION, COMMUNICATIONS AND COMPUTING TECHNOLOGY (I-TACT-15)	2015
4	Sliding Mode Control of Nonlinear Unmanned Ground All Terrain Vehicle	Dave, Piyush N.; Sawant, Kaveri; Kawale, Seema	2015 INTERNATIONAL CONFERENCE ON TRENDS IN AUTOMATION, COMMUNICATIONS AND COMPUTING TECHNOLOGY (I-TACT-15)	2015
4	Modeling and Control of Nonlinear Unmanned Ground All Terrain Vehicle	Dave, Piyush N.; Patil, J. B.	2015 INTERNATIONAL CONFERENCE ON TRENDS IN AUTOMATION, COMMUNICATIONS AND COMPUTING TECHNOLOGY (I-TACT-15)	2015
4	MISSION ADAPTIVE UAS CAPABILITIES FOR EARTH SCIENCE AND RESOURCE ASSESSMENT	Dunagan, S.; Fladeland, M.; Ippolito, C.; Knudson, M.; Young, Z.	36TH INTERNATIONAL SYMPOSIUM ON REMOTE SENSING OF ENVIRONMENT	2015
1	The Design and Application of an Unmanned Surface Vehicle Powered by Solar and Wind Energy	Zhou, X. Q.; Ling, L. L.; Ma, J. M.; Tian, H. L.; Yan, Q. S.; Bai, G. F.; Liu, S. Y.; Dong, L.	2015 6TH INTERNATIONAL CONFERENCE ON POWER ELECTRONICS SYSTEMS AND APPLICATIONS (PESA)	2015
1	Output Feedback Adaptive Control for Autopilot Design of An Unmanned Surface Vehicle	Liu, Lu; Wang, Dan; Peng, Zhouhua	2015 5TH INTERNATIONAL CONFERENCE ON INFORMATION SCIENCE AND TECHNOLOGY (ICIST)	2015
2	Automated Scheduling and Mission Visualization for Mine Countermeasure Operations	Bays, Matthew J.; Tatum, Richard D.; Cofer, Lee; Perkins, James R.	OCEANS 2015 - MTS/IEEE WASHINGTON	2015
2	Fully Automatic Boom Towing by Unmanned Ships: Experimental Study	Giron-Sierra, Jose M.; Gheorghita, Alina T.; Jimenez, Juan F.	OCEANS 2015 - MTS/IEEE WASHINGTON	2015
2	The Use of Saildrones to Examine Spring Conditions in the Bering Sea: Vehicle Specification and Mission Performance	Meinig, Christian; Lawrence-Slavas, Noah; Jenkins, Richard; Tabisola, Heather M.	OCEANS 2015 - MTS/IEEE WASHINGTON	2015
2	Autonomous Shallow Water Bathymetric Measurements for Environmental Assessment and Safe Navigation using USVs	Seto, M. L.; Crawford, A.	OCEANS 2015 - MTS/IEEE WASHINGTON	2015
2	Development of a USV-Based Bridge Inspection System	von Ellenrieder, Karl D.	OCEANS 2015 - MTS/IEEE WASHINGTON	2015
1	Formation Control of Unmanned Surface Vehicles with Vision Sensor Constraints	Wang, Jian; Liu, Jing-yang; Yi, Hong	OCEANS 2015 - MTS/IEEE WASHINGTON	2015
1	Evaluation of USV System Autonomy Based on Group Decision Making	Zou, Qijie; Zhang, Rubo	2015 CHINESE AUTOMATION CONGRESS (CAC)	2015
1	Mission Integrated Collision Avoidance for USVs using Laser Range Finder	Blaich, Michael; Koehler, Steffen; Schuster, Michael; Schuchhardt, Thomas; Reuter, Johannes; Tietz, Thomas	OCEANS 2015 - GENOVA	2015
1	Neural Dynamics and Sliding Mode Integration for the Guidance of Unmanned Surface Vehicles	Di Lecce, N.; Laschi, C.; Bibuli, M.; Bruzzone, G.; Zereik, E.	OCEANS 2015 - GENOVA	2015
1	A practical path planning and navigation algorithm for an unmanned surface vehicle using the fast marching algorithm	Liu, Yuanchang; Song, Rui; Bucknall, Richard	OCEANS 2015 - GENOVA	2015
2	Ocean Surface Vehicles for Maritime Security Applications (The PERSEUS project)	Real-Arce, Daniel A.; Barrera, Carlos; Hernandez, J.; Llinas, O.	OCEANS 2015 - GENOVA	2015
1	Development of a USV Station-Keeping Controller	Sarda, Edoardo I.; Bertaska, Ivan R.; Qu, Ariel; von Ellenrieder, Karl D.	OCEANS 2015 - GENOVA	2015
1	A Two-layered Fast Marching Path Planning Algorithm for an Unmanned Surface Vehicle Operating in a Dynamic Environment	Song, Rui; Liu, Yuanchang; Liu, Wenwen; Bucknall, Richard	OCEANS 2015 - GENOVA	2015
1	Design of an Obstacle Detection System for Marine Autonomous Vehicles	Sorbara, Andrea; Odetti, Angelo; Bibuli, Marco; Zereik, Enrica; Bruzzone, Gabriele	OCEANS 2015 - GENOVA	2015
1	The Collaborative Autonomy and Control Framework for Unmanned Surface Vehicle	Cui, Kuntao; Yang, Zuochang; Sun, Wenli	2015 NINTH INTERNATIONAL CONFERENCE ON FRONTIER OF COMPUTER SCIENCE AND TECHNOLOGY FCST 2015	2015
3	UNMANNED SURFACE AND UNDERSEA VEHICLES: CAPABILITIES AND POTENTIAL	Dobref, Vasile; Tarabuta, Octavian; Clinci, Catalin-Paul	21ST INTERNATIONAL CONFERENCE THE KNOWLEDGE-BASED ORGANIZATION	2015
1	Modelling, Manoeuvring Analysis and Course Following For Two Unmanned Surface Vehicles Driven By A Single Propeller And Double Propellers	Jin Jiu-cai; Zhang Jie; Shao Feng	2015 27TH CHINESE CONTROL AND DECISION CONFERENCE (CCDC)	2015
1	Design of the Parameter-adjusting Human Simulated Intelligent Controller for Water-jet-propelled Unmanned Surface Vehicle	Wu, Gong-xing; Shi, Dan-da; Liao, Yu-lei	2015 27TH CHINESE CONTROL AND DECISION CONFERENCE (CCDC)	2015
1	Low-Cost Plug-and-Play Optical Sensing Technology for USVs' Collision Avoidance	Sorbara, Andrea; Bibuli, Marco; Zereik, Enrica; Bruzzone, Gabriele; Caccia, Massimo	COMPUTER AIDED SYSTEMS THEORY - EUROCAST 2015	2015
1 and 2	Target Tracking by Distributed Autonomous Vessels using the Derivative-free Nonlinear Kalman Filter	Rigatos, Gerasimos; Siano, Pierluigi; Raffo, Guilerme	INTERNATIONAL CONFERENCE OF COMPUTATIONAL METHODS IN SCIENCES AND ENGINEERING 2015 (ICCMSE 2015)	2015
4	MONITORING OF TECHNOGENIC ARRAYS AND EFFECTIVE DUST SUPPRESSION METHODS APPLIED IN MINING OPERATIONS	Danilov, Aleksandr; Smirnov, Yuri; Pashkevich, Maria	SCIENCE AND TECHNOLOGIES IN GEOLOGY, EXPLORATION AND MINING, SGEM 2015, VOL III	2015
1	Study on the Course and Speed Cooperative Control Method for Unmanned Surface Vehicle	Cao, S. J.; Chen, Y. T.; Zeng, F. M.	PROCEEDINGS OF THE 5TH INTERNATIONAL CONFERENCE ON ADVANCED DESIGN AND MANUFACTURING ENGINEERING	2015
2	Monitoring the dispersion of an intentionally released tracer, SF5CF3 with an instrumented, unmanned surface vehicle.	L'Esperance, Chris; Wallace, Douglas	2015 IEEE 28TH CANADIAN CONFERENCE ON ELECTRICAL AND COMPUTER ENGINEERING (CCECE)	2015
1	Preliminary Study on Navigation Performance Optimization Analysis of A New Type USV and Its Methods	Jing Sheng-ping; Ma Tian-yu; Yang Song-lin	2015 IEEE 28TH CANADIAN CONFERENCE ON ELECTRICAL AND COMPUTER ENGINEERING (CCECE)	2015
1	Optimization of Parameters for an USV Autopilot	Annamalai, Andy S. K.; Yang, Chenguang	INTELLIGENT ROBOTICS AND APPLICATIONS, ICIRA 2015, PT I	2015
1	Iterative Template Matching Strategy for Visual Target Detection by Unmanned Surface Vehicle	Xu, Jin; Xie, Ming	INTELLIGENT ROBOTICS AND APPLICATIONS (ICIRA 2015), PT III	2015
1	The Evaluation Method of Autonomous Performance for USV Based on Adjustable Autonomy	Zhang, R. B.; Duan, L. Q.	INTERNATIONAL CONFERENCE ON AUTOMATION, MECHANICAL AND ELECTRICAL ENGINEERING (AMEE 2015)	2015
1	System Identification Methodology Preliminary Research on Maneuvering Motion of a New Type Unmanned Surface Vehicle	Ma, Tianyu; Wang, Taotao; Li, Jun; Yang, Songlin	PROCEEDINGS OF THE 2015 INTERNATIONAL CONFERENCE ON INTELLIGENT SYSTEMS RESEARCH AND MECHATRONICS ENGINEERING	2015
4	Planar SLAM under a Semi-Submersible Offshore Platform with an Unmanned Surface Vehicle	Han, Jungwook; Kang, Minju; Cho, Yonghoon; Kim, Jinwhan	2015 12TH INTERNATIONAL CONFERENCE ON UBIQUITOUS ROBOTS AND AMBIENT INTELLIGENCE (URAI)	2015
4	A Vision-Based Detection Algorithm for Moving Jellyfish in Underwater Environment	Kim, Donghoon; Kim, Hangeun; Jung, Sungwook; Koo, Jungmo; Kim, Jongheon; Myung, Hyun	2015 12TH INTERNATIONAL CONFERENCE ON UBIQUITOUS ROBOTS AND AMBIENT INTELLIGENCE (URAI)	2015
1	Robust adaptive fault tolerant control for a steering subsystem of unmanned underwater vehicles	Hao, Li-Ying; Li, Hui; Guo, Xiang-Gui; Cao, Lijie; Wang, Qihua	2015 34TH CHINESE CONTROL CONFERENCE (CCC)	2015
1	Global Sparsity Potentials for Obstacle Detection from Unmanned Surface Vehicles	Mou, Xiaozheng; Wang, Han	2015 INTERNATIONAL CONFERENCE ON IMAGE AND VISION COMPUTING NEW ZEALAND (IVCNZ)	2015
4	A Decentralized Geometric Approach for the Formation Keeping in Unmanned Aircraft Navigation	Bereg, S.; Diaz-Banez, J. M.; Lopez, M. A.; Rozario, T.; Valavanis, K.	2015 INTERNATIONAL CONFERENCE ON UNMANNED AIRCRAFT SYSTEMS (ICUAS'15)	2015
1	Autonomous collision avoidance for unmanned surface ships using onboard monocular vision	Park, Jeonghong; Cho, Yonghoon; Yoo, Byunghyun; Kim, Jinwhan	OCEANS 2015 - MTS/IEEE WASHINGTON	2015
2	Heterogeneous Autonomous Mobile Maritime Expeditionary Robots: Maritime Information Dominance	Bogart, Frank; Prijic, Christopher; Gututala, Keanu; Dong, Wenjie; Djapic, Vladimir; Galdorisi, George; Roche, Julia; Swigert, Brittany	NAVAL ENGINEERS JOURNAL	2014
4	Modeling a Captive Unmanned Aerial System Teledetecting Oil Pollution on the Sea Surface	Muttin, Frederic	MARINE COASTAL AND WATER POLLUTIONS: OIL SPILL STUDIES	2014
1	A COMBINED SPEED AND FINITE-TIME YAW CONTROLLER FOR AN UNDERACTUATED UNMANNED SURFACE VESSEL USING WAY-POINT NAVIGATION	Baker, Brendan; Qian, Chunjiang; Nowak, Brent	PROCEEDINGS OF THE ASME INTERNATIONAL DESIGN ENGINEERING TECHNICAL CONFERENCES AND COMPUTERS AND INFORMATION IN ENGINEERING CONFERENCE, 2013, VOL 4	2014
1	INTEGRATED TRAJECTORY PLANNING AND TRACKING CONTROL OF UNDERACTUATED SURFACE VESSELS	Mahini, Farshad; Ashrafiuon, Hashem	7TH ANNUAL DYNAMIC SYSTEMS AND CONTROL CONFERENCE, 2014, VOL 1	2014
4	CONCEPT FOR A DEPLOYABLE WING	Lachenal, Xavier; Weaver, Paul M.; Pirrera, Alberto	PROCEEDINGS OF THE ASME CONFERENCE ON SMART MATERIALS ADAPTIVE STRUCTURES AND INTELLIGENT SYSTEMS, 2014, VOL 2	2014
1	Antenna Array system for RT-1944/U Radio Communication	Khallaayoun, Ahmed; Huang, Yikun; Weber, Raymond J.; Tidd, William	2014 IEEE AEROSPACE CONFERENCE	2014
1	ADAPTIVE AND ROBUST CONTROL OF AN UNMANNED SURFACE VESSEL	Lee, Dongbin	PROCEEDINGS OF THE ASME CONFERENCE ON SMART MATERIALS, ADAPTIVE STRUCTURES, AND INTELLIGENT SYSTEMS - 2013, VOL 1	2014
4	The Role of Operator Style on Mission Energy Requirements for Tele-Operated Unmanned Ground Vehicles	Sadrpour, Amir; Jin, Judy; Ulsoy, A. Galip	2014 AMERICAN CONTROL CONFERENCE (ACC)	2014
4	A Design of Resistance Optimization System for Unmanned Submersible Vehicle Based on Response Surface Method	Wei, Zi-Fan; Wang, Meng-Yun; Yu, Qiang; Yang, Song-Lin	PROCEEDINGS OF THE 2014 INTERNATIONAL CONFERENCE ON MECHANICS AND CIVIL ENGINEERING	2014
1	Nonlinear Guidance Law Design Of Unmanned Surface Vessels	Chen, Yung-Yue; Lin, Guan-Wun; Hu, Wei-Min	11TH IEEE INTERNATIONAL CONFERENCE ON CONTROL AND AUTOMATION (ICCA)	2014
4	Surveillance of Ground Vehicles for Airport Security	Blasch, Erik; Wang, Zhonghai; Shen, Dan; Ling, Haibin; Chen, Genshe	GEOSPATIAL INFOFUSION AND VIDEO ANALYTICS IV; AND MOTION IMAGERY FOR ISR AND SITUATIONAL AWARENESS II	2014
1	A Practical Approach to Considering Uncertainties in the Creation of Autonomous Behaviors in Unmanned Surface Vehicles	Bay, Zi Jing; Yew, Chor Wei; Yue, Andrew; Lee, Yip Fatt; New, Ai Peng; Gan, Hao Yi	UNMANNED SYSTEMS TECHNOLOGY XVI	2014
4	Development and evaluation of the Stingray, an amphibious maritime interdiction operations unmanned ground vehicle	Nguyen, Hoa G.; Castelli, Cino Robin	UNMANNED SYSTEMS TECHNOLOGY XVI	2014
1	Development of an Unmanned Maritime System Reference Architecture	Duarte, Christiane N.; Cramer, Megan A.; Stack, Jason R.	OPEN ARCHITECTURE/OPEN BUSINESS MODEL NET-CENTRIC SYSTEMS AND DEFENSE TRANSFORMATION 2014	2014
1	Online Collision Avoidance Based on Modified Velocity Obstacle Approach for Unmanned Surface Vehicles	Leng, Jing; Liu, Jian; Xu, Hongli	INTERNATIONAL CONFERENCE ON ELECTRICAL, CONTROL AND AUTOMATION (ICECA 2014)	2014
4	Dynamic Surface and Active Disturbance Rejection Control for Path Following of an Underactuated UUV	Li, Juan; Gao, Haitao; Zhou, Jiajia; Yan, Zheping	JOURNAL OF APPLIED MATHEMATICS	2014
4	Two-phase Thermal Regulation System of a Manned Spacecraft	Menshchikov, I; Smorodin, A.	13TH CRYOGENICS 2014 IIR INTERNATIONAL CONFERENCE	2014
1	A marine monitoring two-body unmanned surface vehicle motion modeling and validation studies	Guan Sheng; Wang Yan-feng; Jin Jiu-cai; Han Zhao-hui	2014 11TH WORLD CONGRESS ON INTELLIGENT CONTROL AND AUTOMATION (WCICA)	2014
1	Research on Adjustable Autonomy Architecture for Unmanned Surface Vehicle	Yang, Ge; Ma, Xinxing; Zhang, Rubo; Shi, Changting	2014 11TH WORLD CONGRESS ON INTELLIGENT CONTROL AND AUTOMATION (WCICA)	2014
1 and 2	An Unmanned Surface Vehicle Robot Model; for Autonomous Sonobuoy deployment, and UAV landing platform	Gruber, Jordan; Anvar, Amir	2014 13TH INTERNATIONAL CONFERENCE ON CONTROL AUTOMATION ROBOTICS & VISION (ICARCV)	2014
1	Development of Surface Vehicle with Single Motor by Gliding Locomotion	Fuwa, Yasuhiro; Takimoto, Takashi	2014 14TH INTERNATIONAL CONFERENCE ON CONTROL, AUTOMATION AND SYSTEMS (ICCAS 2014)	2014
1	Targets Image Segmentation Based on Adaptive Mean-Shift Algorithm for Surface Moving Platform	Ma Zhongli; Wen Jie; Hao Liangliang; Wang Xiang	2014 33RD CHINESE CONTROL CONFERENCE (CCC)	2014
1	A Laboratory Exercise - Unmanned Vehicle Control and Wireless Sensor Networks	McLauchlan, Lifford; Mehrubeoglu, Mehrube	2014 ASEE ANNUAL CONFERENCE	2014
1	Simulation and Control of an Unmanned Surface Vehicle	McLauchlan, Lifford	2014 ASEE ANNUAL CONFERENCE	2014
1	Cooperative Navigation and Localization for Unmanned Surface Vessel with Low-cost sensors	Xu, Bo; Bai, Jinlei; Wang, Guochen; Zhang, Zhuo; Huang, WeiQuan	2014 DGON INERTIAL SENSORS AND SYSTEMS SYMPOSIUM (ISS)	2014
4	ENHANCED AIR OPERATIONS FOR GROUND SITUATIONAL AWARENESS	Blasch, Erik; Wang, Zhonghai; Shen, Dan; Chen, Genshe; Ling, Haibin	2014 IEEE/AIAA 33RD DIGITAL AVIONICS SYSTEMS CONFERENCE (DASC)	2014
1	Quasi-LPV Modeling and Identification for a Water-Jet Propulsion USV: an Experimental Study	Xiong, Junfeng; He, Yuqing; Gu, Feng; Li, Decai; Han, Jianda	2014 IEEE INTERNATIONAL CONFERENCE ON ROBOTICS AND BIOMIMETICS IEEE-ROBIO 2014	2014
1	Adaptive Control of Unmanned Surface Vessels Matching an Optimized Reference Model	Yang, Chenguang; Cui, Rongxin; Li, Zhijun; Sharma, Sanjay; Zhao, Xingang	2014 IEEE INTERNATIONAL CONFERENCE ON ROBOTICS AND BIOMIMETICS IEEE-ROBIO 2014	2014
4	Operational Glider Monitoring, Piloting, and Communications	Mensi, Bryan; Rowe, Rosemary; Dees, Sean; Bryant, Danielle; Jones, David; Carr, Robert	2014 IEEE/OES AUTONOMOUS UNDERWATER VEHICLES (AUV)	2014
1	High-Level Fuzzy Logic Guidance System for an Unmanned Surface Vehicle (USV) tasked to perform Autonomous Launch and Recovery (ALR) of an Autonomous Underwater Vehicle (AUV)	Pearson, David; An, Edgar; Dhanak, Manhar; von Ellenrieder, Karl; Beaujean, Pierre	2014 IEEE/OES AUTONOMOUS UNDERWATER VEHICLES (AUV)	2014
1	Obstacle detection for Unmanned Surface Vehicle	Azzabi, Tarek; Amor, Samir Belhaj; Nejim, Samir	2014 INTERNATIONAL CONFERENCE ON ELECTRICAL SCIENCES AND TECHNOLOGIES IN MAGHREB (CISTEM)	2014
4	Communication Challenges for Dual Configuration of ASV and AUV in Twinned Coordinated Navigation	Busquets, Javier; Busquets, Jose V.; Perles, Angel; Mercado, Ricardo; Saez, Raul; Serrano, Juan J.; Albentosa, Fracisco; Gilabert, Javier	2014 OCEANS - ST. JOHN'S	2014
4	A New Technology For Broadband Passive Bearing Estimation	Green, Dale; McManus, Steven J.	2014 OCEANS - ST. JOHN'S	2014
4	Assessing the Viability of Ultrasonic Distance Sensors for a Wave Profiling System	Heys, William; Bachmayer, Ralf	2014 OCEANS - ST. JOHN'S	2014
4	Design and evaluation of a magnetically-geared underwater propulsion system for autonomous underwater and surface craft	MacNeil, Levi; Claus, Brian; Bachmayer, Ralf	2014 OCEANS - ST. JOHN'S	2014
1	Experimental Results on Obstacle Avoidance for High Speed Unmanned Surface Vehicles	Simetti, Enrico; Torelli, Sandro; Casalino, Giuseppe; Turetta, Alessio	2014 OCEANS - ST. JOHN'S	2014
1	Dynamics Analysis of Wave-driven Unmanned Surface Vehicle in Longitudinal Profile	Tian, Baoqiang; Yu, Jiancheng; Zhang, Aiqun; Zhang, Fumin; Chen, Zhier; Sun, Kai	OCEANS 2014 - TAIPEI	2014
1	PD Based DIDO control method for unmanned surface vehicle to follow linear path	Wang, Jianhua; Zhao, Mengkai; Pei, Xiaoyan; Chu, Jianxin	OCEANS 2014 - TAIPEI	2014
1 and 2	Analysis on Sway of Spilled Oil Recovery Apparatus Lifted up from Unmanned Surface Vehicle	Wang, Jianhua; Wu, Yuping; Yang, Yongsheng; Gu, Wei; Mo, Jianying	OCEANS 2014 - TAIPEI	2014
4	Parameter Identification Based Fault Tolerant Control Against Actuator Failures Applied to UUV Dynamics	Uney, Emre; Hajiyev, Chingiz	PROCEEDINGS OF THE 2014 6TH INTERNATIONAL CONFERENCE ON ELECTRONICS, COMPUTERS AND ARTIFICIAL INTELLIGENCE (ECAI)	2014
4	EXPERIMENTAL MODEL FOR TESTING THE HYDRODYNAMIC RESISTANCE OF AN ENVIRONMENTAL UNDERWATER VEHICLE	Obreja, Dan; Marcu, Oana; Jagite, George	ENVIRONMENTAL ENGINEERING AND MANAGEMENT JOURNAL	2013
4	EFFECT OF NUMBER OF WHEELS ON HIGH SPEED UGV TRAVERSABILITY: ONLINE TERRAIN ASSESSMENT APPROACH	El-Kabbany, A. S.; Ramirez-Serrano, A.	INTERNATIONAL JOURNAL OF AUTOMOTIVE TECHNOLOGY	2013
4	Highlights from latest sea-operations in the Macaronesian region with unmanned autonomous marine gliding vehicles	Barrera, Carlos; Morales, Tania; Viera, Josue; Lorenzo, Alvaro; Vega, Daura; Llinas, Octavio; Jose Rueda, Maria	2013 MTS/IEEE OCEANS - BERGEN	2013
1	Design of control system of USV based on double propellers	Zhu, Qiang	2013 IEEE INTERNATIONAL CONFERENCE OF IEEE REGION 10 (TENCON)	2013
1	Maritime Channel Modeling and Simulation for Efficient Wideband Communications between Autonomous Unmanned Surface Vehicles	Coker, Ayodeji; Straatemeier, Logan; Rogers, Ted; Valdez, Pierre; Cooksey, Daniel; Griendling, Kelly	2013 OCEANS - SAN DIEGO	2013
1	Deliberative Optimization of Reactive Agents for Navigation	Jones, Anthony D.	2013 OCEANS - SAN DIEGO	2013
1	Adaptive Speed Control for Autonomous Surface Vessels	Kragelund, Sean; Dobrokhodov, Vladimir; Monarrez, Aurelio; Hurban, Michael; Khol, Curtis	2013 OCEANS - SAN DIEGO	2013
2	Safety and Security Applications for Micro-Unmanned Surface Vessels	Patterson, Mark C. L.; Mulligan, Anthony; Boiteux, Fernando	2013 OCEANS - SAN DIEGO	2013
4	Velocity control of Unmanned Ground Vehicles by wheel slip	Koo, Bo Seung; Bae, Seung Ho; Kim, Jung Ha	2013 10TH INTERNATIONAL CONFERENCE ON UBIQUITOUS ROBOTS AND AMBIENT INTELLIGENCE (URAI)	2013
4	SLUGS UAV: A Flexible and Versatile Hardware/Software Platform for Guidance Navigation and Control Research	Lizarraga, Mariano; Elkaim, Gabriel Hugh; Curry, Renwick	2013 AMERICAN CONTROL CONFERENCE (ACC)	2013
1	On an Autonomous Navigation System for Collision Avoidance of Unmanned Surface Vehicle	Son, Nam-sun	PROCEEDINGS OF THE ION 2013 PACIFIC PNT MEETING	2013
4	An Architecture for Online Semantic Labeling on UGVs	Suppe, Arne; Navarro-Serment, Luis; Munoz, Daniel; Bagnell, Drew; Hebert, Martial	UNMANNED SYSTEMS TECHNOLOGY XV	2013
4	Bioinspired corrugated airfoils for micro air vehicles	Khurana, Manas; Chahl, Javaan	BIOINSPIRATION, BIOMIMETICS, AND BIOREPLICATION 2013	2013
4	Underwater Electromagnetics and Its Application to Unmanned Underwater Platforms	Yoshida, Hiroshi	2013 IEEE INTERNATIONAL UNDERWATER TECHNOLOGY SYMPOSIUM (UT)	2013
1	Optoelectronic Systems on Board of Unmanned Surface Vehicle Edredon	Kitowski, Zygmunt	ADVANCES IN MECHATRONIC SYSTEMS, MECHANICS AND MATERIALS	2013
1	Multiple Unmanned Vehicles Operations in Confined Areas	Qian, Zhang; Leng, Gerard; Govindaraju, Vengatesan	2013 FOURTH GLOBAL CONGRESS ON INTELLIGENT SYSTEMS (GCIS)	2013
2	Field experiments for marine casualty detection with autonomous surface vehicles	Martins, Alfredo; Dias, Andre; Almeida, Jose; Ferreira, Hugo; Almeida, Carlos; Amaral, Guilherme; Machado, Diogo; Sousa, Joao; Pereira, Pedro; Matos, Anibal; Lobo, Vitor; Silva, Eduardo	2013 OCEANS - SAN DIEGO	2013
1	Intelligent Condition Monitoring System (ICMS) for Unmanned Air Vehicle (UAV), Unmanned Surface Vehicle (USV) and Autonomous Underwater Vehicle (AUV), Robots: A Feasibility Study	Xu, Xiang; Anvar, Amir	20TH INTERNATIONAL CONGRESS ON MODELLING AND SIMULATION (MODSIM2013)	2013
4	Local Path Planning for an Unmanned Ground Vehicle Based on SVM Regular Paper	Chen Qingyang; Sun Zhenping; Liu Daxue; Fang Yuqiang; Li Xiaohui	INTERNATIONAL JOURNAL OF ADVANCED ROBOTIC SYSTEMS	2012
4	Reliability-Based Design for Hoop Connection of Unmanned Undersea Vehicle under Uncertainty	Yang, Shunqi; Zhou, Yutao; Lu, Guoliang	INFORMATION-AN INTERNATIONAL INTERDISCIPLINARY JOURNAL	2012
1	PHYSICAL AND THEORETICAL MODELING OF SURFACE-PIERCING HYDROFOILS FOR A HIGH-SPEED UNMANNED SURFACE VESSEL	Brizzolara, Stefano; Young, Yin Lu	PROCEEDINGS OF THE ASME 31ST INTERNATIONAL CONFERENCE ON OCEAN, OFFSHORE AND ARCTIC ENGINEERING, 2012, VOL 4	2012
4	DEPLOYMENT DYNAMICS OF A SMALL CARBON FIBER TAPE-SPRING UAV WING	Coffin, Peter; Marzocca, Pier; Jha, Ratan; Ahmadi, Goodarz	PROCEEDINGS OF THE ASME INTERNATIONAL MECHANICAL ENGINEERING CONGRESS AND EXPOSITION, 2011, VOL 1	2012
4	Latecoere Rockets: Malaface, a Cruise Missile Precursor	Robert, Jean; Serra, Jean-Jacques; Jung, Philippe	HISTORY OF ROCKETRY AND ASTRONAUTICS	2012
1	Second-Level Sliding Mode Tracking Control of Unmanned Surface Vessels with Parameter Uncertainties	Zhu Qidan; Jiang Zhengqiao; Liu Zhilin; Yu Ruiting	PROCEEDING OF THE IEEE INTERNATIONAL CONFERENCE ON INFORMATION AND AUTOMATION	2012
1	Situation Cognitive in Adjustable Autonomy System Theory and Application	Zhang, Rubo; Yin, Lili	ADVANCES IN SWARM INTELLIGENCE, ICSI 2012, PT II	2012
4	Mission based Optimum System Selector for Bio-inspired Unmanned Untethered Underwater Vehicles	Haroutunian, Maryam; Murphy, Alan J.	2012 IEEE/OES AUTONOMOUS UNDERWATER VEHICLES (AUV)	2012
4	The Legal Regime Governing AUV Operations How Far and How Wide	Rogers, Roland	2012 IEEE/OES AUTONOMOUS UNDERWATER VEHICLES (AUV)	2012
1	Guidance and Control of An Unmanned Surface Vehicle Exhibiting Sternward Motion	Gadre, Aditya S.; Sonnenburg, Christian; Du, Shu; Stilwell, Daniel J.; Woolsey, Craig	2012 OCEANS	2012
1 and 2	Control of Tactical-Scale, Micro-Unmanned Surface Vehicles (USVs) Ocean Observations Platforms Systems and Observations	Patterson, M.; Marston, R.; Christopher, S.; Jacobs, A.; McDonald, Alexander; Nicinska, Justyna; Chadwick, Russ	2012 OCEANS	2012
1	An Experimental Comparison of Two USV Trajectory Tracking Control Laws	Sonnenburg, Christian; Woolsey, Craig A.	2012 OCEANS	2012
4	Unmanned Vehicle Mission-Level Autonomy Applications to the Littoral Combat Ship	Kiick, David M.	JOHNS HOPKINS APL TECHNICAL DIGEST	2012
4	Evaluation of range parameters of the cameras for security system protecting the selected critical infrastructure of seaport	Kastek, Mariusz; Barela, Jaroslaw; Zyczkowski, Marek; Dulski, Rafal; Trzaskawka, Piotr; Firmanty, Krzysztof; Kucharz, Juliusz	UNMANNED/UNATTENDED SENSORS AND SENSOR NETWORKS IX	2012
4	Bio-inspired aquatic flight propulsion system for agile and manoeuverable underwater vehicles	Man, S. G. K.; Phillips, A. B.; Boyd, S. W.; Blake, J. I. R.; Griffiths, G.	OCEANS, 2012 - YEOSU	2012
1 and 2	Development of a low cost Unmanned Surface Vehicle for military applications	Cadena, A.	OCEAN SENSING AND MONITORING IV	2012
1	Multi-Vehicle Decentralized Fusion and Tracking	El-Fallah, A.; Zatezalo, A.; Mahler, R.; Mehra, R. K.	SIGNAL PROCESSING, SENSOR FUSION, AND TARGET RECOGNITION XXI	2012
1 and 2	OBSTACLE DETECTION USING INTEGRATION OF OMNI-DIRECTIONAL CAMERA AND INERTIAL SENSOR	Guo, Yan; Ieng, Sio-Hoi; Romero, Miguel; Benosman, Ryad; Gas, Bruno	FIELD ROBOTICS	2012
4	Remote Sensing of Arctic Ocean by Compact Raman LIDAR	Bunkin, A. F.; Klinkov, V. K.; Lednev, V. N.; Marchenko, A. V.; Pershin, S. M.; Yulmetov, R. N.	ICE RESEARCH FOR A SUSTAINABLE ENVIRONMENT, VOLS I & II	2012
4	Analysis of Buoyancy and Design Features of the Underwater Vehicle	Urbach, A.; Carjova, K.; Zavtkevics, V.; Vulans, P.; Ozols, I.	MECHANIKA 2012: PROCEEDINGS OF THE 17TH INTERNATIONAL CONFERENCE	2012
1	Design of a Teleoperated Aquatic Vehicle for the Gauging of Water Bodies	Diaz-Gutierrez, C. E.; Garduno-Gaffare, M. P.; Segovia-De los Rios, J. A.; Benitez-Read, J. S.	JOURNAL OF APPLIED RESEARCH AND TECHNOLOGY	2011
1	Optimization on Resistance Performance of high Speed Unmanned Surface Vehicle in Middle-Low Speed	Ma, Weijia; Sun, Huawei; Pang, Yongjie	ADVANCED MATERIALS AND PROCESSES, PTS 1-3	2011
4	Multi-feature Extraction for Drivable Road Region Detection with a Two-Dimensional Laser Range Finder	Hu, Yuwen; Li, Xin; Gong, Jianwei	MULTI-FUNCTIONAL MATERIALS AND STRUCTURES ENGINEERING, ICMMSE 2011	2011
4	Effect of Wave and Ocean Current to Motion of Low-velocity UUV	Du Xiao-xu; Song Bao-wei; Pan Guang	MATERIALS, MECHATRONICS AND AUTOMATION, PTS 1-3	2011
1	Design of Strait-line Tracking Controller of Under-actuated USV Based on Back-stepping Method and Feedback Compensation	Ma, Yulong; Han, Jianda; He, Yuqing	MEASURING TECHNOLOGY AND MECHATRONICS AUTOMATION, PTS 1 AND 2	2011
4	An Optimized UUV Communications Framework for Multi-Vehicle Arbitration	Bouchard, Andrew T.	2011 IEEE - OCEANS SPAIN	2011
2	Autonomous Mine Hunting Mission for the Charlie USV	Bruzzone, Gabriele; Bruzzone, Giorgio; Bibuli, Marco; Caccia, Massimo	2011 IEEE - OCEANS SPAIN	2011
2	An Autonomous Energy Harvesting Station-Keeping Vehicle for Persistent Ocean Surveillance	Frizzell-Makowski, L. J.; Shelsby, R. A.; Mann, J.; Scheidt, D.	OCEANS 2011	2011
1	Maneuvering Simulation for Water-jet Propulsion Unmanned Surface Vehicle	Huang, Shuling; Xu, Yuru; Pang, Yongjie; Zhang, Tiedong; Wu, Gongxing	2011 6TH IEEE CONFERENCE ON INDUSTRIAL ELECTRONICS AND APPLICATIONS (ICIEA)	2011
4	Low Noise Magnetic Sensing for Marine Munitions Characterization	Schultz, Gregory; Keranen, Joe; Billings, Stephen; Fonda, Raul; Foley, Jack; Bassani, Chet	DETECTION AND SENSING OF MINES, EXPLOSIVE OBJECTS, AND OBSCURED TARGETS XVI	2011
4	Optimization Design for Hoop Connection of Unmanned Undersea Vehicle under Uncertainty	Yang, Shunqi; Zhou, Yutao	2011 INTERNATIONAL CONFERENCE ON QUALITY, RELIABILITY, RISK, MAINTENANCE, AND SAFETY ENGINEERING (ICQR2MSE)	2011
4	3-D OBJECT RECOGNITION FROM POINT CLOUD DATA	Smith, W.; Walker, A. S.; Zhang, B.	ISPRS HANNOVER WORKSHOP 2011: HIGH-RESOLUTION EARTH IMAGING FOR GEOSPATIAL INFORMATION	2011
1 and 2	A LOW-COST, HIGH RATE MOTION SOFTWARE SENSOR SYSTEM BASED ON NOVEL DATA FUSION FOR UNMANNED SURFACE VEHICLE NAVIGATION AND OCEANOGRAPHIC INSTRUMENTATION MOTION CORRECTION	Gelin, Chrystel R.; Xiros, Nikolaos I.	OMAE2011: PROCEEDINGS OF THE ASME 30TH INTERNATIONAL CONFERENCE ON OCEAN, OFFSHORE AND ARCTIC ENGINEERING, VOL 6: OCEAN ENGINEERING	2011
4	Real-Time Micro-Explosive Damage Detection in an Unmanned Rotorcraft Vehicle Using Embedded Sensing	Edge, H.; Chung, H.; Coatney, M.; Mary, B.; Tibbits, P.; Murugan, M.; Ghoshal, A.; Le, D.; Pappakostas, M.	STRUCTURAL HEALTH MONITORING 2011: CONDITION-BASED MAINTENANCE AND INTELLIGENT STRUCTURES, VOL 1	2011
4	REAL-TIME LOCALIZATION OF AN UNMANNED GROUND VEHICLE USING A 360 DEGREE RANGE SENSOR	Park, Soon-Yong; Choi, Sung-In	VISAPP 2011: PROCEEDINGS OF THE INTERNATIONAL CONFERENCE ON COMPUTER VISION THEORY AND APPLICATIONS	2011
1	Preliminary Hybrid Power System Optimization for an Unmanned Surface Vehicle	Khare, Neeta; Singh, Pritpal	25TH WORLD BATTERY, HYBRID AND FUEL CELL ELECTRIC VEHICLE SYMPOSIUM AND EXHIBITION PROCEEDINGS, VOLS 1 & 2	2010
1	Wave Energy Generation for Unmanned Ocean Vehicle	Ramachandrudu, Tina Madhavi; Singh, Pritpal	25TH WORLD BATTERY, HYBRID AND FUEL CELL ELECTRIC VEHICLE SYMPOSIUM AND EXHIBITION PROCEEDINGS, VOLS 1 & 2	2010
4	Cooperative Positioning in Underwater Sensor Networks	Tan, Xing; Li, Jian	OCEANS 2010	2010
1	A SIMULATION BASED FRAMEWORK FOR DISCOVERING PLANNING LOGIC FOR AUTONOMOUS UNMANNED SURFACE VEHICLES	Svec, Petr; Schwartz, Max; Thakur, Atul; Anand, Davinder K.; Gupta, Satyandra K.	PROCEEDINGS OF THE ASME 10TH BIENNIAL CONFERENCE ON ENGINEERING SYSTEMS DESIGN AND ANALYSIS, 2010, VOL 3	2010
1	TRACKING CONTROL OF UNMANNED SURFACE VEHICLES WITH ABKOWITZ STEERING MODEL	Nataraj, C.; Thimmaraya, Ramesh	PROCEEDINGS OF THE ASME DYNAMIC SYSTEMS AND CONTROL CONFERENCE 2010, VOL 1	2010
1	A COMPUTATIONAL FRAMEWORK FOR REAL-TIME UNMANNED SEA SURFACE VEHICLE MOTION SIMULATION	Thakur, Atul; Gupta, Satyandra K.	PROCEEDINGS OF THE ASME INTERNATIONAL DESIGN ENGINEERING TECHNICAL CONFERENCES AND COMPUTERS AND INFORMATION IN ENGINEERING CONFERENCE, DETC 2010, VOL 3, A AND B	2010
4	Online Visualization of Adaptive Distributed Sensor Webs	Talukder, Ashit; Panangadan, Anand	2009 IEEE AEROSPACE CONFERENCE, VOLS 1-7	2009
4	COMBINED METAL DETECTOR AND GROUND-PENETRATING RADAR SENSOR EXPERIMENTS IN A VARIETY OF SOIL CONDITIONS	Kim, Dae Man; Kim, Seok Hwan; Lee, Seokjae; Kim, Kangwook	2009 IEEE INTERNATIONAL GEOSCIENCE AND REMOTE SENSING SYMPOSIUM, VOLS 1-5	2009
4	Bistatic SAR Using Illumination From A Tethered Ground Moving Target Indication Radar	Davis, Mark E.; Kapfer, Robert	2009 IEEE RADAR CONFERENCE, VOLS 1 AND 2	2009
1	Design and Modeling of Unmanned Trimaran Surface Vehicles	Peng, Yan; Han, Jianda	ICIA: 2009 INTERNATIONAL CONFERENCE ON INFORMATION AND AUTOMATION, VOLS 1-3	2009
4	DESIGN AND FABRICATION OF MULTIFUNCTIONAL STRUCTURE-POWER COMPOSITES FOR MARINE APPLICATIONS	Qidwai, M. A. Siddiq; Thomas, James P.; Pogue, William R., III; Rohatgi, Aashish	IMECE 2008: MECHANICS OF SOLIDS, STRUCTURES AND FLUIDS, VOL 12	2009
1 and 2	Aluminum hull USV for coastal water and seafloor monitoring	Caccia, M.; Bibuli, M.; Bono, R.; Bruzzone, Ga.; Bruzzone, Gi.; Spirandelli, E.	OCEANS 2009 - EUROPE, VOLS 1 AND 2	2009
1	Radar Based Collision detection developments on USV ROAZ II	Almeida, Carlos; Franco, Tiago; Ferreira, Hugo; Martins, Alfredo; Santos, Ricardo; Almeida, Jose Miguel; Carvalho, Joao; Silva, Eduardo	OCEANS 2009 - EUROPE, VOLS 1 AND 2	2009
1	A Three-Layered Architecture for Real Time Path Planning and Obstacle Avoidance for Surveillance USVs Operating in Harbour Fields	Casalino, Giuseppe; Turetta, Alessio; Simetti, Enrico	OCEANS 2009 - EUROPE, VOLS 1 AND 2	2009
1	Visual-Based Navigation of an Autonomous Tugboat	Tall, M. H.; Rynne, P. F.; Lorio, J. M.; von Ellenrieder, K. D.	OCEANS 2009, VOLS 1-3	2009
4	Hunting Sea Mines with UUV-Based Magnetic and Electro-Optic Sensors	Sulzberger, G.; Bono, J.; Manley, R. J.; Clem, T.; Vaizer, L.; Holtzapple, R.	OCEANS 2009, VOLS 1-3	2009
4	Glider Observations of Optical Backscatter in Different Jerlov Water Types: Implications to US Naval Operations	Mahoney, K. L.; Allen, N. D.	OCEANS 2009, VOLS 1-3	2009
2	Unmanned Marine Vehicle Use at Hurricanes Wilma and Ike	Steimle, Eric T.; Murphy, Robin R.; Lindemuth, Michael; Hall, Micheal L.	OCEANS 2009, VOLS 1-3	2009
4	A Wind-Propelled Small Waterplane Area Spar	Rynne, P. F.; von Ellenrieder, K. D.	OCEANS 2009, VOLS 1-3	2009
4	Acoustic Communication Performance of the WHOI Micro-Modem in Sea Trials of the Nereus Vehicle to 11,000 m Depth	Singh, Sandipa; Webster, Sarah E.; Freitag, Lee; Whitcomb, Louis L.; Ball, Keenan; Bailey, John; Taylor, Chris	OCEANS 2009, VOLS 1-3	2009
3	Optimized Design of an Unmanned Surface Vehicle	Kanakakis, V.; Spanoudakis, P.; Tsourveloudis, N.	PROCEEDINGS ELMAR-2009	2009
4	DESIGN OVERVIEW OF A THREE-KILOWATT RECUPERATED CERAMIC TURBOSHAFT ENGINE	Vick, Michael J.; Heyes, Andrew; Pullen, Keith	PROCEEDINGS OF ASME TURBO EXPO 2009, VOL 5	2009
4	Improved Path Planning & Controlling for a Low Cost Navigation Solution of Unmanned Land Vehicle	Jafri, Syed Riaz Un Nabi; Jafri, Syed Minhaj Un Nabi; Shakeel, Syed Zeeshan	UKSIM 2009: ELEVENTH INTERNATIONAL CONFERENCE ON COMPUTER MODELLING AND SIMULATION	2009
4	Utilizing Visual Information for Path Planning of Autonomous Mobile Robot	Kim, Doogyu; Kim, Jayoung; Lee, Jihong; Joo, Hanbyul; Kweon, In-So	WCECS 2009: WORLD CONGRESS ON ENGINEERING AND COMPUTER SCIENCE, VOLS I AND II	2009
4	On an optical inertial navigation system - Part I	Iyer, Ram; Meixner, Jessica; Buckalew, Richard	IEEE TRANSACTIONS ON AUTOMATIC CONTROL	2008
1	Real-Time Mapping and Navigation by Fusion of Multiple Electro-Optic Sensors	Sandoval, Roman; Pusateri, Michael; Fry, Jonathan; Lesutis, Daniel; Siviter, Joanne	2008 37TH IEEE APPLIED IMAGERY PATTERN RECOGNITION WORKSHOP	2008
1	Tracking Control of Unmanned Trimaran Surface Vehicle: Using Adaptive Unscented Kalman Filter to Estimate the Uncertain Parameters	Peng, Yan; Han, Jianda	2008 IEEE CONFERENCE ON ROBOTICS, AUTOMATION, AND MECHATRONICS, VOLS 1 AND 2	2008
4	AUV Rendezvous Trajectories Generation for Underwater Recovery	Yakimenko, Oleg A.; Horner, Douglas P.; Pratt, Douglas G., Jr.	2008 MEDITERRANEAN CONFERENCE ON CONTROL AUTOMATION, VOLS 1-4	2008
4	Robustness of Fuzzy Logic based Controller for Unmanned Autonomous Underwater Vehicle	Kumar, G. V. Nagesh; Sobhan, P. V. S.; Rao, K. A. Gopala; Chowdary, D. Deepak	IEEE REGION 10 COLLOQUIUM AND THIRD INTERNATIONAL CONFERENCE ON INDUSTRIAL AND INFORMATION SYSTEMS, VOLS 1 AND 2	2008
1	Study on wireless data transmission of an autonomous water vehicle for ocean observation	Gu, Wei; Wang, Jianhua; Chu, Jianxin; Huang, Xixia	OCEANS 2008, VOLS 1-4	2008
1	Unmanned Surface Vehicles for Undergraduate Engineering Education	Holler, Joseph; Longfield, Stephen; Murphy, Katherine; Striz, Andrea; Bingham, Brian	OCEANS 2008, VOLS 1-4	2008
4	High-Performance Visualizations and Simulations for Ocean Environments and the Mine Countermeasure Mission Using C3L	Sustersic, John; Kandemir, Mahmut; Phoha, Shashi; Schmiedekamp, Mendel	OCEANS 2008, VOLS 1-4	2008
4	Adapting AUVs for Use in Under-Ice Scientific Missions	Ferguson, James	OCEANS 2008, VOLS 1-4	2008
4	Implementation and test of ISiMI100 AUV for a member of AUVs Fleet	Lee, Fill Youb; Jun, Bong Huan; Lee, Pan Mook; Kim, Kihun	OCEANS 2008, VOLS 1-4	2008
4	Research on Ku Wave-band RCS of A UAV Configured Flying Wing Configuration	Liu, Chunyang; Jiao, Yongchang; Zhang, Peng; Zhang, Fushun; Zhang, Linxi	PROCEEDINGS OF FIRST INTERNATIONAL CONFERENCE OF MODELLING AND SIMULATION, VOL III: MODELLING AND SIMULATION IN ELECTRONICS, COMPUTING, AND BIO-MEDICINE	2008
4	Spaceship Discovery's crew and cargo lander module designs for human exploration of Mars	Benton, Mark G., Sr.	SPACE TECHNOLOGY AND APPLICATIONS INTERNATIONAL FORUM STAIF 2008	2008
4	Low cost and low weight technologies for planetary surface exploration	Innocenti, M.; Pollini, L.	2007 3RD INTERNATIONAL CONFERENCE ON RECENT ADVANCES IN SPACE TECHNOLOGIES, VOLS 1 AND 2	2007
4	L-1 adaptive control of a UAV for aerobiological sampling	Wang, Jiang; Patel, Vijay; Woolsey, Craig A.; Hovakimyan, Naira; Schmale, David, III	2007 AMERICAN CONTROL CONFERENCE, VOLS 1-13	2007
1	Design and implement of a trimaran unmanned surface vehicle system	Qi, Juntong; Peng, Yan; Wang, He; Han, Jianda	2007 INTERNATIONAL CONFERENCE ON INFORMATION ACQUISITION, VOLS 1 AND 2	2007
2	Combining data collection from unmanned surface vehicles with geospatial analysis: Tools for improving surface water sampling, monitoring, and assessment	Casper, Andrew F.; Hall, Michael L.; Dixon, Barnali; Steimle, Eric T.	2007 OCEANS, VOLS 1-5	2007
4	Autonomous Underwater Vehicle (AUV) Fest 2007 summary	Bernstein, Phillip J.	2007 OCEANS, VOLS 1-5	2007
4	Under vehicle inspection with 3D imaging - Safety and security for check-point and gate-entry inspections	Sukumar, S. R.; Page, D. L.; Koschan, A. F.; Abidi, M. A.	3D IMAGING FOR SAFETY AND SECURITY	2007
4	Automated calibration methods for robotic multisensor landmine detection	Keranen, Joe G.; Miller, Jonathan; Schultz, Gregory; Topolosky, Zeke	DETECTION AND REMEDIATION TECHNOLOGIES FOR MINES AND MINELIKE TARGETS XII	2007
4	Underwater magnetic gradiometer for magnetic anomaly detection, localization and tracking	Kumar, S.; Sulzberger, G.; Bono, J.; Skvoretz, D.; Allen, G. I.; Clem, T. R.; Ebbert, M.; Bennett, S. L.; Ostrom, R. K.; Tzouris, A.	DETECTION AND REMEDIATION TECHNOLOGIES FOR MINES AND MINELIKE TARGETS XII	2007
1	The global path planning of micro-miniature surface unmanned vehicle based on improved SAS algorithm	Xiong Xinjuan; Fan Ningjun	ISTM/2007: 7TH INTERNATIONAL SYMPOSIUM ON TEST AND MEASUREMENT, VOLS 1-7, CONFERENCE PROCEEDINGS	2007
2	SWORDFISH: an autonomous surface vehicle for network centric operations	Ferreira, H.; Martins, R.; Marques, E.; Pinto, J.; Martins, A.; Almeida, J.; Sousa, J.; Silva, E. P.	OCEANS 2007 - EUROPE, VOLS 1-3	2007
1	Video summary - Neptus, command and control infrastructure for heterogeneous teams of autonomous vehicles	Dias, Paulo Sousa; Pinto, Jose; Goncalves, Rui; Goncalves, Gil; Sousa, Joao Borges; Pereira, Fernando L.	PROCEEDINGS OF THE 2007 IEEE INTERNATIONAL CONFERENCE ON ROBOTICS AND AUTOMATION, VOLS 1-10	2007
4	Numerical simulation of the deployment of a hybrid ROV optical fiber tether	Grosenbaugh, Mark A.; Whitcomb, Louis L.; Bingham, Brian; Gobat, Jason I.; Young, Chris	PROCEEDINGS OF THE 26TH INTERNATIONAL CONFERENCE ON OFFSHORE MECHANICS AND ARCTIC ENGINEERING, VOL 4	2007
4	Unmanned ground vehicle for autonomous nondestructive testing of FRP bridge decks	Klinkhachorn, P.; Mercer, A. Scott; Halabe, Udaya B.; GangaRao, Hota V. S.	Review of Progress in Quantitative Nondestructive Evaluation, Vols 26A and 26B	2007
4	Problems of Heat Transfer and Thermal Protection of Entry Vehicles for an Unmanned Mission to Mars	Anfimov, N. A.; Rumynskii, A. N.	FLUID DYNAMICS	2006
4	An adaptively generated feature set for low-resolution multi-frequency sonar images	Arrieta, Rodolfo; Arrieta, Lisa L.; Stack, Jason R.	DETECTION AND REMEDIATION TECHNOLOGIES FOR MINES AND MINELIKE TARGETS XI, PTS 1 AND 2	2006
4	Design and control of light mobile robotic system	Gao jun-yao; Xiong guangming; Xu zhengfei	IEEE ICMA 2006: PROCEEDING OF THE 2006 IEEE INTERNATIONAL CONFERENCE ON MECHATRONICS AND AUTOMATION, VOLS 1-3, PROCEEDINGS	2006
4	SimUGV - a simulator for analyzing energy dynamics and locomotion for Unmanned Ground Vehicles (UGV)	Sinha, Aakash; Vashishtha, Jyoti	MODELING AND SIMULATION FOR MILITARY APPLICATIONS	2006
4	Navigation and control system of a deep-sea unmanned underwater vehicle 'HEMIRE'	Lee, Pan-Mook; Jun, Bong-Huan; Li, Ji-Hong; Choi, Hyun Taek; Kim, Kihun; Kim, Sea-Moon; Lee, Chong-Moo; Han, Sang-Chul; Gu, Beob-Mo; Lee, Sang-Ryul; Chung, Hee-Sub; Choi, Hang S.	OCEANS 2006 - ASIA PACIFIC, VOLS 1 AND 2	2006
4	12.75 synthetic aperture sonar (SAS), high resolution and automatic target recognition	Matthews, Anthony D.; Montgomery, Thomas C.; Cook, Daniel A.; Oeschger, John W.; Stroud, John S.	OCEANS 2006, VOLS 1-4	2006
4	Demonstration of the real-time tracking gradiometer for buried mine hunting while operating from a small unmanned underwater vehicle	Sulzberger, G.; Bono, J.; Allen, G. I.; Clem, T.; Kumar, S.	OCEANS 2006, VOLS 1-4	2006
2	Unmanned surface vehicles as environmental monitoring and assessment tools	Steimle, Eric T.; Hall, Michael L.	OCEANS 2006, VOLS 1-4	2006
4	Advances in group filter applications to sea mine detection	An, M.; Cobbb, J. Tory; Shenefelt, B.; Tolimieri, R.	OCEANS 2006, VOLS 1-4	2006
1	Soft computing design of a linear quadratic Gaussian controller for an unmanned surface vehicle	Naeem, Wasif; Sutton, Robert; Chudley, John	PROCEEDINGS OF 2006 MEDITERRANEAN CONFERENCE ON CONTROL AND AUTOMATION, VOLS 1 AND 2	2006
4	A study on the design and manufacture of a deep-sea unmanned underwater vehicle based on structural reliability analysis	Joung, Tae-Hwan; Sammut, Karl; He, Fangpo; Nho, In-Sik; Lee, Jae-Hwan; Kim, Bong-Jae; Han, Seung-Ho; Park, Seong-Hwan; Lee, Chong-Moo; Lee, Pan-Mook	PROCEEDINGS OF THE SIXTEENTH (2006) INTERNATIONAL OFFSHORE AND POLAR ENGINEERING CONFERENCE, VOL 2	2006
4	Non-linear controls influence functions in an aircraft dynamics simulator	Guerreiro, Nelson M.; Hubbard, James E., Jr.; Motte, Mark A.	SMART STRUCTURES AND MATERIALS 2006: MODELING, SIGNAL PROCESSING, AND CONTROL	2006
1	Architecture for autonomy	Broten, Gregory S.; Monckton, Simon P.; Collier, Jack; Giesbrecht, Jared	UNMANNED SYSTEMS TECHNOLOGY VIII, PTS 1 AND 2	2006
4	Mobility of lightweight robots over snow	Lever, James H.; Shoop, Sally A.	UNMANNED SYSTEMS TECHNOLOGY VIII, PTS 1 AND 2	2006
2	Joint Robotics Program (JRP)-supported efforts at the space and naval warfare systems center, San Diego	Nguyen, Hoa G.; Everett, H. R.	UNMANNED SYSTEMS TECHNOLOGY VIII, PTS 1 AND 2	2006
1	Energy scavenging modes from renewable sources for Unmanned Surface Vehicles - A survey of concepts	Suryanarayanan, Siddharth; Cartes, David; Sidley, Richard	UNMANNED SYSTEMS TECHNOLOGY VIII, PTS 1 AND 2	2006
4	The visual servoing system CYCLOPE designed for dynamic stabilisation of AUV and ROV	Perrier, M	Oceans 2005 - Europe, Vols 1 and 2	2005
4	A numerical analysis for the dynamic behavior of ROV launcher and umbilical cable under combined excitations	Park, HI; Kwon, DY; Jung, DH	PROCEEDINGS OF THE FIFTEENTH (2005) INTERNATIONAL OFFSHORE AND POLAR ENGINEERING CONFERENCE, VOL 2	2005
4	Scene understanding based on network-symbolic models	Kuvich, G	Visual Information Processing XIV	2005
4	Optimal control for multiple unmanned underwater crawling vehicles	Lee, KH	PROCEEDINGS OF THE FOURTEENTH (2004) INTERNATIONAL OFFSHORE AND POLAR ENGINEERING CONFERENCE, VOL 2	2004
4	Fiber optic gyroscope automatic north-finder and prototype design	Zhang, ZJ; Wu, JY; Sun, JY	PROCEEDINGS OF THE THIRD INTERNATIONAL SYMPOSIUM ON INSTRUMENTATION SCIENCE AND TECHNOLOGY, VOL 2	2004
4	The application of SMA spring actuators to a lightweight modular compliant surface bio-inspired robot	Stone, DL; Cranney, J; Liang, R; Taya, M	SMART STRUCTURES AND MATERIALS 2004: INDUSTRIAL AND COMMERCIAL APPLICATIONS OF SMART STRUCTURES TECHNOLOGIES	2004
4	The development of a lightweight modular compliant surface bio-inspired robot	Stone, DL; Cranney, J	UNMANNED GROUND VEHICLE TECHNOLOGY VI	2004
4	JAUS Operator Control Unit (OCU) interoperability experiment: Preparation and results	Gray, SA; Harrison, JF; Smith, BG	UNMANNED GROUND VEHICLE TECHNOLOGY VI	2004
4	A lightweight heat shield system using a phenol CFRP material	Okuyama, K; Kato, S; Kanno, Y; Uto, M; Sakata, R; Hama, K; Yamada, T; Inatani, Y; Zako, M	4TH EUROPEAN WORKSHOP ON HOT STRUCTURES AND THERMAL PROTECTION SYSTEMS FOR SPACE VEHICLES	2003
1	Nearfield noise identification with a passive array in the underwater anechoic basin at KRISO	Kim, SM; Choi, Y; Lim, YK	OCEANS 2003 MTS/IEEE: CELEBRATING THE PAST...TEAMING TOWARD THE FUTURE	2003
2	Submarine cable infrastructure defense against terrorist aggression	Bannon, R; Burnett, D	OCEANS 2003 MTS/IEEE: CELEBRATING THE PAST...TEAMING TOWARD THE FUTURE	2003
4	Compact biomimetic structure systems with LIPCA and battery supported power control unit	Park, KH; Kim, KY; Lee, JD; Kang, TS; Park, HC; Yoon, KJ	SMART STRUCTURES AND MATERIALS 2003: SMART STRUCTURES AND INTEGRATED SYSTEMS	2003
4	A network-centric UUV acoustic measurement range system	Walrod, J; Nielsen, C; Hertel, K; Odell, D	OCEANS 2002 MTS/IEEE CONFERENCE & EXHIBITION, VOLS 1-4, CONFERENCE PROCEEDINGS	2002
4	GIS-based UAV real-time path planning and navigation	Levin, E; Kupiec, S; Forrester, T; DeBacker, A; Jannson, T	SENSORS, AND COMMAND, CONTROL, COMMUNICATIONS AND INTELLIGENCE (C31) TECHNOLOGIES FOR HOMELAND DEFENSE AND LAW ENFORCEMENT	2002
4	EURODOCKER - a universal docking downloading recharging system for AUVs	Knepper, S; Niemeyer, M; Galletti, R; Brighenti, A; Bjerrum, A; Andersen, N	MARINE TECHNOLOGY IV	2001
4	An intelligent control for a crawling unmanned vehicle	Lee, KH	OCEANS 2001 MTS/IEEE: AN OCEAN ODYSSEY, VOLS 1-4, CONFERENCE PROCEEDINGS	2001
4	Air-launched expendable micro-sized wave buoy	Miles, RT; Melhado, JA; Hughes, EW; Osiecki, D	OCEANS 2001 MTS/IEEE: AN OCEAN ODYSSEY, VOLS 1-4, CONFERENCE PROCEEDINGS	2001
4	Mortar launched surveillance system	Lewis, CE; Cooper, SM; Carlton, LA	UNATTENDED GROUND SENSOR TECHNOLOGIES AND APPLICATIONS III	2001
4	Mortar launched surveillance system	Lewis, CE; Carlton, LA	ENABLING TECHNOLOGIES FOR LAW ENFORCEMENT AND SECURITY	2000
4	Small wheeled rovers for unmanned lunar surface missions	Richter, L; Bernasconi, MC	PROCEEDINGS OF THE FOURTH INTERNATIONAL CONFERENCE ON EXPLORATION AND UTILISATION OF THE MOON	2000
4	The Ph-D project: Manned expedition to the moons of Mars	Singer, SF	SPACE TECHNOLOGY AND APPLICATIONS INTERNATIONAL FORUM, PTS 1 AND 2	2000
